# Supplementary material for: Effective lock-in strategy for proteomic analysis of corona complexes bound to amino-free ligands of gold nanoparticles
Source: Royal Society of Chemistry journal article supplement (doi:10.1039/c8nr01077c), 2018-01-01
Supplement: c8nr01077c1.xlsx [file c8nr01077c1.xlsx]

## Sheet: Methods I_II_III
Supplementary Table S1. Corona proteins identified from the three methods (Methods I, II and III), including their molecular weight (MW), isoelectric point (pI), grand average values of hydropathicity (GRAVY), functional annotation as well as their relative percentage based on three different experiments.
Uniprot ID	Protein description	MW (Da)	pI	GRAVY	Annotation	Method I (experiment 1)			Method I (experiment 2)			Method I (experiment 3)			Method II (experiment 1)			Method II (experiment 2)			Method II (experiment 3)			Method III (experiment 1)			Method III (experiment 2)			Method III (experiment 3)
						Mascot score	emPAI	Percentage	Mascot score	emPAI	Percentage	Mascot score	emPAI	Percentage	Mascot score	emPAI	Percentage	Mascot score	emPAI	Percentage	Mascot score	emPAI	Percentage	Mascot score	emPAI	Percentage	Mascot score	emPAI	Percentage	Mascot score	emPAI	Percentage
1433Z_HUMAN	14-3-3 protein zeta/delta OS=Homo sapiens GN=YWHAZ PE=1 SV=1	27899	4.73	-0.621	Tissue leakage	180	0.25	0.0189882	192	0.57	0.033909	205	0.57	0.0145002	303	0.4	0.0133764	303	0.4	0.0133327	303	0.4	0.0133384
A1AG1_HUMAN	Alpha-1-acid glycoprotein 1 OS=Homo sapiens GN=ORM1 PE=1 SV=1	23725	4.93	-0.536	Acute phase	98	0.3	0.0193769	100	0.3	0.0151767	186	0.48	0.0103838	247	0.48	0.0136502	247	0.48	0.0136056	247	0.48	0.0136114	416	0.69	0.0508412	416	0.69	0.0504273	416	0.69	0.0504774
A1AG2_HUMAN	Alpha-1-acid glycoprotein 2 OS=Homo sapiens GN=ORM2 PE=1 SV=2	23873	5.03	-0.583	Acute phase										90	0.48	0.0137353				90	0.48	0.0136963	140	0.3	0.0222428	140	0.3	0.0220617	140	0.3	0.0220836
A1AT_HUMAN	Alpha-1-antitrypsin OS=Homo sapiens GN=SERPINA1 PE=1 SV=3	46878	5.37	-0.183	Acute phase	2135	3.18	0.405837	2114	4.48	0.447814	1879	3.47	0.148323	1376	1.97	0.110695	1376	1.97	0.110333	1376	1.97	0.11038	2516	4.48	0.652241	2516	4.48	0.64693	2516	4.48	0.647573
A1BG_HUMAN	Alpha-1B-glycoprotein OS=Homo sapiens GN=A1BG PE=1 SV=4	54790	5.56	-0.217	Other plasma components	148	0.34	0.0507149	220	0.34	0.039722	157	0.42	0.0209827	91	0.06	0.00394043	91	0.06	0.00392756	91	0.06	0.00392923	386	0.79	0.134428	386	0.79	0.133333	386	0.79	0.133466
A2AP_HUMAN	Alpha-2-antiplasmin OS=Homo sapiens GN=SERPINF2 PE=1 SV=3	54873	5.87	-0.124	Coagulation	725	0.79	0.118016	1056	1.13	0.132217	518	1.01	0.0505347	127	0.19	0.0124969	127	0.19	0.0124561	127	0.19	0.0124614	271	0.19	0.0323797	271	0.19	0.0321161	271	0.19	0.032148
A2MG_HUMAN	Alpha-2-macroglobulin OS=Homo sapiens GN=A2M PE=1 SV=3	164613	6.03	-0.195	Acute phase	908	0.37	0.165814	1192	0.73	0.256235	1312	0.48	0.0720469	920	0.19	0.0374894	920	0.19	0.037367	920	0.19	0.0373829	2191	0.99	0.506128	2191	0.99	0.502007	2191	0.99	0.502506
A4_HUMAN	Amyloid beta A4 protein OS=Homo sapiens GN=APP PE=1 SV=3	87914	4.73	-0.584	Acute phase													125	0.08	0.00840269	125	0.08	0.00840627	341	0.2	0.0546071	341	0.2	0.0541625	341	0.2	0.0542163
AACT_HUMAN	Alpha-1-antichymotrypsin OS=Homo sapiens GN=SERPINA3 PE=1 SV=2	47792	5.33	-0.065	Acute phase	698	1.08	0.140519	710	1.72	0.175281	570	0.95	0.0413989	361	0.49	0.02807	361	0.49	0.0279783	361	0.49	0.0279902	605	0.59	0.0875726	605	0.59	0.0868596	605	0.59	0.0869459
ACTB_HUMAN	Actin, cytoplasmic 1 OS=Homo sapiens GN=ACTB PE=1 SV=1	42052	5.29	-0.2	Tissue leakage	1939	3.21	0.367492	1925	5.62	0.503934	2545	5.14	0.197088	3314	3.9	0.196581	3314	3.9	0.195939	3314	3.9	0.196023	603	0.46	0.0600766	603	0.46	0.0595875	603	0.46	0.0596467
ACTBL_HUMAN	Beta-actin-like protein 2 OS=Homo sapiens GN=ACTBL2 PE=1 SV=2	42318	5.39	-0.19	Tissue leakage	503	0.97	0.111751	389	0.83	0.0748952	474	0.97	0.0374289	630	0.57	0.0289129	630	0.57	0.0288184	630	0.57	0.0288307	316	0.35	0.0459996	316	0.35	0.0456251	316	0.35	0.0456704
ACTC_HUMAN	Actin, alpha cardiac muscle 1 OS=Homo sapiens GN=ACTC1 PE=1 SV=1	42334	5.23	-0.228	Tissue leakage	616	1.29	0.148674	515	1.29	0.116447	888	1.66	0.0640778				1264	1.66	0.0839591	1264	1.66	0.0839949
ACTG_HUMAN	Actin, cytoplasmic 2 OS=Homo sapiens GN=ACTG1 PE=1 SV=1	42108	5.31	-0.199	Tissue leakage				1799	5.62	0.504605	2345	4.69	0.180072	3120	3.54	0.178673	3120	3.54	0.178089	3120	3.54	0.178165
ACTN1_HUMAN	Alpha-actinin-1 OS=Homo sapiens GN=ACTN1 PE=1 SV=2	103563	5.25	-0.599	Tissue leakage	156	0.1	0.0281942	183	0.17	0.0375409	319	0.17	0.0160533	352	0.1	0.0124135	352	0.1	0.012373	352	0.1	0.0123783
AFAM_HUMAN	Afamin OS=Homo sapiens GN=AFM PE=1 SV=1	70963	5.64	-0.388	Other plasma components	84	0.05	0.00965957	95	0.09	0.0136184	110	0.09	0.0058235										148	0.09	0.0198351	148	0.09	0.0196737	148	0.09	0.0196932
AKAP1_HUMAN	A-kinase anchor protein 1, mitochondrial OS=Homo sapiens GN=AKAP1 PE=1 SV=1	98250	4.84	-0.325	Coagulation	34	0.03	0.00802434	34	0.03	0.00628499	31	0.03	0.00268759				29	0.03	0.00352147	29	0.03	0.00352297	37	0.03	0.00915408	37	0.03	0.00907955	37	0.03	0.00908857
AKD1A_HUMAN	Ankyrin repeat and death domain-containing protein 1A OS=Homo sapiens GN=ANKDD1A PE=2 SV=2	57914	6.22	-0.222	Other plasma components				31	0.06	0.00740945	34	0.06	0.00316843	29	0.06	0.00416511	29	0.06	0.0041515	29	0.06	0.00415327
ALBU_HUMAN	Serum albumin OS=Homo sapiens GN=ALB PE=1 SV=2	71317	5.92	-0.354	Acute phase	29647	67.98	13.1987	38537	102.45	15.5796	55693	231.72	15.0684	22079	34.1	2.915	22079	34.1	2.90548	22079	34.1	2.90672	40976	168.79	37.3853	40976	168.79	37.0809	40976	168.79	37.1178
ALDOA_HUMAN	Fructose-bisphosphate aldolase A OS=Homo sapiens GN=ALDOA PE=1 SV=2	39851	8.3	-0.262	Other plasma components													51	0.08	0.0038089	51	0.08	0.00381052
ALS_HUMAN	Insulin-like growth factor-binding protein complex acid labile subunit OS=Homo sapiens GN=IGFALS PE=1 SV=1	66735	6.33	0.019	Other plasma components	157	0.16	0.029069	234	0.27	0.038421	175	0.21	0.0127786										111	0.1	0.020726	111	0.1	0.0205572	111	0.1	0.0205776
AMACR_HUMAN	Alpha-methylacyl-CoA racemase OS=Homo sapiens GN=AMACR PE=1 SV=2	42702	6.07	-0.195	Lipoproteins	31	0.08	0.00930024	32	0.08	0.00728432	28	0.08	0.00311493				28	0.08	0.00408139	28	0.08	0.00408313	36	0.08	0.0106096				36	0.08	0.0105337
AMBP_HUMAN	Protein AMBP OS=Homo sapiens GN=AMBP PE=1 SV=1	39886	5.95	-0.299	Tissue leakage	481	1.05	0.114016	582	1.6	0.136079	513	1.22	0.0443701	165	0.49	0.0234265	165	0.49	0.02335	165	0.49	0.02336	221	0.27	0.0334461	221	0.27	0.0331738	221	0.27	0.0332067
ANGI_HUMAN	Angiogenin OS=Homo sapiens GN=ANG PE=1 SV=1	16882	9.73	-0.422	Tissue leakage	234	1.08	0.0496368	291	1.08	0.0388775	267	1.08	0.0166248	225	0.44	0.00890364	225	0.44	0.00887456	225	0.44	0.00887834	244	0.73	0.0382743	244	0.73	0.0379627	244	0.73	0.0380004
ANGL6_HUMAN	Angiopoietin-related protein 6 OS=Homo sapiens GN=ANGPTL6 PE=1 SV=1	52061	8.78	-0.478	Other plasma components	1644	1.67	0.236693	1922	2.41	0.267535	2190	3.36	0.1595	1207	1.36	0.0848677	1207	1.36	0.0845905	1207	1.36	0.0846266	526	0.63	0.101862	526	0.63	0.101033	526	0.63	0.101133
ANGT_HUMAN	Angiotensinogen OS=Homo sapiens GN=AGT PE=1 SV=1	53406	5.87	0.065	Tissue leakage	568	0.35	0.0508878	565	0.52	0.0592167	545	0.35	0.0170439	292	0.27	0.017284	292	0.27	0.0172276	292	0.27	0.0172349	349	0.2	0.0331727	349	0.2	0.0329026	349	0.2	0.0329353
ANT3_HUMAN	Antithrombin-III OS=Homo sapiens GN=SERPINC1 PE=1 SV=1	53025	6.32	-0.278	Acute phase	920	1.06	0.153018	914	1.19	0.134548	437	0.83	0.04013	393	0.52	0.0330503	393	0.52	0.0329423	393	0.52	0.0329564	706	0.83	0.136685	706	0.83	0.135572	706	0.83	0.135707
ANXA2_HUMAN	Annexin A2 OS=Homo sapiens GN=ANXA2 PE=1 SV=2	38808	7.57	-0.524	Lipoproteins										112	0.18	0.00837308	112	0.18	0.00834573	112	0.18	0.00834928	66	0.09	0.0108474	66	0.09	0.0107591	66	0.09	0.0107698
APOA_HUMAN	Apolipoprotein(a) OS=Homo sapiens GN=LPA PE=1 SV=1	514737	5.58	-0.725	Lipoproteins	31	0.01	0.0140133	62	0.02	0.0219516	64	0.01	0.00469348	96	0.01	0.00616988	96	0.01	0.00614973	96	0.01	0.00615235	48	0.01	0.0159862	48	0.01	0.0158561
APOA1_HUMAN	Apolipoprotein A-I OS=Homo sapiens GN=APOA1 PE=1 SV=1	30759	5.56	-0.717	Lipoproteins	4117	18.64	1.5609	4323	18.64	1.22256	4257	31.82	0.892447	2572	12.03	0.443536	2572	12.03	0.442087	2572	12.03	0.442276	4245	28.62	2.73403	4245	28.62	2.71177	4245	28.62	2.71446
APOA2_HUMAN	Apolipoprotein A-II OS=Homo sapiens GN=APOA2 PE=1 SV=1	11282	6.26	-0.084	Lipoproteins	605	2.77	0.0850789	749	3.92	0.0943025	765	5.42	0.0557565	295	1.22	0.0164982	295	1.22	0.0164443	295	1.22	0.0164513
APOA4_HUMAN	Apolipoprotein A-IV OS=Homo sapiens GN=APOA4 PE=1 SV=3	45371	5.28	-0.796	Lipoproteins	2392	6.14	0.758407	2615	9.88	0.955842	2727	7.21	0.29828	916	2.3	0.125083	916	2.3	0.124674	916	2.3	0.124727	1740	4.78	0.673546	1740	4.78	0.668062	1740	4.78	0.668726
APOA5_HUMAN	Apolipoprotein A-V OS=Homo sapiens GN=APOA5 PE=1 SV=1	41244	5.98	-0.565	Lipoproteins	351	0.85	0.0954411	421	1.16	0.102016	322	0.59	0.0221882	103	0.17	0.00840429	103	0.17	0.00837684	103	0.17	0.00838041
APOB_HUMAN	Apolipoprotein B-100 OS=Homo sapiens GN=APOB PE=1 SV=2	516651	6.58	-0.296	Lipoproteins	2336	0.39	0.548552	2670	0.49	0.539814	2319	0.44	0.207281	678	0.08	0.0495426	678	0.08	0.0493807	678	0.08	0.0494018	2820	0.33	0.529507	2820	0.33	0.525196	2820	0.33	0.525718
APOC1_HUMAN	Apolipoprotein C-I OS=Homo sapiens GN=APOC1 PE=1 SV=1	9326	8.01	-0.119	Lipoproteins	113	1.59	0.040369	208	2.56	0.050908	137	1.59	0.0135208	131	0.89	0.00994894	131	0.89	0.00991644	131	0.89	0.00992067	55	0.89	0.0257778	55	0.89	0.0255679	55	0.89	0.0255934
APOC2_HUMAN	Apolipoprotein C-II OS=Homo sapiens GN=APOC2 PE=1 SV=1	11277	4.72	-0.169	Lipoproteins	141	0.7	0.0214905	166	1.22	0.0293362	118	1.22	0.0125448	86	0.7	0.009462	86	0.7	0.00943109	86	0.7	0.00943511
APOC3_HUMAN	Apolipoprotein C-III OS=Homo sapiens GN=APOC3 PE=1 SV=1	10846	5.23	-0.086	Lipoproteins	543	2.97	0.0876964	578	2.97	0.0686874	844	8.07	0.0798092	453	2.97	0.0386116	453	2.97	0.0384854	453	2.97	0.0385018	360	0.32	0.010779	360	0.32	0.0106913	360	0.32	0.0107019
APOC4_HUMAN	Apolipoprotein C-IV OS=Homo sapiens GN=APOC4 PE=1 SV=1	14886	9.19	-0.265	Lipoproteins	60	0.85	0.0344471	120	0.85	0.0269804	199	1.8	0.0244321
APOD_HUMAN	Apolipoprotein D OS=Homo sapiens GN=APOD PE=1 SV=1	21547	5.06	-0.053	Lipoproteins	177	1.06	0.0621797	308	1.38	0.063404	216	1.06	0.0208258	201	0.54	0.0139467	201	0.54	0.0139012	201	0.54	0.0139071
APOE_HUMAN	Apolipoprotein E OS=Homo sapiens GN=APOE PE=1 SV=1	36246	5.65	-0.596	Lipoproteins	3909	15.37	1.51667	3929	20.28	1.5674	3759	20.28	0.670252	1760	10.54	0.457922	1760	10.54	0.456427	1760	10.54	0.456621	1913	7.14	0.803747	1913	7.14	0.797203	1913	7.14	0.797995
APOF_HUMAN	Apolipoprotein F OS=Homo sapiens GN=APOF PE=1 SV=2	35719	5.42	-0.071	Lipoproteins	77	0.09	0.0087518	78	0.19	0.0144712	37	0.09	0.00293124
APOH_HUMAN	Beta-2-glycoprotein 1 OS=Homo sapiens GN=APOH PE=1 SV=3	39584	8.34	-0.274	Lipoproteins	2578	5.85	0.630422	2641	5.32	0.449037	1500	2.61	0.0942042	2258	4.84	0.229645	2258	4.84	0.228895	2258	4.84	0.228992	1070	2.61	0.320864	1070	2.61	0.318252	1070	2.61	0.318568
APOL1_HUMAN	Apolipoprotein L1 OS=Homo sapiens GN=APOL1 PE=1 SV=5	44004	5.6	-0.239	Lipoproteins	470	0.44	0.0527109	502	0.79	0.0741259	551	0.92	0.0369139	319	0.44	0.0232079	319	0.44	0.0231321	319	0.44	0.023142	176	0.16	0.0218662	176	0.16	0.0216882	176	0.16	0.0217097
AQP1_HUMAN	Aquaporin-1 OS=Homo sapiens GN=AQP1 PE=1 SV=3	28736	6.95	0.495	Tissue leakage										41	0.12	0.00413332	41	0.12	0.00411982
ARC1B_HUMAN	Actin-related protein 2/3 complex subunit 1B OS=Homo sapiens GN=ARPC1B PE=1 SV=3	41722	8.69	-0.198	Tissue leakage													54	0.08	0.00398773	54	0.08	0.00398943
ARF1_HUMAN	ADP-ribosylation factor 1 OS=Homo sapiens GN=ARF1 PE=1 SV=2	20741	6.32	-0.262	Lipoproteins	27	0.16	0.00903453	77	0.35	0.0154792	57	0.35	0.00661923				147	0.57	0.0141246	147	0.57	0.0141306
ARP3_HUMAN	Actin-related protein 3 OS=Homo sapiens GN=ACTR3 PE=1 SV=3	47797	5.61	-0.266	Tissue leakage													100	0.07	0.00399732	100	0.07	0.00399902
ASPM_HUMAN	Abnormal spindle-like microcephaly-associated protein OS=Homo sapiens GN=ASPM PE=1 SV=2	413189	10.45	-0.482	Other plasma components	29	0.01	0.0112488				34	0.01	0.00376755	27	0.01	0.00495268	27	0.01	0.0049365							46	0.01	0.012728	46	0.01	0.0127406
ASPN_HUMAN	Asporin OS=Homo sapiens GN=ASPN PE=1 SV=2	43788	6.61	-0.348	Tissue leakage	543	0.79	0.0941755	585	1.23	0.114845	469	1.23	0.04911	279	0.55	0.0288675	279	0.55	0.0287732	279	0.55	0.0287855	74	0.55	0.074796	74	0.55	0.0741871	74	0.55	0.0742608
ATPA_HUMAN	ATP synthase subunit alpha, mitochondrial OS=Homo sapiens GN=ATP5A1 PE=1 SV=1	59828	9.16	-0.067	Tissue leakage	108	0.05	0.00814386				59	0.05	0.00272762	206	0.11	0.00788839	206	0.11	0.00786262	206	0.11	0.00786598	107	0.05	0.00929042	107	0.05	0.00921478	107	0.05	0.00922394
ATPB_HUMAN	ATP synthase subunit beta, mitochondrial OS=Homo sapiens GN=ATP5B PE=1 SV=3	56525	5.26	0.018	Tissue leakage	175	0.06	0.0092331	202	0.12	0.0144635	102	0.06	0.00309244	339	0.25	0.0169384	339	0.25	0.0168831	339	0.25	0.0168902	91	0.06	0.010533	91	0.06	0.0104473	91	0.06	0.0104576
B2MG_HUMAN	Beta-2-microglobulin OS=Homo sapiens GN=B2M PE=1 SV=1	13820	6.06	-0.376	Immunoglobulins	78	0.25	0.00940597	84	0.25	0.00736714	65	0.25	0.00315034	68	0.25	0.00414132	68	0.25	0.0041278	68	0.25	0.00412956
B3AT_HUMAN	Band 3 anion transport protein OS=Homo sapiens GN=SLC4A1 PE=1 SV=3	102013	5.08	0.213	Complement system	515	0.29	0.0805396	596	0.61	0.132689	745	0.56	0.0520899	636	0.37	0.0452427	636	0.37	0.0450949	636	0.37	0.0451141
B4GT1_HUMAN	Beta-1,4-galactosyltransferase 1 OS=Homo sapiens GN=B4GALT1 PE=1 SV=5	44291	8.88	-0.206	Acute phase										50	0.07	0.00371625	50	0.07	0.00370411	50	0.07	0.00370569	47	0.07	0.00962885	47	0.07	0.00955045
B4GT5_HUMAN	Beta-1,4-galactosyltransferase 5 OS=Homo sapiens GN=B4GALT5 PE=2 SV=1	45318	8.21	-0.343	Tissue leakage										50	0.07	0.00380242	50	0.07	0.00379	50	0.07	0.00379161	47	0.07	0.00985212	47	0.07	0.00977191
BGH3_HUMAN	Transforming growth factor-beta-induced protein ig-h3 OS=Homo sapiens GN=TGFBI PE=1 SV=1	75261	7.62	-0.085	Tissue leakage	216	0.24	0.0491742	303	0.35	0.056168	480	0.82	0.0562722	198	0.09	0.00811902	198	0.09	0.0080925	198	0.09	0.00809595	75	0.19	0.0444104				75	0.19	0.0440926
BMP1_HUMAN	Bone morphogenetic protein 1 OS=Homo sapiens GN=BMP1 PE=1 SV=2	113516	6.48	-0.601	Tissue leakage	35	0.03	0.00927116	38	0.03	0.00726155	47	0.03	0.00310519				56	0.06	0.00813727	56	0.06	0.00814074				45	0.03	0.0104903	45	0.03	0.0105007
BPIB1_HUMAN	BPI fold-containing family B member 1 OS=Homo sapiens GN=BPIFB1 PE=1 SV=1	52580	6.72	0.321	Lipoproteins	97	0.13	0.0186089	69	0.13	0.0145752	114	0.35	0.0167803
BT1A1_HUMAN	Butyrophilin subfamily 1 member A1 OS=Homo sapiens GN=BTN1A1 PE=1 SV=3	59493	5.38	-0.303	Other plasma components										29	0.06	0.00427867				29	0.06	0.00426651
C1QA_HUMAN	Complement C1q subcomponent subunit A OS=Homo sapiens GN=C1QA PE=1 SV=2	26285	9.26	-0.381	Complement system	4411	3.19	0.228273	4601	7.58	0.424843	12641	11.28	0.27035	7244	9.9	0.311914	7244	9.9	0.310895	7244	9.9	0.311027	6501	7.58	0.618782	6501	7.58	0.613745	6501	7.58	0.614355
C1QB_HUMAN	Complement C1q subcomponent subunit B OS=Homo sapiens GN=C1QB PE=1 SV=3	26933	8.83	-0.257	Complement system	5047	10.57	0.775025	6125	9.29	0.533521	7875	19.71	0.48404	9129	11.99	0.387075	9129	11.99	0.385811	9129	11.99	0.385975	10713	22.28	1.86363	10713	22.28	1.84846	10713	22.28	1.8503
C1QC_HUMAN	Complement C1q subcomponent subunit C OS=Homo sapiens GN=C1QC PE=1 SV=3	25985	8.61	-0.186	Complement system	2872	2.35	0.166244	3095	1.97	0.109154	3715	5.92	0.140267	3516	2.78	0.0865882	3516	2.78	0.0863054	3516	2.78	0.0863422	8611	5.92	0.477755	8611	5.92	0.473865	8611	5.92	0.474336
C1R_HUMAN	Complement C1r subcomponent OS=Homo sapiens GN=C1R PE=1 SV=2	81606	5.82	-0.51	Complement system	2936	1.9	0.422116	2786	1.9	0.330618	3971	2.82	0.209837	1565	1.48	0.144769	1565	1.48	0.144296	1565	1.48	0.144357	892	0.48	0.121653	892	0.48	0.120663	892	0.48	0.120783
C1RL_HUMAN	Complement C1r subcomponent-like protein OS=Homo sapiens GN=C1RL PE=1 SV=2	54206	6.75	-0.364	Complement system	159	0.13	0.0191843	281	0.19	0.021961	304	0.27	0.0133451	140	0.19	0.012345	140	0.19	0.0123047	140	0.19	0.01231	168	0.13	0.0218853	168	0.13	0.0217071	168	0.13	0.0217286
C1S_HUMAN	Complement C1s subcomponent OS=Homo sapiens GN=C1S PE=1 SV=1	78174	4.86	-0.371	Complement system	735	0.51	0.10854	913	0.85	0.141688	985	1.37	0.0976546	648	0.33	0.030922	648	0.33	0.030821	648	0.33	0.0308341	310	0.39	0.0946864	310	0.39	0.0939155	310	0.39	0.0940089
C4BPA_HUMAN	C4b-binding protein alpha chain OS=Homo sapiens GN=C4BPA PE=1 SV=2	69042	7.15	-0.477	Complement system	2748	2.51	0.471784	2854	3.03	0.446074	4312	4.58	0.288329	2455	2.67	0.220961	2455	2.67	0.220239	2455	2.67	0.220333	2369	2.51	0.538205	2369	2.51	0.533823	2369	2.51	0.534354
C4BPB_HUMAN	C4b-binding protein beta chain OS=Homo sapiens GN=C4BPB PE=1 SV=1	29308	5.05	-0.276	Complement system																			92	0.24	0.0218453	92	0.24	0.0216675	92	0.24	0.021689
CADH1_HUMAN	Cadherin-1 OS=Homo sapiens GN=CDH1 PE=1 SV=3	97852	4.58	-0.351	Tissue leakage	142	0.07	0.0186476	212	0.18	0.0375572	225	0.14	0.0124913	216	0.14	0.0164206	216	0.14	0.016367	216	0.14	0.0163739	153	0.03	0.009117	153	0.03	0.00904277	153	0.03	0.00905176
CALX_HUMAN	Calnexin OS=Homo sapiens GN=CANX PE=1 SV=2	67982	4.47	-0.874	Other plasma components													35	0.05	0.00406101	35	0.05	0.00406274
CAMP_HUMAN	Cathelicidin antimicrobial peptide OS=Homo sapiens GN=CAMP PE=1 SV=1	19517	9.48	-0.442	Tissue leakage	95	0.17	0.0090327	115	0.37	0.015398	79	0.17	0.00302532
CAP1_HUMAN	Adenylyl cyclase-associated protein 1 OS=Homo sapiens GN=CAP1 PE=1 SV=5	52325	8.24	-0.352	Tissue leakage										126	0.13	0.0081535	126	0.13	0.00812686	126	0.13	0.00813033
CASPA_HUMAN	Caspase-10 OS=Homo sapiens GN=CASP10 PE=1 SV=3	59597	6.95	-0.353	Tissue leakage													28	0.06	0.00427215	28	0.06	0.00427397
CAZA1_HUMAN	F-actin-capping protein subunit alpha-1 OS=Homo sapiens GN=CAPZA1 PE=1 SV=3	33073	5.45	-0.668	Coagulation				60	0.1	0.0070522	35	0.1	0.00301567	85	0.1	0.00396428	85	0.1	0.00395134	85	0.1	0.00395302
CBP_HUMAN	CREB-binding protein OS=Homo sapiens GN=CREBBP PE=1 SV=3	268033	8.83	-0.69	Tissue leakage	92	0.01	0.00729699	88	0.01	0.0057153	155	0.01	0.00244398	90	0.01	0.00321277	90	0.01	0.00320228	90	0.01	0.00320364	55	0.01	0.00832433	55	0.01	0.00825655	55	0.01	0.00826476
CBPB2_HUMAN	Carboxypeptidase B2 OS=Homo sapiens GN=CPB2 PE=1 SV=2	48964	7.61	-0.162	Coagulation	92	0.14	0.0186621	133	0.22	0.0229694	144	0.48	0.0214303	152	0.3	0.0176072	152	0.3	0.0175497	152	0.3	0.0175571	144	0.39	0.0593065	144	0.39	0.0588237	144	0.39	0.0588821
CBPN_HUMAN	Carboxypeptidase N catalytic chain OS=Homo sapiens GN=CPN1 PE=1 SV=1	52538	6.86	-0.476	Coagulation	382	0.28	0.0400486	756	0.44	0.0492921	766	0.53	0.0253898	352	0.28	0.0176329	352	0.28	0.0175753	352	0.28	0.0175828	121	0.06	0.00979007	121	0.06	0.00971036	121	0.06	0.00972001
CCD34_HUMAN	Coiled-coil domain-containing protein 34 OS=Homo sapiens GN=CCDC34 PE=1 SV=2	43598	7.07	-1.309	Coagulation	26	0.08	0.00949538				35	0.08	0.00318029										30	0.08	0.0108322	30	0.08	0.010744	30	0.08	0.0107547
CD14_HUMAN	Monocyte differentiation antigen CD14 OS=Homo sapiens GN=CD14 PE=1 SV=2	40678	5.84	0.083	Coagulation	210	0.17	0.0188263	348	0.37	0.0320931	290	0.48	0.0178037	90	0.17	0.00828895	90	0.17	0.00826188	90	0.17	0.0082654	71	0.08	0.0101067	71	0.08	0.0100244
CD22_HUMAN	B-cell receptor CD22 OS=Homo sapiens GN=CD22 PE=1 SV=2	96599	6.21	-0.49	Coagulation																			31	0.03	0.00900025	31	0.03	0.00892698	31	0.03	0.00893585
CD36_HUMAN	Platelet glycoprotein 4 OS=Homo sapiens GN=CD36 PE=1 SV=2	53589	8.19	0.015	Coagulation				170	0.2	0.0228537	84	0.2	0.00977272	162	0.06	0.00385406	162	0.06	0.00384147	162	0.06	0.00384311
CD5L_HUMAN	CD5 antigen-like OS=Homo sapiens GN=CD5L PE=1 SV=1	39603	5.28	-0.443	Coagulation	1510	2.33	0.251212	1715	2.61	0.220404	1965	3.23	0.116638	1721	2.33	0.110605	1721	2.33	0.110244	1721	2.33	0.110291	999	1.62	0.199253	999	1.62	0.19763	999	1.62	0.197827
CD9_HUMAN	CD9 antigen OS=Homo sapiens GN=CD9 PE=1 SV=4	25969	6.8	0.487	Coagulation	59	0.13	0.00919082	28	0.13	0.00719862							145	0.44	0.0136514	145	0.44	0.0136573
CDC42_HUMAN	Cell division control protein 42 homolog OS=Homo sapiens GN=CDC42 PE=1 SV=2	21587	6.15	-0.157	Coagulation													64	0.16	0.00412651	64	0.16	0.00412827
CEMIP_HUMAN	Cell migration-inducing and hyaluronan-binding protein OS=Homo sapiens GN=CEMIP PE=1 SV=2	154440	7.98	-0.385	Complement system	70	0.02	0.00840902	52	0.04	0.0131726				44	0.02	0.00370238				44	0.02	0.00369186
CERU_HUMAN	Ceruloplasmin OS=Homo sapiens GN=CP PE=1 SV=1	122983	5.44	-0.536	Acute phase	366	0.17	0.056918	702	0.33	0.0865386	583	0.37	0.0414913	896	0.17	0.0250602	896	0.17	0.0249784	896	0.17	0.024989	918	0.44	0.168058	918	0.44	0.166689	918	0.44	0.166855
CETP_HUMAN	Cholesteryl ester transfer protein OS=Homo sapiens GN=CETP PE=1 SV=2	55120	5.7	0.175	Tissue leakage	269	0.26	0.0390156	295	0.34	0.0399612	307	0.42	0.021109	185	0.19	0.0125532	185	0.19	0.0125122	185	0.19	0.0125175				68	0.06	0.0101876	68	0.06	0.0101977
CFAB_HUMAN	Complement factor B OS=Homo sapiens GN=CFB PE=1 SV=2	86847	6.67	-0.501	Complement system	823	0.62	0.146589	1019	0.74	0.137037	264	0.4	0.0316756	644	0.74	0.0770332	644	0.74	0.0767816	644	0.74	0.0768143	392	0.4	0.107889	392	0.4	0.10701	392	0.4	0.107117
CFAD_HUMAN	Complement factor D OS=Homo sapiens GN=CFD PE=1 SV=5	27529	7.64	-0.099	Complement system	269	0.77	0.0577081	313	0.99	0.0581134	238	0.77	0.0193282	142	0.58	0.0191386	142	0.58	0.0190761	142	0.58	0.0190842	141	0.41	0.0350538	141	0.41	0.0347684	141	0.41	0.034803
CFAH_HUMAN	Complement factor H OS=Homo sapiens GN=CFH PE=1 SV=4	143680	6.21	-0.603	Complement system	4033	1.81	0.707996	4022	2.15	0.658697	1767	1.1	0.144112	2759	1.63	0.280721	2759	1.63	0.279804	2759	1.63	0.279923	3118	1.63	0.727352	3118	1.63	0.72143	3118	1.63	0.722147
CFAI_HUMAN	Complement factor I OS=Homo sapiens GN=CFI PE=1 SV=2	68102	7.72	-0.321	Complement system	146	0.15	0.0278104	121	0.21	0.0304951	86	0.15	0.00931453	127	0.21	0.0171424	127	0.21	0.0170864	127	0.21	0.0170936	153	0.21	0.0444161	153	0.21	0.0440544	153	0.21	0.0440982
CH60_HUMAN	60 kDa heat shock protein, mitochondrial OS=Homo sapiens GN=HSPD1 PE=1 SV=2	61187	5.7	-0.076	Tissue leakage	97	0.05	0.00832885	56	0.05	0.00652349	122	0.05	0.00278958
CLIC1_HUMAN	Chloride intracellular channel protein 1 OS=Homo sapiens GN=CLIC1 PE=1 SV=4	27248	5.09	-0.284	Tissue leakage				51	0.12	0.00697215	87	0.12	0.00298144				73	0.12	0.00390649	73	0.12	0.00390815
CLUS_HUMAN	Clusterin OS=Homo sapiens GN=CLU PE=1 SV=1	53031	5.89	-0.665	Lipoproteins	2735	3	0.433119	2595	2.54	0.28722	2525	3.24	0.15667	1322	1.47	0.0934412	1322	1.47	0.093136	1322	1.47	0.0931757	1348	1.32	0.217403	1348	1.32	0.215633	1348	1.32	0.215847
CNDP1_HUMAN	Beta-Ala-His dipeptidase OS=Homo sapiens GN=CNDP1 PE=1 SV=4	56784	5.14	-0.089	Tissue leakage	26	0.06	0.00927541				37	0.12	0.00621323
CO2_HUMAN	Complement C2 OS=Homo sapiens GN=C2 PE=1 SV=2	84583	7.23	-0.298	Complement system	82	0.08	0.0184217	161	0.21	0.0378751	34	0.04	0.00308498
CO3_HUMAN	Complement C3 OS=Homo sapiens GN=C3 PE=1 SV=2	188569	6.02	-0.32	Complement system	7419	2.5	1.28341	8241	3.76	1.51185	6379	3.01	0.517543	6872	3.3	0.745891	6872	3.3	0.743455	6872	3.3	0.743772	5485	2.44	1.42896	5485	2.44	1.41733	5485	2.44	1.41874
CO4A_HUMAN	Complement C4-A OS=Homo sapiens GN=C4A PE=1 SV=2	194261	6.65	-0.252	Complement system	4881	1.5	0.793291	5503	2.26	0.936149	5769	2.16	0.382604	5044	2.21	0.514599	5044	2.21	0.512918	5044	2.21	0.513137	3845	1.19	0.717949	3845	1.19	0.712103	3845	1.19	0.712811
CO4B_HUMAN	Complement C4-B OS=Homo sapiens GN=C4B PE=1 SV=2	194170	6.89	-0.253	Complement system	5256	1.59	0.840495	5915	2.55	1.05578	5921	2.27	0.4019	5276	2.38	0.553924	5276	2.38	0.552115	5276	2.38	0.55235	3789	1.19	0.717612	3789	1.19	0.71177	3789	1.19	0.712477
CO5_HUMAN	Complement C5 OS=Homo sapiens GN=C5 PE=1 SV=4	189897	6.11	-0.176	Complement system	123	0.05	0.025849	300	0.07	0.0283444	225	0.05	0.00865761	273	0.07	0.0159334	273	0.07	0.0158813	273	0.07	0.0158881	379	0.09	0.0530788	379	0.09	0.0526467	379	0.09	0.052699
CO6_HUMAN	Complement component C6 OS=Homo sapiens GN=C6 PE=1 SV=3	108367	6.39	-0.594	Complement system	144	0.09	0.0265519	217	0.16	0.0369716	135	0.09	0.00889302	383	0.16	0.020783	383	0.16	0.0207151	383	0.16	0.0207239	89	0.06	0.0201934				89	0.06	0.0200489
CO6A1_HUMAN	Collagen alpha-1(VI) chain OS=Homo sapiens GN=COL6A1 PE=1 SV=3	109602	5.26	-0.525	Complement system	146	0.12	0.035806	264	0.16	0.0373929	304	0.16	0.01599	176	0.06	0.00788245	176	0.06	0.0078567	176	0.06	0.00786005	130	0.09	0.0306353	130	0.09	0.0303859	130	0.09	0.0304161
CO6A3_HUMAN	Collagen alpha-3(VI) chain OS=Homo sapiens GN=COL6A3 PE=1 SV=5	345167	6.26	-0.227	Complement system	37	0.02	0.0187938	228	0.07	0.0515203	364	0.1	0.0314731	303	0.03	0.012412	303	0.03	0.0123715	303	0.03	0.0123767	186	0.04	0.0428795	186	0.04	0.0425304	186	0.04	0.0425727
CO7_HUMAN	Complement component C7 OS=Homo sapiens GN=C7 PE=1 SV=2	96650	6.09	-0.486	Complement system	228	0.18	0.047362	280	0.22	0.0453394	85	0.11	0.00969403	124	0.11	0.0127434	124	0.11	0.0127018	124	0.11	0.0127072
CO8A_HUMAN	Complement component C8 alpha chain OS=Homo sapiens GN=C8A PE=1 SV=2	66832	6.07	-0.516	Complement system	111	0.1	0.0181945	123	0.15	0.021376				74	0.05	0.0040054	74	0.05	0.00399232
CO8B_HUMAN	Complement component C8 beta chain OS=Homo sapiens GN=C8B PE=1 SV=3	68714	8.5	-0.553	Complement system	436	0.32	0.059862	714	0.67	0.0981682	355	0.6	0.037593	438	0.6	0.0494183	438	0.6	0.0492569	438	0.6	0.0492779	151	0.32	0.0682898	151	0.32	0.0677338	151	0.32	0.0678012
CO8G_HUMAN	Complement component C8 gamma chain OS=Homo sapiens GN=C8G PE=1 SV=3	22435	8.49	-0.059	Complement system	177	0.52	0.0317603	220	0.75	0.0358788	105	0.32	0.00654615	116	0.52	0.0139837	116	0.52	0.013938	116	0.52	0.0139439	100	0.32	0.0222965	100	0.32	0.022115	100	0.32	0.022137
CO9_HUMAN	Complement component C9 OS=Homo sapiens GN=C9 PE=1 SV=2	64615	5.43	-0.45	Complement system	974	0.91	0.160078	1279	1.57	0.216314	1345	1.57	0.0925003	422	0.56	0.0433723	422	0.56	0.0432306	422	0.56	0.0432491	405	0.56	0.112378	405	0.56	0.111463	405	0.56	0.111574
COF1_HUMAN	Cofilin-1 OS=Homo sapiens GN=CFL1 PE=1 SV=3	18719	8.22	-0.359	Tissue leakage										114	0.18	0.00403874	114	0.18	0.00402555	114	0.18	0.00402727
COIA1_HUMAN	Collagen alpha-1(XVIII) chain OS=Homo sapiens GN=COL18A1 PE=1 SV=5	179389	5.67	-0.467	Complement system	83	0.04	0.0195349	48	0.02	0.00765027				43	0.02	0.00430048	43	0.02	0.00428643	43	0.02	0.00428826	74	0.02	0.0111426	74	0.02	0.0110519	74	0.02	0.0110629
COL10_HUMAN	Collectin-10 OS=Homo sapiens GN=COLEC10 PE=2 SV=2	31084	6.96	-0.537	Complement system	571	1.04	0.0880088	866	1.5	0.0994212	1138	3.15	0.0892807	575	1.04	0.0387491	575	1.04	0.0386225	575	1.04	0.038639	607	0.84	0.0810918	607	0.84	0.0804316	607	0.84	0.0805115
COL11_HUMAN	Collectin-11 OS=Homo sapiens GN=COLEC11 PE=1 SV=1	29046	5.26	-0.451	Complement system	1180	1.96	0.154988	1483	3.09	0.19138	1609	6.84	0.181156	770	1.14	0.0396901	770	1.14	0.0395605	770	1.14	0.0395773	537	1.38	0.124488	537	1.38	0.123474	537	1.38	0.123597
COMP_HUMAN	Cartilage oligomeric matrix protein OS=Homo sapiens GN=COMP PE=1 SV=2	85431	4.36	-0.73	Tissue leakage	173	0.21	0.0488417	154	0.16	0.0291465	551	0.51	0.0397279				215	0.04	0.00408268	215	0.04	0.00408442	1063	0.3	0.0795972	1063	0.3	0.0789491	1063	0.3	0.0790276
COR1A_HUMAN	Coronin-1A OS=Homo sapiens GN=CORO1A PE=1 SV=4	51678	6.25	-0.319	Tissue leakage										54	0.06	0.00371662	54	0.06	0.00370448	54	0.06	0.00370606
CPN2_HUMAN	Carboxypeptidase N subunit 2 OS=Homo sapiens GN=CPN2 PE=1 SV=3	61373	5.63	0.068	Coagulation	86	0.05	0.00835417	44	0.05	0.00654332	92	0.17	0.00951341										69	0.05	0.00953033	69	0.05	0.00945274
CRERF_HUMAN	CREB3 regulatory factor OS=Homo sapiens GN=CREBRF PE=1 SV=2	72674	4.76	-0.9	Tissue leakage	29	0.05	0.00989247	31	0.05	0.00774819	35	0.05	0.00331329													28	0.05	0.0111933	28	0.05	0.0112045
CRP_HUMAN	C-reactive protein OS=Homo sapiens GN=CRP PE=1 SV=1	25194	5.45	-0.032	Acute phase																			74	0.13	0.0101719	74	0.13	0.0100891	74	0.13	0.0100991
CSPG2_HUMAN	Versican core protein OS=Homo sapiens GN=VCAN PE=1 SV=3	374585	4.43	-0.516	Immunoglobulins										38	0.01	0.00448995	38	0.01	0.00447529				62	0.01	0.0116335	62	0.01	0.0115388
CTGF_HUMAN	Connective tissue growth factor OS=Homo sapiens GN=CTGF PE=1 SV=2	40289	8.43	-0.213	Acute phase	53	0.17	0.0186462	81	0.17	0.0146045	70	0.17	0.00624519
CTL1_HUMAN	Choline transporter-like protein 1 OS=Homo sapiens GN=SLC44A1 PE=1 SV=1	74793	8.93	0.546	Lipoproteins													42	0.04	0.0035743	42	0.04	0.00357583
CXCL7_HUMAN	Platelet basic protein OS=Homo sapiens GN=PPBP PE=1 SV=3	14171	9.04	-0.216	Acute phase	152	0.54	0.0208329	180	1.36	0.0410951	169	0.54	0.00697757	166	0.54	0.00917245	166	0.54	0.00914249	166	0.54	0.00914639	116	0.54	0.0237659	116	0.54	0.0235725	116	0.54	0.0235959
CYTC_HUMAN	Cystatin-C OS=Homo sapiens GN=CST3 PE=1 SV=1	16017	9	-0.112	Other plasma components				69	0.21	0.00717218	36	0.21	0.00306698										59	0.21	0.0104463	59	0.21	0.0103612	59	0.21	0.0103715
DCD_HUMAN	Dermcidin OS=Homo sapiens GN=DCD PE=1 SV=2	11391	6.08	-0.225	Tissue leakage	33	0.3	0.00930334	97	1.2	0.029147	107	1.2	0.0124639	55	1.87	0.0255326	55	1.87	0.0254492				107	0.3	0.0106131	107	0.3	0.0105267	107	0.3	0.0105372
DCDC5_HUMAN	Doublecortin domain-containing protein 5 OS=Homo sapiens GN=DCDC5 PE=2 SV=2	73676	9.05	-0.468	Other plasma components	30	0.05	0.0100289	27	0.04	0.00628401	28	0.04	0.00268718										29	0.04	0.00915265	29	0.04	0.00907813	29	0.04	0.00908715
DEF1_HUMAN	Neutrophil defensin 1 OS=Homo sapiens GN=DEFA1 PE=1 SV=1	10536	6.54	0.285	Other plasma components										39	0.33	0.00416755	39	0.33	0.00415394	39	0.33	0.00415571
DRA_HUMAN	HLA class II histocompatibility antigen, DR alpha chain OS=Homo sapiens GN=HLA-DRA PE=1 SV=1	28760	4.91	0.058	Immunoglobulins				34	0.12	0.00735904	31	0.12	0.00314688				29	0.12	0.00412326	29	0.12	0.00412502
EMIL1_HUMAN	EMILIN-1 OS=Homo sapiens GN=EMILIN1 PE=1 SV=2	107913	5.07	-0.388	Complement system	334	0.27	0.0793219	454	0.35	0.0805365	462	0.43	0.0423109	356	0.23	0.0297504	356	0.23	0.0296532	356	0.23	0.0296659	85	0.06	0.0201088	85	0.06	0.0199451	85	0.06	0.0199649
ENOA_HUMAN	Alpha-enolase OS=Homo sapiens GN=ENO1 PE=1 SV=2	47481	7.01	-0.221	Tissue leakage	53	0.14	0.0180969	74	0.07	0.0070871	95	0.14	0.00606119	129	0.22	0.0125208	129	0.22	0.01248	129	0.22	0.0124853
ENOB_HUMAN	Beta-enolase OS=Homo sapiens GN=ENO3 PE=1 SV=5	47299	7.59	-0.194	Tissue leakage				74	0.07	0.00705994	67	0.07	0.00301898	103	0.07	0.00396864	103	0.07	0.00395567	103	0.07	0.00395736
ENOG_HUMAN	Gamma-enolase OS=Homo sapiens GN=ENO2 PE=1 SV=3	47581	4.91	-0.188	Tissue leakage										54	0.07	0.0039923	54	0.07	0.00397926
ERIC5_HUMAN	Glutamate-rich protein 5 OS=Homo sapiens GN=ERICH5 PE=2 SV=1	40026	4.46	-0.893	Other plasma components													50	0.08	0.00382563	50	0.08	0.00382726
F13A_HUMAN	Coagulation factor XIII A chain OS=Homo sapiens GN=F13A1 PE=1 SV=4	83728	5.75	-0.391	Coagulation																						138	0.21	0.0541627	138	0.21	0.0542166
F13B_HUMAN	Coagulation factor XIII B chain OS=Homo sapiens GN=F13B PE=1 SV=3	77742	6.01	-0.551	Coagulation	60	0.09	0.0190482	43	0.09	0.0149193				57	0.09	0.00838667				57	0.09	0.00836284	166	0.04	0.00965776	166	0.04	0.00957913	166	0.04	0.00958865
FA11_HUMAN	Coagulation factor XI OS=Homo sapiens GN=F11 PE=1 SV=1	72116	8.47	-0.263	Coagulation	2891	2.48	0.486899	2556	2.97	0.456708	3778	3.96	0.260397	2735	2.97	0.256732	2735	2.97	0.255893	2735	2.97	0.256002	898	0.71	0.15902	898	0.71	0.157725	898	0.71	0.157882
FA12_HUMAN	Coagulation factor XII OS=Homo sapiens GN=F12 PE=1 SV=3	70029	8.04	-0.411	Coagulation	394	0.38	0.0724465	385	0.38	0.056743	368	0.32	0.0204333	466	0.38	0.0318972	466	0.38	0.031793	466	0.38	0.0318066	440	0.2	0.0434979	440	0.2	0.0431438	440	0.2	0.0431867
FA5_HUMAN	Coagulation factor V OS=Homo sapiens GN=F5 PE=1 SV=4	252686	5.68	-0.599	Coagulation	3780	0.85	0.584731	3803	0.9	0.484925	3302	0.97	0.223492	2891	0.87	0.263507	2891	0.87	0.262646	2891	0.87	0.262758	1818	0.57	0.447318	1818	0.57	0.443677	1818	0.57	0.444118
FA9_HUMAN	Coagulation factor IX OS=Homo sapiens GN=F9 PE=1 SV=2	53114	5.34	-0.377	Coagulation	45	0.06	0.00867593	60	0.06	0.00679534	45	0.06	0.00290583
FABPH_HUMAN	Fatty acid-binding protein, heart OS=Homo sapiens GN=FABP3 PE=1 SV=4	14906	6.29	-0.265	Lipoproteins													159	0.51	0.00908242	159	0.51	0.00908629
FAT2_HUMAN	Protocadherin Fat 2 OS=Homo sapiens GN=FAT2 PE=1 SV=2	482097	5	-0.25	Tissue leakage	31	0.01	0.0131247	49	0.01	0.0102798	56	0.01	0.00439587	44	0.01	0.00577864	44	0.01	0.00575977	44	0.01	0.00576222				75	0.01	0.0148506	75	0.01	0.0148654
FBLN1_HUMAN	Fibulin-1 OS=Homo sapiens GN=FBLN1 PE=1 SV=4	81268	5.07	-0.266	Coagulation	24	0.04	0.00884984				27	0.04	0.00296408													40	0.04	0.0100136	40	0.04	0.0100235
FBLN3_HUMAN	EGF-containing fibulin-like extracellular matrix protein 1 OS=Homo sapiens GN=EFEMP1 PE=1 SV=2	56885	4.95	-0.346	Complement system										65	0.06	0.0040911	65	0.06	0.00407774	65	0.06	0.00407948
FCGRN_HUMAN	IgG receptor FcRn large subunit p51 OS=Homo sapiens GN=FCGRT PE=1 SV=1	40060	6.09	-0.139	Immunoglobulins										29	0.08	0.00384142				29	0.08	0.00383051
FCN2_HUMAN	Ficolin-2 OS=Homo sapiens GN=FCN2 PE=1 SV=2	34436	6.31	-0.466	Coagulation	239	0.45	0.0421872	294	0.58	0.0425884	60	0.2	0.0062799	203	0.2	0.00825532	203	0.2	0.00822836	203	0.2	0.00823186	130	0.32	0.0342234	130	0.32	0.0339448	130	0.32	0.0339785
FCN3_HUMAN	Ficolin-3 OS=Homo sapiens GN=FCN3 PE=1 SV=2	33395	6.2	-0.447	Coagulation	15197	9.67	0.879151	17089	11.9	0.847382	17607	9.67	0.294454	4497	5.05	0.202145	4497	5.05	0.201485	4497	5.05	0.201571	4439	5.05	0.523762	4439	5.05	0.519497	4439	5.05	0.520014
FETUA_HUMAN	Alpha-2-HS-glycoprotein OS=Homo sapiens GN=AHSG PE=1 SV=1	40098	5.43	-0.196	Tissue leakage	1858	1.8	0.196495	1834	2.85	0.243679	2426	4.73	0.172939	1623	1.8	0.086514	1623	1.8	0.0862314	1623	1.8	0.0862682	1148	1.04	0.129514	1148	1.04	0.12846	1148	1.04	0.128587
FETUB_HUMAN	Fetuin-B OS=Homo sapiens GN=FETUB PE=1 SV=2	42883	6.46	-0.317	Tissue leakage	129	0.25	0.0291864	155	0.35	0.032004	111	0.16	0.00625626	64	0.16	0.00822425	64	0.16	0.00819739	64	0.16	0.00820088	31	0.08	0.0106546				31	0.08	0.0105783
FHR1_HUMAN	Complement factor H-related protein 1 OS=Homo sapiens GN=CFHR1 PE=1 SV=2	38766	7.38	-0.577	Complement system	1318	1.09	0.115036	1357	1.09	0.0901008	1374	1.9	0.0671606	1008	1.27	0.0590128	1008	1.27	0.05882	1008	1.27	0.0588451	1066	0.93	0.111968	1066	0.93	0.111057	1066	0.93	0.111167
FHR5_HUMAN	Complement factor H-related protein 5 OS=Homo sapiens GN=CFHR5 PE=1 SV=1	66430	6.81	-0.45	Complement system	58	0.05	0.00904253	50	0.16	0.0226639													143	0.1	0.0206312				143	0.1	0.0204836
FIBA_HUMAN	Fibrinogen alpha chain OS=Homo sapiens GN=FGA PE=1 SV=2	95656	5.7	-0.822	Coagulation	10106	5.58	1.45312	11323	7.06	1.44002	16981	11.48	1.0013	16238	11.48	1.31627	16238	11.48	1.31197	16238	11.48	1.31253	6457	2.59	0.769437	6457	2.59	0.763172	6457	2.59	0.763931
FIBB_HUMAN	Fibrinogen beta chain OS=Homo sapiens GN=FGB PE=1 SV=2	56577	8.54	-0.758	Coagulation	25437	268	41.2791	22281	253.22	30.5484	26832	1103.91	56.9487	29096	985.83	66.8549	29096	985.83	66.6365	29096	985.83	66.6649	10385	101.93	17.9103	10385	101.93	17.7645	10385	101.93	17.7821
FIBG_HUMAN	Fibrinogen gamma chain OS=Homo sapiens GN=FGG PE=1 SV=3	52106	5.37	-0.588	Coagulation	10488	16.89	2.39592	10730	24.85	2.76099	15702	43.92	2.0867	13688	34.14	2.13227	13688	34.14	2.12531	13688	34.14	2.12621	7821	18.02	2.91611	7821	18.02	2.89236	7821	18.02	2.89524
FINC_HUMAN	Fibronectin OS=Homo sapiens GN=FN1 PE=1 SV=4	266052	5.46	-0.543	Acute phase	1635	0.41	0.296966	1871	0.51	0.289326	2347	0.48	0.116444	798	0.29	0.0924817	798	0.29	0.0921796	798	0.29	0.0922189	2441	0.25	0.20657	2441	0.25	0.204888	2441	0.25	0.205092
FLNA_HUMAN	Filamin-A OS=Homo sapiens GN=FLNA PE=1 SV=4	283301	5.7	-0.317	Coagulation	615	0.21	0.161966	638	0.26	0.157062	707	0.32	0.0826624	3196	0.43	0.146018	3196	0.43	0.145542	3196	0.43	0.145604				1480	0.49	0.427617	1480	0.49	0.428042
FLNC_HUMAN	Filamin-C OS=Homo sapiens GN=FLNC PE=1 SV=3	293407	5.65	-0.32	Coagulation	38	0.01	0.00798778	75	0.02	0.0125127	76	0.02	0.0053507	149	0.02	0.00703383	149	0.02	0.00701085	149	0.02	0.00701384
FSD1_HUMAN	Fibronectin type III and SPRY domain-containing protein 1 OS=Homo sapiens GN=FSD1 PE=1 SV=1	56240	6.55	-0.39	Immunoglobulins				27	0.06	0.00719528	41	0.06	0.00307685
FSD2_HUMAN	Fibronectin type III and SPRY domain-containing protein 2 OS=Homo sapiens GN=FSD2 PE=1 SV=1	86415	4.81	-0.581	Immunoglobulins																			32	0.04	0.0107352	32	0.04	0.0106478	32	0.04	0.0106584
G3P_HUMAN	Glyceraldehyde-3-phosphate dehydrogenase OS=Homo sapiens GN=GAPDH PE=1 SV=3	36201	8.57	-0.108	Tissue leakage	463	1.4	0.137976	483	1.2	0.0926302	535	1.4	0.0462124	507	0.69	0.0299406	507	0.69	0.0298428	507	0.69	0.0298556
GBB1_HUMAN	Guanine nucleotide-binding protein G(I)/G(S)/G(T) subunit beta-1 OS=Homo sapiens GN=GNB1 PE=1 SV=3	38151	5.6	-0.231	Coagulation	101	0.18	0.0186954	105	0.28	0.022778	118	0.39	0.0135669	196	0.39	0.0178345	196	0.39	0.0177763	196	0.39	0.0177839
GELS_HUMAN	Gelsolin OS=Homo sapiens GN=GSN PE=1 SV=1	86043	5.9	-0.415	Tissue leakage	1362	0.75	0.175684	1584	0.89	0.163289	1658	1.45	0.113761	2359	1.36	0.140264	2359	1.36	0.139806	2359	1.36	0.139865	612	0.45	0.120251	612	0.45	0.119272	612	0.45	0.119391
GNAI2_HUMAN	Guanine nucleotide-binding protein G(i) subunit alpha-2 OS=Homo sapiens GN=GNAI2 PE=1 SV=3	40995	5.34	-0.364	Coagulation	160	0.47	0.0524547	461	1.01	0.0882883	374	0.72	0.0269137	271	0.26	0.012776	271	0.26	0.0127343	271	0.26	0.0127397
GNAQ_HUMAN	Guanine nucleotide-binding protein G(q) subunit alpha OS=Homo sapiens GN=GNAQ PE=1 SV=4	42400	5.48	-0.44	Lipoproteins													74	0.16	0.00810506	74	0.16	0.00810851
GP1BA_HUMAN	Platelet glycoprotein Ib alpha chain OS=Homo sapiens GN=GP1BA PE=1 SV=2	72008	5.87	-0.198	Coagulation													142	0.09	0.00774272	142	0.09	0.00774602
GP1BB_HUMAN	Platelet glycoprotein Ib beta chain OS=Homo sapiens GN=GP1BB PE=1 SV=1	22274	9.67	0.311	Coagulation	129	0.32	0.0194046	99	0.32	0.0151984	105	0.32	0.00649917	190	0.32	0.00854357	190	0.32	0.00851566	190	0.32	0.00851929				140	0.32	0.0219563	140	0.32	0.0219781
GPIX_HUMAN	Platelet glycoprotein IX OS=Homo sapiens GN=GP9 PE=1 SV=3	19547	5.89	0.284	Coagulation	74	0.17	0.00904659	74	0.17	0.00708565	147	0.17	0.00302997	171	0.17	0.00398309	171	0.17	0.00397008	171	0.17	0.00397177
GPX3_HUMAN	Glutathione peroxidase 3 OS=Homo sapiens GN=GPX3 PE=1 SV=2	25765	8.26	-0.221	Other plasma components	255	0.84	0.0589203	244	0.84	0.0461488	240	0.84	0.0197342	473	1.35	0.0416922	473	1.35	0.0415561	473	1.35	0.0415738	93	0.28	0.0224052	93	0.28	0.0222228	93	0.28	0.0222449
GTR1_HUMAN	Solute carrier family 2, facilitated glucose transporter member 1 OS=Homo sapiens GN=SLC2A1 PE=1 SV=2	54391	8.93	0.534	Tissue leakage	162	0.19	0.0281343	137	0.12	0.0139174	101	0.12	0.00595139	124	0.12	0.00782347	124	0.12	0.00779792	124	0.12	0.00780124
GTR3_HUMAN	Solute carrier family 2, facilitated glucose transporter member 3 OS=Homo sapiens GN=SLC2A3 PE=1 SV=1	54345	6.84	0.536	Tissue leakage										102	0.06	0.00390843	102	0.06	0.00389566	102	0.06	0.00389732
H2A1B_HUMAN	Histone H2A type 1-B/E OS=Homo sapiens GN=HIST1H2AB PE=1 SV=2	14127	11.05	-0.478	Tissue leakage				73	0.24	0.00722956	155	0.54	0.0069559	104	0.24	0.00406399	104	0.24	0.00405071	104	0.24	0.00405244
H32_HUMAN	Histone H3.2 OS=Homo sapiens GN=HIST2H3A PE=1 SV=3	15436	11.27	-0.604	Tissue leakage				111	0.22	0.00724116	69	0.22	0.00309647	98	0.22	0.00407051				98	0.22	0.00405894
H4_HUMAN	Histone H4 OS=Homo sapiens GN=HIST1H4A PE=1 SV=2	11360	11.36	-0.521	Tissue leakage				28	0.3	0.00726692	27	0.3	0.00310749	60	0.7	0.00953164	60	0.7	0.00950051	60	0.7	0.00950456
HABP2_HUMAN	Hyaluronan-binding protein 2 OS=Homo sapiens GN=HABP2 PE=1 SV=1	64740	6.09	-0.545	Coagulation	434	0.56	0.0986998	380	0.28	0.0386529	881	0.9	0.0531282	144	0.35	0.0271601	144	0.35	0.0270714	144	0.35	0.027083				72	0.05	0.00997133	72	0.05	0.00998124
HBA_HUMAN	Hemoglobin subunit alpha OS=Homo sapiens GN=HBA1 PE=1 SV=2	15305	8.72	0.048	Other plasma components	1418	8.05	0.335417	1030	15.51	0.50617	1307	6.41	0.0894543	792	8.05	0.14768	792	8.05	0.147197	792	8.05	0.14726	102	0.49	0.0232911	102	0.49	0.0231015	102	0.49	0.0231244
HBB_HUMAN	Hemoglobin subunit beta OS=Homo sapiens GN=HBB PE=1 SV=2	16102	6.75	0.014	Other plasma components	1439	7.19	0.315184	1354	13.52	0.464202	1450	20.28	0.297754	1046	13.52	0.260944	1046	13.52	0.260092	1046	13.52	0.260203	258	1.15	0.0575094	258	1.15	0.0570411	258	1.15	0.0570978
HBD_HUMAN	Hemoglobin subunit delta OS=Homo sapiens GN=HBD PE=1 SV=2	16159	7.85	-0.046	Other plasma components	563	1.14	0.0501505	560	2.12	0.0730468	595	2.78	0.0409609
HEMO_HUMAN	Hemopexin OS=Homo sapiens GN=HPX PE=1 SV=2	52385	6.55	-0.434	Acute phase	2527	1.65	0.235313	2725	4.86	0.542868	1917	1.82	0.0869337	1508	1.5	0.0941867	1508	1.5	0.093879	1508	1.5	0.093919	1632	1.5	0.244039	1632	1.5	0.242052	1632	1.5	0.242293
HEP2_HUMAN	Heparin cofactor 2 OS=Homo sapiens GN=SERPIND1 PE=1 SV=3	57205	6.41	-0.236	Complement system	376	0.4	0.0622945	360	0.56	0.0683082	582	0.56	0.02921	264	0.4	0.0274274	264	0.4	0.0273378	264	0.4	0.0273495	326	0.4	0.0710648	326	0.4	0.0704863	326	0.4	0.0705563
HGFA_HUMAN	Hepatocyte growth factor activator OS=Homo sapiens GN=HGFAC PE=1 SV=1	72860	6.99	-0.298	Tissue leakage	166	0.14	0.0277698	79	0.05	0.00776802	91	0.14	0.00930095
HORN_HUMAN	Hornerin OS=Homo sapiens GN=HRNR PE=1 SV=2	283140	10.05	-1.364	Tissue leakage				49	0.01	0.00603743	109	0.03	0.0077452	38	0.01	0.00339385	38	0.01	0.00338276
HPT_HUMAN	Haptoglobin OS=Homo sapiens GN=HP PE=1 SV=1	45861	6.13	-0.421	Acute phase	986	1.65	0.206008	1142	2.26	0.221005	806	1.15	0.0480896	689	1	0.0549711	689	1	0.0547916	689	1	0.0548149	1504	2.5	0.356077	1504	2.5	0.353178	1504	2.5	0.353529
HPTR_HUMAN	Haptoglobin-related protein OS=Homo sapiens GN=HPR PE=2 SV=2	39518	6.63	-0.307	Acute phase	1177	1.62	0.174287	1276	2.08	0.175271	1059	1.42	0.0511674	947	1.42	0.0672627	947	1.42	0.067043	947	1.42	0.0670716	894	1.06	0.130095	894	1.06	0.129036	894	1.06	0.129164
HRG_HUMAN	Histidine-rich glycoprotein OS=Homo sapiens GN=HRG PE=1 SV=1	60510	7.09	-0.957	Coagulation	652	0.24	0.0395361	571	0.37	0.0477397	642	0.37	0.0204145	1918	1.21	0.0877614	1918	1.21	0.0874748	1918	1.21	0.0875121	1000	0.7	0.131549	1000	0.7	0.130478	1000	0.7	0.130607
HSP7C_HUMAN	Heat shock cognate 71 kDa protein OS=Homo sapiens GN=HSPA8 PE=1 SV=1	71082	5.37	-0.456	Tissue leakage	152	0.15	0.0290273	140	0.2	0.0303138	151	0.25	0.0162035				229	0.09	0.00764315	229	0.09	0.00764641
HV102_HUMAN	Ig heavy chain V-I region HG3 OS=Homo sapiens PE=3 SV=1	13108	9.1	-0.278	Immunoglobulins	129	0.59	0.0210545	102	0.26	0.00726709	62	0.59	0.00705177	101	0.59	0.00927				101	0.59	0.00924366
HV307_HUMAN	Ig heavy chain V-III region CAM OS=Homo sapiens PE=1 SV=1	13773	9.65	-0.051	Immunoglobulins	177	0.61	0.0210391	198	0.61	0.0164787	180	0.27	0.003119	297	0.27	0.00410013	297	0.27	0.00408673	297	0.27	0.00408848	211	0.56	0.023954	211	0.56	0.0237589	211	0.56	0.0237826
HV311_HUMAN	Ig heavy chain V-III region TRO OS=Homo sapiens PE=1 SV=1	13578	9.74	-0.012	Immunoglobulins	32	0.25	0.00924127	51	0.57	0.016503	29	0.57	0.00705701	50	0.25	0.00406881	50	0.25	0.00405552	50	0.25	0.00405725
HV313_HUMAN	Ig heavy chain V-III region BRO OS=Homo sapiens PE=1 SV=1	13332	6.45	0.066	Immunoglobulins	695	0.98	0.0355694	784	1.49	0.0423577				1266	1.49	0.0238107	1266	1.49	0.023733	1266	1.49	0.0237431	561	0.98	0.0405772	561	0.98	0.0402468	561	0.98	0.0402868
HV320_HUMAN	Ig heavy chain V-III region GAL OS=Homo sapiens PE=1 SV=1	12836	8.7	-0.059	Immunoglobulins	144	1.03	0.0359934	151	1.57	0.0429715	131	1.57	0.0183755	169	1.03	0.0158474	169	1.03	0.0157956	169	1.03	0.0158024	257	1.03	0.0410608	257	1.03	0.0407265	257	1.03	0.040767
HV323_HUMAN	Ig heavy chain V-III region 23 OS=Homo sapiens GN=IGHV3-23 PE=1 SV=2	12745	8.49	0.073	Immunoglobulins	324	1.06	0.0361789				416	1.06	0.0121174	155	0.61	0.00931882	437	1.06	0.0158771	155	0.61	0.00929234	244	0.61	0.0241452				244	0.61	0.0239724
HV330_HUMAN	Ig heavy chain V-III region GA OS=Homo sapiens PE=1 SV=1	13271	9.8	-0.048	Immunoglobulins				37	0.98	0.027732	53	0.98	0.0118588	50	0.58	0.0092262	50	0.58	0.00919606	50	0.58	0.00919998				43	0.26	0.0106289	43	0.26	0.0106394
HV333_HUMAN	Ig heavy chain V-III region HIL OS=Homo sapiens PE=1 SV=1	13671	9.43	-0.054	Immunoglobulins	40	0.25	0.00930456	69	0.25	0.00728771	57	0.25	0.00311638	56	0.25	0.00409668	56	0.25	0.00408329	56	0.25	0.00408503
HV348_HUMAN	Ig heavy chain V-III region WEA OS=Homo sapiens PE=1 SV=1	12363	8.7	0.076	Immunoglobulins	58	0.63	0.0212041	86	1.09	0.0287343	75	1.09	0.0122874	75	0.63	0.00933589	75	0.63	0.00930539	75	0.63	0.00930936
HV353_HUMAN	Ig heavy chain V-III region BUT OS=Homo sapiens PE=1 SV=1	12485	9.34	0.017	Immunoglobulins	172	2.38	0.0808949	223	3.31	0.0881186	175	2.38	0.0270941	266	1.08	0.0161623	266	1.08	0.0161095	266	1.08	0.0161164	274	0.63	0.0244281	274	0.63	0.0242292	274	0.63	0.0242533
HV434_HUMAN	Ig heavy chain V-II region ARH-77 OS=Homo sapiens PE=4 SV=1	16389	8.45	-0.076	Immunoglobulins	535	0.75	0.0334634	489	0.75	0.0262099	600	0.75	0.0112079	527	0.75	0.0147335	527	0.75	0.0146853	527	0.75	0.0146916	313	0.75	0.0381746	313	0.75	0.0378638	313	0.75	0.0379014
HV439_HUMAN	Ig heavy chain V-II region WAH OS=Homo sapiens PE=1 SV=1	14222	8.62	-0.017	Immunoglobulins	68	0.24	0.0092924	73	0.24	0.00727818	68	0.24	0.0031123	110	0.24	0.00409132	110	0.24	0.00407795	110	0.24	0.00407969	151	0.24	0.0106007	151	0.24	0.0105143	151	0.24	0.0105248
IBP2_HUMAN	Insulin-like growth factor-binding protein 2 OS=Homo sapiens GN=IGFBP2 PE=1 SV=2	35875	7.48	-0.44	Other plasma components	94	0.19	0.0185567	66	0.09	0.00688471				36	0.09	0.00387013	36	0.09	0.00385749
IBP4_HUMAN	Insulin-like growth factor-binding protein 4 OS=Homo sapiens GN=IGFBP4 PE=1 SV=2	29113	6.81	-0.493	Other plasma components	42	0.11	0.00871837	37	0.24	0.0148987	81	0.11	0.00292005
IC1_HUMAN	Plasma protease C1 inhibitor OS=Homo sapiens GN=SERPING1 PE=1 SV=2	55347	6.09	-0.125	Coagulation	1309	1	0.150678	1262	1	0.118017	1167	1	0.0504666	463	0.41	0.0272	463	0.41	0.0271112	463	0.41	0.0271227	638	0.5	0.0859458	638	0.5	0.0852461	638	0.5	0.0853308
IDHP_HUMAN	Isocitrate dehydrogenase [NADP], mitochondrial OS=Homo sapiens GN=IDH2 PE=1 SV=2	51333	8.88	-0.397	Tissue leakage													87	0.06	0.00367975	87	0.06	0.00368132
IGHA1_HUMAN	Ig alpha-1 chain C region OS=Homo sapiens GN=IGHA1 PE=1 SV=2	38486	6.08	-0.206	Immunoglobulins	3997	3.06	0.320612	4282	4.2	0.34467	5036	5.13	0.180024	3724	3.79	0.174837	3724	3.79	0.174266	3724	3.79	0.17434	1460	1.28	0.152994	1460	1.28	0.151748	1460	1.28	0.151899
IGHA2_HUMAN	Ig alpha-2 chain C region OS=Homo sapiens GN=IGHA2 PE=1 SV=3	37301	5.71	-0.268	Immunoglobulins	2819	2.29	0.232548	3009	2.9	0.230658	3842	3.62	0.123123	2610	2.29	0.102388	2610	2.29	0.102053	2610	2.29	0.102097	1557	0.98	0.113529	1557	0.98	0.112605	1557	0.98	0.112717
IGHD_HUMAN	Ig delta chain C region OS=Homo sapiens GN=IGHD PE=1 SV=2	42683	8.13	-0.566	Immunoglobulins	166	0.16	0.0185922	170	0.25	0.0227534	84	0.16	0.00622709	146	0.16	0.00818589	146	0.16	0.00815916	146	0.16	0.00816263	41	0.08	0.0106049	41	0.08	0.0105185
IGHG1_HUMAN	Ig gamma-1 chain C region OS=Homo sapiens GN=IGHG1 PE=1 SV=1	36596	8.46	-0.428	Immunoglobulins	6917	12.43	1.2384	7127	19.71	1.53805	9689	48.23	1.60939	8343	23.62	1.03611	8343	23.62	1.03272	8343	23.62	1.03316	6986	19.71	2.24017	6986	19.71	2.22193	6986	19.71	2.22414
IGHG2_HUMAN	Ig gamma-2 chain C region OS=Homo sapiens GN=IGHG2 PE=1 SV=2	36505	7.66	-0.419	Immunoglobulins	5452	9.43	0.937173	5373	9.43	0.734032	6300	21.79	0.725303	4628	16.56	0.724609	4628	16.56	0.722243	4628	16.56	0.72255	2871	7.04	0.798152	2871	7.04	0.791654	2871	7.04	0.792441
IGHG3_HUMAN	Ig gamma-3 chain C region OS=Homo sapiens GN=IGHG3 PE=1 SV=2	42287	8.23	-0.511	Immunoglobulins	3967	3.18	0.366092	3848	3.5	0.315592	4495	7.22	0.27839	4405	4.23	0.214407	4405	4.23	0.213706	4405	4.23	0.213798	4469	4.64	0.609376	4469	4.64	0.604415	4469	4.64	0.605016
IGHG4_HUMAN	Ig gamma-4 chain C region OS=Homo sapiens GN=IGHG4 PE=1 SV=1	36431	7.18	-0.423	Immunoglobulins	1993	2.1	0.208279	2150	2.69	0.208965	2410	3.8	0.126231	2743	4.23	0.184715	2743	4.23	0.184112	2743	4.23	0.18419	2482	2.39	0.270414	2482	2.39	0.268213	2482	2.39	0.268479
IGHM_HUMAN	Ig mu chain C region OS=Homo sapiens GN=IGHM PE=1 SV=3	49960	6.35	-0.319	Immunoglobulins	11218	8.36	1.13706	12248	16.74	1.78332	18630	20.49	0.933414	13437	17.91	1.07253	13437	17.91	1.06903	13437	17.91	1.06948	10239	12.74	1.97675	10239	12.74	1.96066	10239	12.74	1.96261
IGJ_HUMAN	Immunoglobulin J chain OS=Homo sapiens GN=JCHAIN PE=1 SV=4	18543	5.12	-0.338	Immunoglobulins	322	1.73	0.0873337	351	1.73	0.0684033	292	1.73	0.0292507	292	0.95	0.0211152	292	0.95	0.0210462	292	0.95	0.0210552	254	1.73	0.0996293	254	1.73	0.0988181	254	1.73	0.0989163
IGKC_HUMAN	Ig kappa chain C region OS=Homo sapiens GN=IGKC PE=1 SV=1	11773	5.58	-0.537	Immunoglobulins	9365	35.21	1.12852	10677	167.59	4.20713	13382	216.85	2.32786	12079	469.1	6.61978	12079	469.1	6.59816	12079	469.1	6.60097	9179	59.46	2.17407	9179	59.46	2.15637	9179	59.46	2.15851
IGLC1_HUMAN	Ig lambda-1 chain C regions OS=Homo sapiens GN=IGLC1 PE=1 SV=1	11512	7.89	-0.52	Immunoglobulins	1771	3.79	0.118781	1949	3.79	0.0930338				1598	7.06	0.0974197	1598	7.06	0.0971015	1598	7.06	0.0971429	1155	3.79	0.135504	1155	3.79	0.1344
IGLC2_HUMAN	Ig lambda-2 chain C regions OS=Homo sapiens GN=IGLC2 PE=1 SV=1	11458	6.92	-0.444	Immunoglobulins	2521	3.85	0.120095	2583	5.32	0.129978	3172	9.69	0.101238	2427	9.69	0.133083	2427	9.69	0.132649	2427	9.69	0.132705	3071	7.22	0.256925	3071	7.22	0.254833	3071	7.22	0.255087
ILK_HUMAN	Integrin-linked protein kinase OS=Homo sapiens GN=ILK PE=1 SV=2	51899	8.3	-0.412	Coagulation				90	0.13	0.0143864	143	0.13	0.00615194	240	0.2	0.0124417	240	0.2	0.0124011	240	0.2	0.0124064				91	0.06	0.00959225	91	0.06	0.00960179
IPSP_HUMAN	Plasma serine protease inhibitor OS=Homo sapiens GN=SERPINA5 PE=1 SV=3	45760	9.3	-0.115	Coagulation	1617	1.47	0.18313	1809	2.27	0.221494	2282	2.05	0.0855362	1222	1.65	0.0905026	1222	1.65	0.090207	1222	1.65	0.0902455	1212	1.47	0.208912	1212	1.47	0.207211	1212	1.47	0.207417
ITA2B_HUMAN	Integrin alpha-IIb OS=Homo sapiens GN=ITGA2B PE=1 SV=3	114446	5.21	-0.108	Coagulation	829	0.44	0.137091	770	0.48	0.117137	1025	0.57	0.059482	1999	0.57	0.0781928	1999	0.57	0.0779374	1999	0.57	0.0779706				159	0.09	0.0317288	159	0.09	0.0317603
ITA6_HUMAN	Integrin alpha-6 OS=Homo sapiens GN=ITGA6 PE=1 SV=5	127724	6.21	-0.405	Coagulation										105	0.03	0.00459288	105	0.03	0.00457788	105	0.03	0.00457983
ITB1_HUMAN	Integrin beta-1 OS=Homo sapiens GN=ITGB1 PE=1 SV=2	91664	5.27	-0.404	Coagulation	34	0.04	0.00998193	33	0.07	0.0136819	38	0.04	0.00334325	93	0.04	0.00439491	93	0.04	0.00438056	93	0.04	0.00438242
ITB2_HUMAN	Integrin beta-2 OS=Homo sapiens GN=ITGB2 PE=1 SV=2	87976	6.67	-0.316	Coagulation	76	0.04	0.00958032	56	0.04	0.00750369	29	0.04	0.00320874
ITB3_HUMAN	Integrin beta-3 OS=Homo sapiens GN=ITGB3 PE=1 SV=2	90194	5.09	-0.332	Coagulation	320	0.28	0.068753	336	0.48	0.0923145	309	0.28	0.0230274	1015	0.38	0.0410821	1015	0.38	0.0409479	1015	0.38	0.0409654				238	0.15	0.0416754	238	0.15	0.0417168
ITIH1_HUMAN	Inter-alpha-trypsin inhibitor heavy chain H1 OS=Homo sapiens GN=ITIH1 PE=1 SV=3	101782	6.31	-0.282	Other plasma components	1384	0.66	0.182882	1429	0.71	0.154092	1840	1.35	0.12529	541	0.37	0.0451402	541	0.37	0.0449928	541	0.37	0.045012	912	0.56	0.177019	912	0.56	0.175578	912	0.56	0.175752
ITIH2_HUMAN	Inter-alpha-trypsin inhibitor heavy chain H2 OS=Homo sapiens GN=ITIH2 PE=1 SV=2	106853	6.4	-0.293	Other plasma components	1147	0.77	0.223992	1124	0.72	0.164048	1237	0.62	0.0604071	560	0.44	0.0563548	560	0.44	0.0561707	560	0.44	0.0561946	718	0.44	0.146016	718	0.44	0.144827	718	0.44	0.144971
ITIH4_HUMAN	Inter-alpha-trypsin inhibitor heavy chain H4 OS=Homo sapiens GN=ITIH4 PE=1 SV=4	103521	6.51	-0.315	Other plasma components	3990	2.58	0.727116	4032	2.58	0.569507	2803	1.79	0.168963	6794	4.04	0.501304	6794	4.04	0.499666	6794	4.04	0.499879	1806	1.05	0.337581	1806	1.05	0.334833	1806	1.05	0.335166
K0100_HUMAN	Protein KIAA0100 OS=Homo sapiens GN=KIAA0100 PE=1 SV=3	256105	6.71	-0.263	Tissue leakage																						27	0.01	0.00788912	27	0.01	0.00789696
K1C10_HUMAN	Keratin, type I cytoskeletal 10 OS=Homo sapiens GN=KRT10 PE=1 SV=6	59020	5.13	-0.624	Tissue leakage	3932	4.09	0.657171	4726	6.43	0.80921	5520	7.74	0.416534	4197	5.32	0.376359	4197	5.32	0.375129	4197	5.32	0.375289	3034	4.37	0.801016	3034	4.37	0.794495	3034	4.37	0.795285
K1C14_HUMAN	Keratin, type I cytoskeletal 14 OS=Homo sapiens GN=KRT14 PE=1 SV=4	51872	5.09	-0.537	Tissue leakage	434	0.74	0.104501	965	2.03	0.224533	1191	2.88	0.136218	1431	1.85	0.115026	1431	1.85	0.11465	1431	1.85	0.114699	1826	3.13	0.504241	1826	3.13	0.500136	1826	3.13	0.500633
K1C16_HUMAN	Keratin, type I cytoskeletal 16 OS=Homo sapiens GN=KRT16 PE=1 SV=4	51578	4.99	-0.517	Tissue leakage	356	0.64	0.089867	1057	2.24	0.246356	1401	2.9	0.136387	1968	2.9	0.179289	1968	2.9	0.178703	1968	2.9	0.17878	1658	2.45	0.392456	1658	2.45	0.389261	1658	2.45	0.389648
K1C17_HUMAN	Keratin, type I cytoskeletal 17 OS=Homo sapiens GN=KRT17 PE=1 SV=2	48361	4.97	-0.611	Tissue leakage				271	0.39	0.0402171	299	0.39	0.0171977				177	0.22	0.0127113	177	0.22	0.0127167	486	0.59	0.0886152	486	0.59	0.0878937
K1C27_HUMAN	Keratin, type I cytoskeletal 27 OS=Homo sapiens GN=KRT27 PE=1 SV=2	50419	4.98	-0.491	Tissue leakage				125	0.14	0.0150513	299	0.29	0.0133322	222	0.14	0.00846084				222	0.14	0.0084368	278	0.21	0.0328832	278	0.21	0.0326155	278	0.21	0.0326479
K1C9_HUMAN	Keratin, type I cytoskeletal 9 OS=Homo sapiens GN=KRT9 PE=1 SV=3	62255	5.14	-0.701	Tissue leakage	2866	2.62	0.444049	5109	8.62	1.14428	5346	9.13	0.518269	4539	4.46	0.332813	4539	4.46	0.331726	4539	4.46	0.331867	1637	2.1	0.406026	1637	2.1	0.402721	1637	2.1	0.403121
K22E_HUMAN	Keratin, type II cytoskeletal 2 epidermal OS=Homo sapiens GN=KRT2 PE=1 SV=2	65678	8.07	-0.471	Tissue leakage	2312	2.23	0.398732	2700	2.92	0.408934	2971	3.77	0.225773	2429	3.32	0.261366	2429	3.32	0.260512	2429	3.32	0.260623	2004	1.93	0.393675	2004	1.93	0.39047	2004	1.93	0.390858
K2C1_HUMAN	Keratin, type II cytoskeletal 1 OS=Homo sapiens GN=KRT1 PE=1 SV=6	66170	8.15	-0.626	Tissue leakage	5278	5.95	1.07185	7538	14.09	1.98803	9582	12.05	0.72704	6483	9.24	0.732866	6483	9.24	0.730472	6483	9.24	0.730783	7018	5.31	1.09123	7018	5.31	1.08235	7018	5.31	1.08342
K2C5_HUMAN	Keratin, type II cytoskeletal 5 OS=Homo sapiens GN=KRT5 PE=1 SV=3	62568	7.59	-0.428	Tissue leakage	443	0.43	0.0732447	758	1.05	0.140085	799	0.85	0.0484932	590	0.85	0.0637474	590	0.85	0.0635392	590	0.85	0.0635663	1176	0.95	0.184602	1176	0.95	0.183099	1176	0.95	0.183281
K2C6C_HUMAN	Keratin, type II cytoskeletal 6C OS=Homo sapiens GN=KRT6C PE=1 SV=3	60273	8.09	-0.432	Tissue leakage													615	1	0.0720101	615	1	0.0720408
K2C78_HUMAN	Keratin, type II cytoskeletal 78 OS=Homo sapiens GN=KRT78 PE=2 SV=2	57629	5.79	-0.471	Tissue leakage																			105	0.06	0.0107387	105	0.06	0.0106513
KAIN_HUMAN	Kallistatin OS=Homo sapiens GN=SERPINA4 PE=1 SV=3	48682	7.33	-0.069	Coagulation	173	0.3	0.0397599	214	0.58	0.060207	207	0.39	0.0173118	158	0.14	0.00816935	158	0.14	0.00814267	158	0.14	0.00814614	113	0.14	0.0211669	113	0.14	0.0209946	113	0.14	0.0210154
KI13A_HUMAN	Kinesin-like protein KIF13A OS=Homo sapiens GN=KIF13A PE=1 SV=2	203836	5.43	-0.551	Tissue leakage				25	0.02	0.00869284	38	0.02	0.00371724				43	0.02	0.00487059	43	0.02	0.00487266
KIF1A_HUMAN	Kinesin-like protein KIF1A OS=Homo sapiens GN=KIF1A PE=1 SV=2	192541	5.86	-0.503	Tissue leakage	32	0.02	0.0104836	41	0.02	0.00821115
KLKB1_HUMAN	Plasma kallikrein OS=Homo sapiens GN=KLKB1 PE=1 SV=1	73433	8.6	-0.263	Coagulation	720	0.55	0.109954	858	0.76	0.119002	760	0.93	0.0622708	399	0.48	0.0422497	399	0.48	0.0421117	399	0.48	0.0421297	158	0.24	0.0547348	158	0.24	0.0542891	158	0.24	0.0543431
KNG1_HUMAN	Kininogen-1 OS=Homo sapiens GN=KNG1 PE=1 SV=2	72996	6.34	-0.757	Coagulation	3329	1.87	0.371618	3570	3.27	0.508977	3399	2.58	0.171723	2664	1.75	0.153119	2664	1.75	0.152619	2664	1.75	0.152684	1816	1.21	0.274312	1816	1.21	0.272079	1816	1.21	0.272349
KPYM_HUMAN	Pyruvate kinase PKM OS=Homo sapiens GN=PKM PE=1 SV=4	58470	7.96	-0.128	Tissue leakage	94	0.12	0.0191016	63	0.06	0.00748058	228	0.18	0.00959656	182	0.12	0.00841019	182	0.12	0.00838272	182	0.12	0.00838629
KV105_HUMAN	Ig kappa chain V-I region CAR OS=Homo sapiens PE=1 SV=1	11810	9.47	-0.121	Immunoglobulins	162	0.26	0.00916215	193	0.26	0.00717617	165	0.26	0.00306868	205	0.26	0.00403397	205	0.26	0.0040208	205	0.26	0.00402251	186	0.26	0.0104521	186	0.26	0.010367	186	0.26	0.0103773
KV113_HUMAN	Ig kappa chain V-I region Lay OS=Homo sapiens PE=1 SV=1	11941	7.96	-0.008	Immunoglobulins	29	0.29	0.00942745	58	1.13	0.028772							78	0.66	0.00941575	78	0.66	0.00941976
KV116_HUMAN	Ig kappa chain V-I region BAN OS=Homo sapiens PE=1 SV=1	11947	8.6	-0.041	Immunoglobulins													67	0.66	0.00942048	67	0.66	0.0094245
KV117_HUMAN	Ig kappa chain V-I region Scw OS=Homo sapiens PE=1 SV=1	11871	5.67	-0.211	Immunoglobulins	809	2.52	0.0819625	753	2.52	0.0641963	763	4.83	0.0526158	749	4.83	0.0691667	749	4.83	0.0689408	749	4.83	0.0689702	864	2.52	0.0935019	876	1.14	0.0416872	876	1.14	0.0417286
KV139_HUMAN	Ig kappa chain V-I region Mev OS=Homo sapiens PE=1 SV=1	11977	6.29	-0.131	Immunoglobulins	25	0.28	0.00912981	30	0.29	0.00740623				739	6.64	0.0945849	739	6.64	0.094276	739	6.64	0.0943162	904	3.59	0.132501	904	3.59	0.131422	904	3.59	0.131552
KV230_HUMAN	Ig kappa chain V-II region RPMI 6410 OS=Homo sapiens PE=4 SV=1	14811	9.34	-0.237	Immunoglobulins	252	0.51	0.0205641	275	0.51	0.0161067	148	0.86	0.0116143	184	0.51	0.00905411	184	0.51	0.00902454	184	0.51	0.00902838	161	0.51	0.0234593	161	0.51	0.0232683	161	0.51	0.0232914
KV311_HUMAN	Ig kappa chain V-III region IARC/BL41 OS=Homo sapiens PE=4 SV=1	14175	6.21	-0.111	Immunoglobulins	147	0.27	0.00932123	83	0.24	0.00725413	74	0.24	0.00310202	84	0.24	0.0040778	84	0.24	0.00406448	84	0.24	0.00406621	116	0.27	0.0106335				116	0.27	0.0105575
KV315_HUMAN	Ig kappa chain V-III region CLL OS=Homo sapiens PE=4 SV=2	14380	8.71	-0.081	Immunoglobulins	86	0.24	0.00939563	73	0.53	0.0162512	76	0.53	0.00694936	143	0.53	0.00913537	143	0.53	0.00910553	143	0.53	0.00910941	132	0.53	0.0236699	132	0.53	0.0234771	132	0.53	0.0235005
KV320_HUMAN	Ig kappa chain V-III region B6 OS=Homo sapiens PE=1 SV=1	11742	9.34	-0.13	Immunoglobulins	330	1.29	0.0380552	404	1.29	0.0298064	527	1.79	0.0191648	396	2.01	0.026107	396	2.01	0.0260217	396	2.01	0.0260328	706	1.79	0.0652764	706	1.79	0.0647449	706	1.79	0.0648093
KV401_HUMAN	Ig kappa chain V-IV region Len OS=Homo sapiens PE=1 SV=2	12746	7.92	-0.143	Immunoglobulins	415	2.28	0.079116	540	4.28	0.116324	460	2.28	0.0264983	402	2.28	0.0348337	402	2.28	0.03472	402	2.28	0.0347348	657	1.59	0.0629407	657	1.59	0.0624283	657	1.59	0.0624903
KVD12_HUMAN	Ig kappa chain V-I region Wes OS=Homo sapiens PE=1 SV=1	11715	6.92	0.007	Immunoglobulins	301	1.79	0.0570888	397	1.79	0.0447143	292	1.79	0.0191208	481	1.79	0.0251354	481	1.79	0.0250533	481	1.79	0.025064	397	1.79	0.0651263	397	1.79	0.064596	397	1.79	0.0646602
KVD28_HUMAN	Ig kappa chain V-II region TEW OS=Homo sapiens PE=1 SV=1	12422	5.69	-0.062	Immunoglobulins	577	1.65	0.0557996	413	1.65	0.0437045	443	2.38	0.0269574	392	1.65	0.0245678	392	1.65	0.0244876	392	1.65	0.024498	317	1.08	0.0416655				317	1.08	0.0413673
KVD33_HUMAN	Ig kappa chain V-I region AG OS=Homo sapiens PE=1 SV=1	12099	5.67	-0.206	Immunoglobulins	142	1.65	0.0554852	734	2.49	0.0642391	127	1.09	0.0122765	214	1.67	0.0247255	214	1.67	0.0246447	214	1.67	0.0246552	190	0.63	0.0241679	190	0.63	0.0239711	190	0.63	0.0239949
LBP_HUMAN	Lipopolysaccharide-binding protein OS=Homo sapiens GN=LBP PE=1 SV=3	53521	6.23	0.062	Acute phase	1014	0.71	0.103452	842	0.82	0.0935813	672	0.61	0.029769	712	0.61	0.0391332	712	0.61	0.0390054	712	0.61	0.039022	545	0.2	0.0332441	545	0.2	0.0329735	545	0.2	0.0330062
LDHB_HUMAN	L-lactate dehydrogenase B chain OS=Homo sapiens GN=LDHB PE=1 SV=2	36900	5.71	0.056	Other plasma components													62	0.09	0.0039677	62	0.09	0.00396939
LG3BP_HUMAN	Galectin-3-binding protein OS=Homo sapiens GN=LGALS3BP PE=1 SV=1	66202	5.13	-0.135	Complement system				24	0.05	0.00705817	96	0.1	0.00603644	53	0.05	0.00396764	53	0.05	0.00395468	53	0.05	0.00395637
LIMS1_HUMAN	LIM and senescent cell antigen-like-containing domain protein 1 OS=Homo sapiens GN=LIMS1 PE=1 SV=4	39108	8.43	-0.343	Coagulation	86	0.08	0.00851748	43	0.08	0.00667124	64	0.08	0.00285276	163	0.08	0.00375013	163	0.08	0.00373789	163	0.08	0.00373948
LIPL_HUMAN	Lipoprotein lipase OS=Homo sapiens GN=LPL PE=1 SV=1	53699	8.37	-0.321	Acute phase	449	0.43	0.0628623	412	0.52	0.0595416	304	0.43	0.0210545	329	0.35	0.0225281	329	0.35	0.0224546	329	0.35	0.0224641	168	0.06	0.0100064	168	0.06	0.00992494
LITD1_HUMAN	LINE-1 type transposase domain-containing protein 1 OS=Homo sapiens GN=L1TD1 PE=1 SV=1	99245	4.87	-0.857	Other plasma components	40	0.03	0.00810561	42	0.03	0.00634864	42	0.03	0.00271481	50	0.03	0.00356879	50	0.03	0.00355713	50	0.03	0.00355865	39	0.03	0.00924678	39	0.03	0.0091715	39	0.03	0.00918062
LRC8B_HUMAN	Volume-regulated anion channel subunit LRRC8B OS=Homo sapiens GN=LRRC8B PE=1 SV=2	93528	6.4	0.043	Tissue leakage	25	0.04	0.0101849	28	0.04	0.00797724				31	0.04	0.00448428	31	0.04	0.00446963	31	0.04	0.00447154
LTBP1_HUMAN	Latent-transforming growth factor beta-binding protein 1 OS=Homo sapiens GN=LTBP1 PE=1 SV=4	195112	5.63	-0.493	Tissue leakage	487	0.24	0.127483	556	0.26	0.10817	804	0.35	0.0622676	433	0.09	0.0210483	433	0.09	0.0209796	433	0.09	0.0209885	249	0.02	0.0121192	249	0.02	0.0120206	249	0.02	0.0120325
LUM_HUMAN	Lumican OS=Homo sapiens GN=LUM PE=1 SV=2	38747	6.16	-0.276	Tissue leakage	45	0.09	0.00949372	71	0.18	0.0148717	46	0.09	0.00317973													52	0.09	0.0107421	52	0.09	0.0107528
LV147_HUMAN	Ig lambda chain V-I region WAH OS=Homo sapiens PE=1 SV=1	11832	6.29	-0.213	Immunoglobulins	317	1.14	0.0367214	439	1.14	0.0287617	295	1.14	0.0122991	492	1.76	0.024961	492	1.76	0.0248795	492	1.76	0.0248901	517	1.76	0.0646743	517	1.76	0.0641477	517	1.76	0.0642115
LV151_HUMAN	Ig lambda chain V-I region NEW OS=Homo sapiens PE=1 SV=1	11560	7.98	-0.174	Immunoglobulins				82	0.25	0.00734795	84	0.25	0.00314214	34	0.3	0.00415691	34	0.3	0.00414333	66	0.3	0.00414545	114	0.69	0.0247745	39	0.3	0.0106829	39	0.3	0.0106935
LV301_HUMAN	Ig lambda chain V-III region SH OS=Homo sapiens PE=1 SV=1	11500	6.02	-0.263	Immunoglobulins	73	0.3	0.00929354	83	0.3	0.00727908	52	0.3	0.00311269	72	0.3	0.00409182	72	0.3	0.00407846	72	0.3	0.00408019	103	0.3	0.0107147	103	0.3	0.0106275	103	0.3	0.010638
LV321_HUMAN	Ig lambda chain V-III region LOI OS=Homo sapiens PE=1 SV=1	12042	4.95	-0.275	Immunoglobulins	146	0.29	0.00950719	143	0.29	0.00744642	141	0.29	0.00318425	149	0.29	0.00418589	149	0.29	0.00417222	149	0.29	0.004174	249	0.29	0.0108457	249	0.29	0.0107574	249	0.29	0.0107681
LV403_HUMAN	Ig lambda chain V-IV region Hil OS=Homo sapiens PE=1 SV=1	11624	6.04	-0.268	Immunoglobulins	76	0.68	0.0215189	80	0.3	0.0074358	150	0.68	0.00720733	120	0.3	0.00417992	120	0.3	0.00416627	120	0.3	0.00416804	85	0.3	0.0108302	85	0.3	0.0107421	85	0.3	0.0107527
LYSC_HUMAN	Lysozyme C OS=Homo sapiens GN=LYZ PE=1 SV=1	16982	9.38	-0.195	Other plasma components	564	1.48	0.0684237	423	1.07	0.0387457	400	1.97	0.0305046	502	1.48	0.030126	502	1.48	0.0300276	502	1.48	0.0300404	253	1.07	0.056433	253	1.07	0.0559736	253	1.07	0.0560292
MA1A1_HUMAN	Mannosyl-oligosaccharide 1,2-alpha-mannosidase IA OS=Homo sapiens GN=MAN1A1 PE=1 SV=3	73150	6.04	-0.265	Other plasma components	47	0.04	0.00796581				48	0.04	0.00266799
MAON_HUMAN	NADP-dependent malic enzyme, mitochondrial OS=Homo sapiens GN=ME3 PE=2 SV=2	67653	8.16	-0.12	Tissue leakage																			31	0.05	0.0105055				31	0.05	0.0104304
MASP1_HUMAN	Mannan-binding lectin serine protease 1 OS=Homo sapiens GN=MASP1 PE=1 SV=3	80849	5.29	-0.415	Complement system	581	0.43	0.0946453	712	0.49	0.0844737	793	0.55	0.0405459	440	0.13	0.0125982	440	0.13	0.0125571	440	0.13	0.0125624
MASP2_HUMAN	Mannan-binding lectin serine protease 2 OS=Homo sapiens GN=MASP2 PE=1 SV=4	77193	5.39	-0.283	Complement system	751	0.4	0.0840608	681	0.4	0.0658399	470	0.4	0.0281545	659	0.28	0.0259076	659	0.28	0.025823	659	0.28	0.025834	111	0.09	0.0215765	111	0.09	0.0214008	111	0.09	0.0214221
MFGM_HUMAN	Lactadherin OS=Homo sapiens GN=MFGE8 PE=1 SV=2	43894	8.47	-0.249	Complement system	77	0.16	0.0191197	89	0.08	0.00748766	117	0.16	0.00640376	104	0.16	0.00841814	104	0.16	0.00839065	104	0.16	0.00839422
MMRN1_HUMAN	Multimerin-1 OS=Homo sapiens GN=MMRN1 PE=1 SV=3	139221	8.15	-0.447	Coagulation	3548	1.31	0.496514	3931	1.65	0.489824	4067	2.05	0.260237	2771	1.25	0.208596	2771	1.25	0.207915	2771	1.25	0.208003	1641	0.67	0.289695	1641	0.67	0.287336	1641	0.67	0.287622
MOES_HUMAN	Moesin OS=Homo sapiens GN=MSN PE=1 SV=3	67892	6.08	-0.975	Tissue leakage	156	0.21	0.0388145	156	0.21	0.0304011	304	0.53	0.0328099	248	0.27	0.0219722	248	0.27	0.0219004	248	0.27	0.0219098
MTMR2_HUMAN	Myotubularin-related protein 2 OS=Homo sapiens GN=MTMR2 PE=1 SV=4	73905	7.02	-0.445	Lipoproteins																			31	0.05	0.0114764	31	0.05	0.0113829	31	0.05	0.0113942
MUC19_HUMAN	Mucin-19 OS=Homo sapiens GN=MUC19 PE=1 SV=3	812409	4.97	-0.154	Acute phase
MUCB_HUMAN	Ig mu heavy chain disease protein OS=Homo sapiens PE=1 SV=1	43543	5.13	-0.407	Immunoglobulins	7779	6.76	0.801347	8603	11.95	1.10953	16572	17.67	0.70156	9249	19.09	0.996358	9249	19.09	0.993104	9249	19.09	0.993527	5933	8.66	1.17111	5933	8.66	1.16157	5933	8.66	1.16273
MYH14_HUMAN	Myosin-14 OS=Homo sapiens GN=MYH14 PE=1 SV=2	228701	5.52	-0.811	Tissue leakage										171	0.03	0.00822395	171	0.03	0.00819709	171	0.03	0.00820058				372	0.04	0.0281798	372	0.04	0.0282078
MYH15_HUMAN	Myosin-15 OS=Homo sapiens GN=MYH15 PE=1 SV=5	225904	5.67	-0.66	Tissue leakage	31	0.02	0.0123001	31	0.02	0.00963396
MYH9_HUMAN	Myosin-9 OS=Homo sapiens GN=MYH9 PE=1 SV=4	227646	5.5	-0.854	Tissue leakage	632	0.17	0.105357	593	0.22	0.106791	974	0.35	0.0726504	2948	0.35	0.0955035	2948	0.35	0.0951916	2948	0.35	0.0952321	4030	0.04	0.0282801	4030	0.04	0.0280498	4030	0.04	0.0280777
MYL6_HUMAN	Myosin light polypeptide 6 OS=Homo sapiens GN=MYL6 PE=1 SV=2	17090	4.56	-0.389	Tissue leakage													57	0.2	0.00408359	57	0.2	0.00408533
NID1_HUMAN	Nidogen-1 OS=Homo sapiens GN=NID1 PE=1 SV=3	139142	5.12	-0.378	Complement system	90	0.1	0.0378804	113	0.15	0.0445041	418	0.32	0.0405993				135	0.02	0.00332475	135	0.02	0.00332616	69	0.05	0.0216067	69	0.05	0.0214308	69	0.05	0.0214521
NU153_HUMAN	Nuclear pore complex protein Nup153 OS=Homo sapiens GN=NUP153 PE=1 SV=2	155440	8.97	-0.469	Tissue leakage																			41	0.02	0.00965503				41	0.02	0.00958594
OIT3_HUMAN	Oncoprotein-induced transcript 3 protein OS=Homo sapiens GN=OIT3 PE=1 SV=2	62206	5.34	-0.234	Tissue leakage	207	0.17	0.0287897	137	0.23	0.0305078	151	0.17	0.00964253	92	0.11	0.00820193	92	0.11	0.00817514	92	0.11	0.00817863
OTU6A_HUMAN	OTU domain-containing protein 6A OS=Homo sapiens GN=OTUD6A PE=1 SV=1	33450	6.29	-0.662	Other plasma components				24	0.1	0.00713259	26	0.1	0.00305004				22	0.1	0.00399638	22	0.1	0.00399808
PAI1_HUMAN	Plasminogen activator inhibitor 1 OS=Homo sapiens GN=SERPINE1 PE=1 SV=1	45088	6.68	-0.059	Coagulation				120	0.24	0.023074	148	0.24	0.00986693	139	0.07	0.00378312	139	0.07	0.00377076	139	0.07	0.00377237
PARVB_HUMAN	Beta-parvin OS=Homo sapiens GN=PARVB PE=1 SV=1	41745	6.26	-0.31	Tissue leakage													62	0.08	0.00398993	62	0.08	0.00399163
PCCB_HUMAN	Propionyl-CoA carboxylase beta chain, mitochondrial OS=Homo sapiens GN=PCCB PE=1 SV=3	58806	7.56	0.012	Tissue leakage																			36	0.06	0.0109581	36	0.06	0.0108688	36	0.06	0.0108796
PCOC1_HUMAN	Procollagen C-endopeptidase enhancer 1 OS=Homo sapiens GN=PCOLCE PE=1 SV=2	48797	7.41	-0.286	Tissue leakage	54	0.07	0.00929923	48	0.14	0.0145671	102	0.39	0.0173527	59	0.14	0.00818865	59	0.14	0.0081619	59	0.14	0.00816538
PCOC2_HUMAN	Procollagen C-endopeptidase enhancer 2 OS=Homo sapiens GN=PCOLCE2 PE=1 SV=1	46542	8.81	-0.206	Tissue leakage	43	0.07	0.00886949	46	0.07	0.00694695
PDGFB_HUMAN	Platelet-derived growth factor subunit B OS=Homo sapiens GN=PDGFB PE=1 SV=1	27893	9.39	-0.543	Coagulation	42	0.12	0.00911239	27	0.12	0.00713719	30	0.12	0.00305201
PECA1_HUMAN	Platelet endothelial cell adhesion molecule OS=Homo sapiens GN=PECAM1 PE=1 SV=1	83396	6.55	-0.328	Coagulation	43	0.04	0.00908157	33	0.04	0.00711305	32	0.04	0.00304169	102	0.04	0.00399849	102	0.04	0.00398543	102	0.04	0.00398713
PEDF_HUMAN	Pigment epithelium-derived factor OS=Homo sapiens GN=SERPINF1 PE=1 SV=4	46454	5.97	-0.164	Acute phase	354	0.73	0.0923213	806	1.44	0.142638	301	0.73	0.0309212	226	0.41	0.0228296	226	0.41	0.022755	226	0.41	0.0227647	447	0.73	0.105319	447	0.73	0.104462	447	0.73	0.104565
PF4V_HUMAN	Platelet factor 4 variant OS=Homo sapiens GN=PF4V1 PE=1 SV=1	11773	9.3	0.099	Coagulation	760	1.79	0.0573715	1050	3.66	0.0918796	1127	6.78	0.0727825	784	1.79	0.0252599	784	1.79	0.0251774	784	1.79	0.0251881
PGRP2_HUMAN	N-acetylmuramoyl-L-alanine amidase OS=Homo sapiens GN=PGLYRP2 PE=1 SV=1	62748	7.25	-0.129	Tissue leakage	868	0.94	0.160577	1066	0.94	0.12577	983	1.26	0.0720909	295	0.58	0.0436234	295	0.58	0.0434809	295	0.58	0.0434994	260	0.29	0.0565143	260	0.29	0.0560542	260	0.29	0.0561099
PHLD_HUMAN	Phosphatidylinositol-glycan-specific phospholipase D OS=Homo sapiens GN=GPLD1 PE=1 SV=3	92905	5.91	-0.13	Tissue leakage	205	0.19	0.0480561	281	0.27	0.0534877	132	0.19	0.0160954
PHLP1_HUMAN	PH domain leucine-rich repeat-containing protein phosphatase 1 OS=Homo sapiens GN=PHLPP1 PE=1 SV=3	186951	5.88	-0.307	Tissue leakage																			25	0.02	0.0116123				25	0.02	0.0115292
PIGR_HUMAN	Polymeric immunoglobulin receptor OS=Homo sapiens GN=PIGR PE=1 SV=4	84429	5.58	-0.341	Immunoglobulins	97	0.08	0.0183881	119	0.08	0.0144023	26	0.04	0.00307937	268	0.31	0.0313722	268	0.31	0.0312697							35	0.04	0.0104031	35	0.04	0.0104134
PKHL1_HUMAN	Fibrocystin-L OS=Homo sapiens GN=PKHD1L1 PE=2 SV=2	470286	5.71	-0.101	Immunoglobulins				28	0.01	0.010028	32	0.01	0.00428817	32	0.01	0.00563707	32	0.01	0.00561866	32	0.01	0.00562105	37	0.01	0.0146057	37	0.01	0.0144868	37	0.01	0.0145012
PKN2_HUMAN	Serine/threonine-protein kinase N2 OS=Homo sapiens GN=PKN2 PE=1 SV=1	112820	5.95	-0.503	Tissue leakage	27	0.03	0.00921432				27	0.03	0.00308615
PLCA_HUMAN	1-acyl-sn-glycerol-3-phosphate acyltransferase alpha OS=Homo sapiens GN=AGPAT1 PE=1 SV=2	32038	9.48	0.265	Tissue leakage				38	0.1	0.0068315	34	0.1	0.00292129	29	0.1	0.00384022	29	0.1	0.00382768	29	0.1	0.00382931	48	0.1	0.00995007	48	0.1	0.00986906
PLEK_HUMAN	Pleckstrin OS=Homo sapiens GN=PLEK PE=1 SV=3	40499	8.51	-0.553	Coagulation										244	0.27	0.0131069	244	0.27	0.0130641	244	0.27	0.0130696
PLF4_HUMAN	Platelet factor 4 OS=Homo sapiens GN=PF4 PE=1 SV=2	11123	8.93	0.351	Coagulation	979	2.87	0.086908	1372	7.71	0.182864	1795	13.97	0.141686	1206	7.71	0.102794	1206	7.71	0.102458	1206	7.71	0.102502	561	5.65	0.195178	561	5.65	0.193589	561	5.65	0.193781
PLMN_HUMAN	Plasminogen OS=Homo sapiens GN=PLG PE=1 SV=2	93247	7.04	-0.688	Coagulation	2522	1.82	0.462021	2828	3.12	0.620355	1683	2.02	0.17175	3216	3.73	0.416903	3216	3.73	0.415541	3216	3.73	0.415718	2948	2.12	0.613948	2948	2.12	0.608949	2948	2.12	0.609555
PLSL_HUMAN	Plastin-2 OS=Homo sapiens GN=LCP1 PE=1 SV=6	70814	5.29	-0.312	Tissue leakage				60	0.05	0.00754988	54	0.05	0.00322849
PLTP_HUMAN	Phospholipid transfer protein OS=Homo sapiens GN=PLTP PE=1 SV=1	54933	6.53	0.089	Lipoproteins	121	0.06	0.00897306	54	0.06	0.00702806	69	0.12	0.00601069
PON1_HUMAN	Serum paraoxonase/arylesterase 1 OS=Homo sapiens GN=PON1 PE=1 SV=3	39877	5.08	-0.091	Lipoproteins	1843	2.31	0.250778	2195	2.88	0.244887	2509	7.61	0.276705	988	1.4	0.0669178	988	1.4	0.0666992	988	1.4	0.0667277	306	0.75	0.0928848	306	0.75	0.0921285	306	0.75	0.0922201
PON3_HUMAN	Serum paraoxonase/lactonase 3 OS=Homo sapiens GN=PON3 PE=1 SV=3	39810	5.24	-0.021	Other plasma components	43	0.08	0.00867038				42	0.08	0.00290397
PPIA_HUMAN	Peptidyl-prolyl cis-trans isomerase A OS=Homo sapiens GN=PPIA PE=1 SV=2	18229	7.68	-0.316	Tissue leakage				34	0.19	0.00738529	65	0.41	0.00681486	134	0.41	0.00895855	134	0.41	0.00892929	134	0.41	0.0089331	32	0.19	0.0107567	32	0.19	0.0106691
PRDX1_HUMAN	Peroxiredoxin-1 OS=Homo sapiens GN=PRDX1 PE=1 SV=1	22324	8.27	-0.265	Tissue leakage																			43	0.15	0.0103998	43	0.15	0.0103151
PRG4_HUMAN	Proteoglycan 4 OS=Homo sapiens GN=PRG4 PE=1 SV=2	152238	9.53	-1.028	Tissue leakage	816	0.29	0.120192	865	0.35	0.113617	946	0.26	0.0360916	917	0.37	0.0675174	917	0.37	0.0672969	917	0.37	0.0673256	893	0.16	0.0756491	893	0.16	0.0750332	893	0.16	0.0751078
PROC_HUMAN	Vitamin K-dependent protein C OS=Homo sapiens GN=PROC PE=1 SV=1	53406	5.85	-0.349	Coagulation	42	0.06	0.00872363	72	0.13	0.0148042	43	0.06	0.00292181	42	0.13	0.00832194	42	0.13	0.00829476	42	0.13	0.00829829
PROF1_HUMAN	Profilin-1 OS=Homo sapiens GN=PFN1 PE=1 SV=2	15216	8.44	-0.116	Tissue leakage	106	0.5	0.0207122	152	0.83	0.0269296	124	0.5	0.00693714	212	0.83	0.015138	212	0.83	0.0150886	212	0.83	0.015095
PROS_HUMAN	Vitamin K-dependent protein S OS=Homo sapiens GN=PROS1 PE=1 SV=1	77127	5.48	-0.295	Coagulation	568	0.65	0.136482	719	0.72	0.11841	878	0.95	0.0668098	362	0.45	0.0416016	362	0.45	0.0414657	362	0.45	0.0414834	214	0.18	0.0431161	214	0.18	0.0427651	214	0.18	0.0428076
PRR11_HUMAN	Proline-rich protein 11 OS=Homo sapiens GN=PRR11 PE=1 SV=1	40573	10.14	-0.469	Tissue leakage	33	0.08	0.00883655	29	0.08	0.00692115				47	0.08	0.00389062	47	0.08	0.00387791				32	0.08	0.0100806	32	0.08	0.00999856	32	0.08	0.0100085
PTN6_HUMAN	Tyrosine-protein phosphatase non-receptor type 6 OS=Homo sapiens GN=PTPN6 PE=1 SV=1	67918	7.65	-0.687	Other plasma components	30	0.05	0.00924508	28	0.05	0.00724112	29	0.05	0.00309646										29	0.05	0.0105467				29	0.05	0.0104712
PTPRC_HUMAN	Receptor-type tyrosine-protein phosphatase C OS=Homo sapiens GN=PTPRC PE=1 SV=2	148644	5.77	-0.595	Coagulation	66	0.02	0.00809344				85	0.04	0.00542147
QSOX1_HUMAN	Sulfhydryl oxidase 1 OS=Homo sapiens GN=QSOX1 PE=1 SV=3	83324	9.13	-0.191	Tissue leakage				32	0.04	0.00710691	34	0.04	0.00303907
RAB10_HUMAN	Ras-related protein Rab-10 OS=Homo sapiens GN=RAB10 PE=1 SV=1	22755	8.59	-0.33	Lipoproteins													101	0.51	0.0138649	101	0.51	0.0138708
RAB15_HUMAN	Ras-related protein Rab-15 OS=Homo sapiens GN=RAB15 PE=1 SV=1	24660	5.53	-0.559	Lipoproteins	64	0.29	0.0194691	39	0.14	0.0073616				84	0.29	0.008572	84	0.29	0.008544
RAB35_HUMAN	Ras-related protein Rab-35 OS=Homo sapiens GN=RAB35 PE=1 SV=1	23296	8.52	-0.473	Lipoproteins										84	0.31	0.00865634	84	0.31	0.00862807	84	0.31	0.00863174
RAC2_HUMAN	Ras-related C3 botulinum toxin substrate 2 OS=Homo sapiens GN=RAC2 PE=1 SV=1	21814	7.52	-0.121	Lipoproteins				49	0.15	0.00697714	31	0.15	0.00298357	40	0.15	0.00392209	40	0.15	0.00390928	40	0.15	0.00391095
RAD_HUMAN	GTP-binding protein RAD OS=Homo sapiens GN=RRAD PE=1 SV=2	33453	9.06	-0.496	Tissue leakage	16	0.1	0.00910733	16	0.1	0.00713323	18	0.1	0.00305032	20	0.1	0.00400983	20	0.1	0.00399674	20	0.1	0.00399844
RAP1B_HUMAN	Ras-related protein Rap-1b OS=Homo sapiens GN=RAP1B PE=1 SV=1	21040	5.65	-0.39	Lipoproteins	403	1.43	0.0819101	402	1.43	0.0641553	391	2.26	0.0433575	529	1.43	0.0360639	529	1.43	0.0359461	529	1.43	0.0359615
RASF6_HUMAN	Ras association domain-containing protein 6 OS=Homo sapiens GN=RASSF6 PE=1 SV=1	43413	8.79	-0.649	Tissue leakage										27	0.08	0.00416295	27	0.08	0.00414935	27	0.08	0.00415112
RB11A_HUMAN	Ras-related protein Rab-11A OS=Homo sapiens GN=RAB11A PE=1 SV=3	24492	6.12	-0.421	Lipoproteins													67	0.14	0.00409659	67	0.14	0.00409834
RB27B_HUMAN	Ras-related protein Rab-27B OS=Homo sapiens GN=RAB27B PE=1 SV=4	24820	5.35	-0.487	Lipoproteins													60	0.29	0.00859944	60	0.29	0.0086031
RB33B_HUMAN	Ras-related protein Rab-33B OS=Homo sapiens GN=RAB33B PE=1 SV=1	26043	6.71	-0.262	Lipoproteins	35	0.13	0.00921701	39	0.13	0.00721914				62	0.13	0.00405813	62	0.13	0.00404487
RELN_HUMAN	Reelin OS=Homo sapiens GN=RELN PE=1 SV=3	394980	5.54	-0.282	Coagulation	102	0.04	0.0430121	114	0.02	0.0168444	204	0.08	0.0288121	198	0.02	0.00946883	198	0.02	0.0094379	198	0.02	0.00944192	76	0.03	0.0368008	76	0.03	0.0365012	76	0.03	0.0365375
RET4_HUMAN	Retinol-binding protein 4 OS=Homo sapiens GN=RBP4 PE=1 SV=3	23337	5.76	-0.433	Coagulation	62	0.14	0.00889465	61	0.31	0.0154262	56	0.31	0.00659655	376	1.93	0.0539875	376	1.93	0.0538112	376	1.93	0.0538341	107	0.5	0.036239	107	0.5	0.0359439	107	0.5	0.0359796
RETN_HUMAN	Resistin OS=Homo sapiens GN=RETN PE=1 SV=1	12096	6.51	0.381	Coagulation	101	0.28	0.00922052	180	0.65	0.0167651	126	1.12	0.0123529	128	0.65	0.00942424	128	0.65	0.00939346				49	0.28	0.0105187	49	0.28	0.010433
RHDF2_HUMAN	Inactive rhomboid protein 2 OS=Homo sapiens GN=RHBDF2 PE=1 SV=2	98164	9.1	-0.257	Tissue leakage																			40	0.03	0.00914607	40	0.03	0.0090716
RHOA_HUMAN	Transforming protein RhoA OS=Homo sapiens GN=RHOA PE=1 SV=1	22096	5.83	-0.368	Lipoproteins				38	0.15	0.00706734	71	0.33	0.00664871				54	0.33	0.0087116	54	0.33	0.00871531
RNAS4_HUMAN	Ribonuclease 4 OS=Homo sapiens GN=RNASE4 PE=1 SV=3	17286	9.3	-0.372	Coagulation	155	0.71	0.0334125	168	1.04	0.0383335	62	0.71	0.0111908	52	0.2	0.00414396	52	0.2	0.00413043	52	0.2	0.00413219	85	0.2	0.0107371	85	0.2	0.0106496	85	0.2	0.0106602
ROCK2_HUMAN	Rho-associated protein kinase 2 OS=Homo sapiens GN=ROCK2 PE=1 SV=4	161939	5.75	-0.843	Other plasma components																						30	0.02	0.00997682	30	0.02	0.00998673
RS12_HUMAN	40S ribosomal protein S12 OS=Homo sapiens GN=RPS12 PE=1 SV=3	14905	6.81	-0.187	Tissue leakage	111	0.23	0.00933288	92	0.23	0.00730989	63	0.23	0.00312586	58	0.23	0.00410914				58	0.23	0.00409746
RS27A_HUMAN	Ubiquitin-40S ribosomal protein S27a OS=Homo sapiens GN=RPS27A PE=1 SV=2	18296	9.68	-0.844	Tissue leakage				51	0.18	0.0070223	35	0.18	0.00300288	33	0.18	0.00394748				33	0.18	0.00393626
RSU1_HUMAN	Ras suppressor protein 1 OS=Homo sapiens GN=RSU1 PE=1 SV=3	31521	8.57	-0.457	Tissue leakage	68	0.11	0.00943949	77	0.22	0.0147868	127	0.22	0.00632314	90	0.11	0.00415608	90	0.11	0.00414251	90	0.11	0.00414427
S10A8_HUMAN	Protein S100-A8 OS=Homo sapiens GN=S100A8 PE=1 SV=1	10885	6.51	-0.397	Tissue leakage	87	0.32	0.00948275	71	0.32	0.00742727	43	0.32	0.00317606	105	0.74	0.00965498	105	0.74	0.00962344	105	0.74	0.00962755
S10A9_HUMAN	Protein S100-A9 OS=Homo sapiens GN=S100A9 PE=1 SV=1	13291	5.71	-0.87	Tissue leakage	81	0.26	0.00940777	65	0.26	0.00736855	124	0.58	0.00702903	193	0.26	0.00414212	193	0.26	0.00412859	193	0.26	0.00413035	135	0.58	0.0239412	135	0.58	0.0237463	135	0.58	0.0237699
SAA4_HUMAN	Serum amyloid A-4 protein OS=Homo sapiens GN=SAA4 PE=1 SV=2	14851	9.17	-0.519	Acute phase	187	0.51	0.0206197	181	0.51	0.0161502	174	0.51	0.00690615				49	0.23	0.00408088	49	0.23	0.00408262	127	0.51	0.0235227	127	0.51	0.0233312	127	0.51	0.0233543
SAMP_HUMAN	Serum amyloid P-component OS=Homo sapiens GN=APCS PE=1 SV=2	25485	6.1	-0.078	Acute phase	76	0.13	0.00901953	148	0.45	0.0244539	90	0.28	0.00650658	115	0.28	0.0085533	115	0.28	0.00852537	115	0.28	0.008529	167	0.28	0.0221617	167	0.28	0.0219813	167	0.28	0.0220031
SDF1_HUMAN	Stromal cell-derived factor 1 OS=Homo sapiens GN=CXCL12 PE=1 SV=1	10944	9.93	0.082	Tissue leakage	111	0.31	0.0092362	151	0.31	0.00723417				74	0.31	0.00406658	74	0.31	0.00405329
SEPP1_HUMAN	Selenoprotein P OS=Homo sapiens GN=SEPP1 PE=1 SV=3	44126	8.08	-0.626	Tissue leakage	123	0.16	0.0192207	137	0.24	0.0225817	122	0.24	0.00965641	113	0.16	0.00846264	113	0.16	0.008435	113	0.16	0.00843859
SFRP3_HUMAN	Secreted frizzled-related protein 3 OS=Homo sapiens GN=FRZB PE=1 SV=2	37257	8.81	-0.303	Tissue leakage				31	0.09	0.00714992	36	0.09	0.00305746
SHBG_HUMAN	Sex hormone-binding globulin OS=Homo sapiens GN=SHBG PE=1 SV=2	43980	6.22	-0.167	Lipoproteins	112	0.16	0.0191572	157	0.34	0.0318849	207	0.34	0.0136347
SIA8D_HUMAN	CMP-N-acetylneuraminate-poly-alpha-2,8-sialyltransferase OS=Homo sapiens GN=ST8SIA4 PE=1 SV=1	41611	9.77	-0.256	Tissue leakage				63	0.08	0.00709821	47	0.08	0.00303535
SIK1_HUMAN	Serine/threonine-protein kinase SIK1 OS=Homo sapiens GN=SIK1 PE=1 SV=2	85932	6.81	-0.201	Coagulation													20	0.04	0.00410663	20	0.04	0.00410838
SLIT1_HUMAN	Slit homolog 1 protein OS=Homo sapiens GN=SLIT1 PE=2 SV=4	173861	6.14	-0.283	Tissue leakage													32	0.04	0.00830869	32	0.04	0.00831223	28	0.02	0.0107992	28	0.02	0.0107113
SMYD4_HUMAN	SET and MYND domain-containing protein 4 OS=Homo sapiens GN=SMYD4 PE=2 SV=3	91164	6.39	-0.248	Other plasma components																			37	0.04	0.0113252	37	0.04	0.011233
SPB3_HUMAN	Serpin B3 OS=Homo sapiens GN=SERPINB3 PE=1 SV=2	44594	6.35	-0.461	Coagulation																			76	0.07	0.00969472	76	0.07	0.00961579
SPP24_HUMAN	Secreted phosphoprotein 24 OS=Homo sapiens GN=SPP2 PE=1 SV=1	24607	8.59	-0.401	Tissue leakage													30	0.14	0.00411583	30	0.14	0.00411758
SPTB1_HUMAN	Spectrin beta chain, erythrocytic OS=Homo sapiens GN=SPTB PE=1 SV=5	247171	5.15	-0.67	Tissue leakage													75	0.04	0.0118121	75	0.04	0.0118172
ST1C2_HUMAN	Sulfotransferase 1C2 OS=Homo sapiens GN=SULT1C2 PE=1 SV=1	35142	7.12	-0.591	Tissue leakage										34	0.1	0.00421228	34	0.1	0.00419853
STOM_HUMAN	Erythrocyte band 7 integral membrane protein OS=Homo sapiens GN=STOM PE=1 SV=3	31882	7.71	0.043	Tissue leakage	291	0.81	0.070305	334	0.81	0.0550657	332	0.81	0.0235473	421	0.64	0.0244578	421	0.64	0.0243779	421	0.64	0.0243883
SVEP1_HUMAN	Sushi, von Willebrand factor type A, EGF and pentraxin domain-containing protein 1 OS=Homo sapiens GN=SVEP1 PE=1 SV=3	404681	5.32	-0.321	Coagulation	88	0.02	0.0220343	89	0.03	0.0258872	135	0.03	0.0110699	88	0.02	0.00970139	88	0.02	0.0096697	88	0.02	0.00967383				66	0.01	0.0124659	66	0.01	0.0124783
T11L2_HUMAN	T-complex protein 11-like protein 2 OS=Homo sapiens GN=TCP11L2 PE=2 SV=1	58511	4.89	-0.258	Other plasma components	26	0.06	0.00955751				34	0.06	0.0032011
TBA1B_HUMAN	Tubulin alpha-1B chain OS=Homo sapiens GN=TUBA1B PE=1 SV=1	50804	4.94	-0.23	Tissue leakage	75	0.29	0.0401099	191	0.37	0.0400821	331	0.55	0.0254783	584	0.65	0.0395824				584	0.65	0.03947	249	0.29	0.0457569				249	0.29	0.0454295
TBA4A_HUMAN	Tubulin alpha-4A chain OS=Homo sapiens GN=TUBA4A PE=1 SV=1	50634	4.95	-0.252	Tissue leakage				201	0.29	0.0313106	302	0.37	0.0170826	549	0.66	0.0400569	549	0.66	0.0399261	549	0.66	0.0399431
TBB1_HUMAN	Tubulin beta-1 chain OS=Homo sapiens GN=TUBB1 PE=1 SV=1	50865	5.05	-0.243	Tissue leakage	190	0.21	0.02908	207	0.29	0.0314534	221	0.65	0.0301469	711	0.76	0.0463366	711	0.76	0.0461852	711	0.76	0.0462049				354	0.55	0.0861772	354	0.55	0.0862628
TBB4A_HUMAN	Tubulin beta-4A chain OS=Homo sapiens GN=TUBB4A PE=1 SV=2	50010	4.78	-0.321	Tissue leakage																			155	0.14	0.0217443				155	0.14	0.0215887
TBB5_HUMAN	Tubulin beta chain OS=Homo sapiens GN=TUBB PE=1 SV=2	50095	4.78	-0.348	Tissue leakage										403	0.47	0.0282217	403	0.47	0.0281295	403	0.47	0.0281415
TENX_HUMAN	Tenascin-X OS=Homo sapiens GN=TNXB PE=1 SV=4	464946	5.05	-0.514	Tissue leakage																			319	0.06	0.0866392	319	0.06	0.0859338	319	0.06	0.0860193
TETN_HUMAN	Tetranectin OS=Homo sapiens GN=CLEC3B PE=1 SV=3	22921	5.52	-0.299	Other plasma components	220	0.73	0.0455525	173	0.73	0.0356786				102	0.15	0.00412113	102	0.15	0.00410767	102	0.15	0.00410942	139	0.31	0.0220676				139	0.31	0.0219097
TFPI1_HUMAN	Tissue factor pathway inhibitor OS=Homo sapiens GN=TFPI PE=1 SV=1	36075	8.61	-0.599	Coagulation	107	0.3	0.0294634	117	0.3	0.023077	98	0.3	0.00986819	75	0.3	0.0129724	75	0.3	0.01293	75	0.3	0.0129355	64	0.09	0.0100835	64	0.09	0.0100014	64	0.09	0.0100113
TGFB1_HUMAN	Transforming growth factor beta-1 OS=Homo sapiens GN=TGFB1 PE=1 SV=2	44997	8.83	-0.311	Coagulation	51	0.24	0.0294002	129	0.33	0.0316627	168	0.33	0.0135396	112	0.15	0.00809033	112	0.15	0.0080639	112	0.15	0.00806734
THBG_HUMAN	Thyroxine-binding globulin OS=Homo sapiens GN=SERPINA7 PE=1 SV=2	46637	5.87	0.015	Immunoglobulins																			70	0.07	0.0101389	70	0.07	0.0100563
THRB_HUMAN	Prothrombin OS=Homo sapiens GN=F2 PE=1 SV=2	71475	5.64	-0.539	Coagulation	1174	1.45	0.282149	1816	1.69	0.257568	1164	1.45	0.0945001	778	0.88	0.0753925	778	0.88	0.0751462	778	0.88	0.0751783	1118	1.24	0.275256	1118	1.24	0.273015	1118	1.24	0.273286
TIF1A_HUMAN	Transcription intermediary factor 1-alpha OS=Homo sapiens GN=TRIM24 PE=1 SV=3	118696	6.73	-0.605	Tissue leakage	33	0.03	0.00969423	53	0.03	0.00759291	69	0.03	0.00324689				52	0.03	0.0042543	52	0.03	0.00425611	30	0.03	0.0110591	30	0.03	0.010969	30	0.03	0.0109799
TIMP3_HUMAN	Metalloproteinase inhibitor 3 OS=Homo sapiens GN=TIMP3 PE=1 SV=2	24813	9	-0.293	Acute phase	150	0.66	0.044584	125	0.66	0.03492	175	0.46	0.0104075	80	0.46	0.0136813	80	0.46	0.0136366	80	0.46	0.0136425
TITIN_HUMAN	Titin OS=Homo sapiens GN=TTN PE=1 SV=4	3842904	6.02	-0.468	Coagulation
TLN1_HUMAN	Talin-1 OS=Homo sapiens GN=TLN1 PE=1 SV=3	271766	5.77	-0.24	Coagulation	487	0.14	0.103581	677	0.18	0.104308	1003	0.33	0.0817747	3243	0.35	0.114013	3243	0.35	0.113641	3243	0.35	0.113689				1400	0.38	0.318119	1400	0.38	0.318435
TNNI1_HUMAN	Troponin I, slow skeletal muscle OS=Homo sapiens GN=TNNI1 PE=1 SV=3	21850	9.61	-0.791	Tissue leakage	58	0.15	0.00892274	71	0.15	0.00698866	50	0.15	0.0029885
TRFE_HUMAN	Serotransferrin OS=Homo sapiens GN=TF PE=1 SV=3	79294	6.81	-0.336	Acute phase	3715	4.27	0.921773	4327	8.69	1.4693	4514	5.73	0.41429	3518	3.31	0.314601	3518	3.31	0.313573	3518	3.31	0.313707	4648	6.29	1.549	4648	6.29	1.53639	4648	6.29	1.53792
TRFL_HUMAN	Lactotransferrin OS=Homo sapiens GN=LTF PE=1 SV=6	80014	8.5	-0.337	Tissue leakage	233	0.27	0.0588146	181	0.22	0.0375353	98	0.13	0.00948461	113	0.17	0.0163044	113	0.17	0.0162512
TSP1_HUMAN	Thrombospondin-1 OS=Homo sapiens GN=THBS1 PE=1 SV=2	133291	4.71	-0.719	Coagulation	14625	6.46	2.34417	15662	6.46	1.83605	26284	9.73	1.18256	15461	2.61	0.416997	15461	2.61	0.415635	15461	2.61	0.415812	5720	1.97	0.815507	5720	1.97	0.808868	5720	1.97	0.809672
TSP3_HUMAN	Thrombospondin-3 OS=Homo sapiens GN=THBS3 PE=1 SV=1	106872	4.43	-0.508	Coagulation	253	0.13	0.0378236	314	0.16	0.0364615	450	0.24	0.0233876	334	0.16	0.0204963	334	0.16	0.0204293	334	0.16	0.020438	380	0.2	0.0663827	380	0.2	0.0658422	380	0.2	0.0659077
TSP4_HUMAN	Thrombospondin-4 OS=Homo sapiens GN=THBS4 PE=1 SV=2	108482	4.44	-0.535	Coagulation	496	0.27	0.0797402	522	0.39	0.0902138	1299	0.92	0.0910029	575	0.09	0.0117028	575	0.09	0.0116646	575	0.09	0.0116696	1730	0.87	0.293115	1730	0.87	0.290728	1730	0.87	0.291017
TTHY_HUMAN	Transthyretin OS=Homo sapiens GN=TTR PE=1 SV=1	15991	5.52	-0.029	Acute phase	677	2.17	0.0944694	742	3.66	0.124798	639	4.65	0.0678014	1048	4.65	0.0891292	1048	4.65	0.088838	1048	4.65	0.0888759	1010	3.66	0.181768	1010	3.66	0.180288	1010	3.66	0.180467
TYK2_HUMAN	Non-receptor tyrosine-protein kinase TYK2 OS=Homo sapiens GN=TYK2 PE=1 SV=3	135389	6.71	-0.324	Tissue leakage										28	0.02	0.00324567	28	0.02	0.00323507
URP2_HUMAN	Fermitin family homolog 3 OS=Homo sapiens GN=FERMT3 PE=1 SV=1	76475	6.52	-0.384	Tissue leakage	231	0.23	0.0478854	421	0.4	0.0652275	319	0.52	0.0362604	503	0.29	0.0265833	503	0.29	0.0264965	503	0.29	0.0265078				103	0.13	0.0306248	103	0.13	0.0306552
VANG1_HUMAN	Vang-like protein 1 OS=Homo sapiens GN=VANGL1 PE=1 SV=1	60222	8.94	-0.183	Tissue leakage	33	0.05	0.00819749	29	0.05	0.00642061							29	0.05	0.00359746	29	0.05	0.00359899
VATC2_HUMAN	V-type proton ATPase subunit C 2 OS=Homo sapiens GN=ATP6V1C2 PE=1 SV=2	48785	5.82	-0.347	Tissue leakage	30	0.07	0.00929694	30	0.07	0.00728174
VIME_HUMAN	Vimentin OS=Homo sapiens GN=VIM PE=1 SV=4	53676	5.06	-0.823	Tissue leakage	243	0.06	0.00876773	218	0.06	0.00686724	192	0.06	0.00293658	186	0.06	0.00386031	186	0.06	0.0038477	186	0.06	0.00384934
VINC_HUMAN	Vinculin OS=Homo sapiens GN=VCL PE=1 SV=4	124292	5.5	-0.405	Tissue leakage	75	0.03	0.0101513	106	0.08	0.0212024	121	0.03	0.00339996	366	0.08	0.0119186	366	0.08	0.0118796	366	0.08	0.0118847
VIP1_HUMAN	Inositol hexakisphosphate and diphosphoinositol-pentakisphosphate kinase 1 OS=Homo sapiens GN=PPIP5K1 PE=1 SV=1	161245	5.26	-0.473	Tissue leakage													27	0.02	0.00385289	27	0.02	0.00385453
VTDB_HUMAN	Vitamin D-binding protein OS=Homo sapiens GN=GC PE=1 SV=1	54526	5.4	-0.346	Tissue leakage	1469	1.41	0.209304	1325	1.56	0.181376	1461	1.14	0.0566785	218	0.26	0.0169929	218	0.26	0.0169374	218	0.26	0.0169446	610	0.8	0.135474	610	0.8	0.134371	610	0.8
VTNC_HUMAN	Vitronectin OS=Homo sapiens GN=VTN PE=1 SV=1	55069	5.55	-0.723	Tissue leakage	2201	1.53	0.229379	2153	1.68	0.197273	2101	2.39	0.120009	1253	0.89	0.0587474	1253	0.89	0.0585555	1253	0.89	0.0585804	1322	0.79	0.135112	1322	0.79	0.134012	1322	0.79	0.134146
VWF_HUMAN	von Willebrand factor OS=Homo sapiens GN=VWF PE=1 SV=4	322401	5.29	-0.208	Coagulation	207	0.05	0.0438856	307	0.08	0.0549968	417	0.12	0.0352767	530	0.02	0.0077289	530	0.02	0.00770365	530	0.02	0.00770694	370	0.04	0.0400514	370	0.04	0.0397253	370	0.04	0.0397648
WDR1_HUMAN	WD repeat-containing protein 1 OS=Homo sapiens GN=WDR1 PE=1 SV=4	66836	6.17	-0.238	Coagulation										36	0.05	0.00400564	36	0.05	0.00399255	36	0.05	0.00399426
ZA2G_HUMAN	Zinc-alpha-2-glycoprotein OS=Homo sapiens GN=AZGP1 PE=1 SV=2	34465	5.71	-0.576	Other plasma components	43	0.1	0.00938283	104	0.45	0.0330706													61	0.1	0.0107038	61	0.1	0.0106167	61	0.1	0.0106272
ZN486_HUMAN	Zinc finger protein 486 OS=Homo sapiens GN=ZNF486 PE=2 SV=4	55078	9.27	-0.893	Other plasma components																			63	0.06	0.0102634	63	0.06	0.0101798	63	0.06	0.0101899
ZNF48_HUMAN	Zinc finger protein 48 OS=Homo sapiens GN=ZNF48 PE=1 SV=2	69203	9.51	-0.971	Other plasma components				46	0.05	0.00737812	47	0.05	0.00315504	79	0.05	0.0041475	79	0.05	0.00413395	79	0.05	0.00413571
ZPI_HUMAN	Protein Z-dependent protease inhibitor OS=Homo sapiens GN=SERPINA10 PE=1 SV=1	50788	8.28	-0.231	Coagulation	51	0.06	0.00829599	93	0.21	0.0227421	211	0.29	0.0134298
