# Supplementary material for: Effective lock-in strategy for proteomic analysis of corona complexes bound to amino-free ligands of gold nanoparticles
Source: Royal Society of Chemistry journal article supplement (doi:10.1039/c8nr01077c), 2018-01-01
Supplement: c8nr01077c2.xlsx [file c8nr01077c2.xlsx]

## Sheet: Corona proteins
Supplementary Table S2. Cysteine-binding corona proteins and formaldehyde-linked unique peptides identified from Method III.
Uniprot ID	Protein description	Mascot score	MW (Da)	pI	Experiment 1	Experiment 2	Experiment 3
LV403_HUMAN	Ig lambda chain V-IV region Hil OS=Homo sapiens PE=1 SV=1	122	11624	6.04	√	√	√
HV103_HUMAN	Ig heavy chain V-I region V35 OS=Homo sapiens PE=1 SV=1	135	13114	9.59	√	√	√
HV320_HUMAN	Ig heavy chain V-III region GAL OS=Homo sapiens PE=1 SV=1	217	12836	8.7	√	√	√
E2F8_HUMAN	Transcription factor E2F8 OS=Homo sapiens GN=E2F8 PE=1 SV=1	32	94735	9.11	√	√	√
IGLC7_HUMAN	Ig lambda-7 chain C region OS=Homo sapiens GN=IGLC7 PE=4 SV=2	1060	11467	8.49		√	√
SIG16_HUMAN	Sialic acid-binding Ig-like lectin 16 OS=Homo sapiens GN=SIGLEC16 PE=2 SV=3	33	53757	9.28	√	√	√
FHAD1_HUMAN	Forkhead-associated domain-containing protein 1 OS=Homo sapiens GN=FHAD1 PE=2 SV=2	33	162659	6.52	√	√
IGLL5_HUMAN	Immunoglobulin lambda-like polypeptide 5 OS=Homo sapiens GN=IGLL5 PE=2 SV=2	1264	23391	9.08	√	√	√
CRCC2_HUMAN	Putative ciliary rootlet coiled-coil protein 2 OS=Homo sapiens GN=CROCC2 PE=5 SV=3	33	186900	5.42	√	√	√
MASP2_HUMAN	Mannan-binding lectin serine protease 2 OS=Homo sapiens GN=MASP2 PE=1 SV=4	54	77193	5.39	√	√	√
QSOX1_HUMAN	Sulfhydryl oxidase 1 OS=Homo sapiens GN=QSOX1 PE=1 SV=3	57	83324	9.13		√	√
APOL1_HUMAN	Apolipoprotein L1 OS=Homo sapiens GN=APOL1 PE=1 SV=5	187	44004	5.6	√	√	√
LECT2_HUMAN	Leukocyte cell-derived chemotaxin-2 OS=Homo sapiens GN=LECT2 PE=1 SV=2	92	16722	9.49	√	√	√
CHAD_HUMAN	Chondroadherin OS=Homo sapiens GN=CHAD PE=2 SV=2	43	40964	9.49		√	√
FANCA_HUMAN	Fanconi anemia group A protein OS=Homo sapiens GN=FANCA PE=1 SV=2	34	164838	6.13	√	√
ASAP2_HUMAN	Arf-GAP with SH3 domain, ANK repeat and PH domain-containing protein 2 OS=Homo sapiens GN=ASAP2 PE=1 SV=3	35	112835	6.24	√	√	√
KRT86_HUMAN	Keratin, type II cuticular Hb6 OS=Homo sapiens GN=KRT86 PE=1 SV=1	1860	55120	5.56		√	√
CD5L_HUMAN	CD5 antigen-like OS=Homo sapiens GN=CD5L PE=1 SV=1	1429	39603	5.28	√	√	√
K0556_HUMAN	Protein KIAA0556 OS=Homo sapiens GN=KIAA0556 PE=1 SV=4	26	181946	5.57	√	√	√
ANM3_HUMAN	Protein arginine N-methyltransferase 3 OS=Homo sapiens GN=PRMT3 PE=1 SV=3	33	60522	5.18		√	√
CAC1F_HUMAN	Voltage-dependent L-type calcium channel subunit alpha-1F OS=Homo sapiens GN=CACNA1F PE=1 SV=2	53	222931	5.76	√	√	√
CUTA_HUMAN	Protein CutA OS=Homo sapiens GN=CUTA PE=1 SV=2	15	19218	5.42	√		√
ROCK2_HUMAN	Rho-associated protein kinase 2 OS=Homo sapiens GN=ROCK2 PE=1 SV=4	34	161939	5.75	√	√	√
CILP1_HUMAN	Cartilage intermediate layer protein 1 OS=Homo sapiens GN=CILP PE=1 SV=4	27	134761	8.76	√	√
GGYF1_HUMAN	PERQ amino acid-rich with GYF domain-containing protein 1 OS=Homo sapiens GN=GIGYF1 PE=1 SV=2	33	115044	5.29	√	√	√
USH2A_HUMAN	Usherin OS=Homo sapiens GN=USH2A PE=1 SV=3	30	586293	6.4	√	√
ZN821_HUMAN	Zinc finger protein 821 OS=Homo sapiens GN=ZNF821 PE=1 SV=3	36	47334	6.14	√		√
FCN3_HUMAN	Ficolin-3 OS=Homo sapiens GN=FCN3 PE=1 SV=2	1559	33395	6.2	√	√	√
B3GL1_HUMAN	UDP-GalNAc:beta-1,3-N-acetylgalactosaminyltransferase 1 OS=Homo sapiens GN=B3GALNT1 PE=2 SV=1	33	39828	7.67	√	√	√
CAN15_HUMAN	Calpain-15 OS=Homo sapiens GN=CAPN15 PE=1 SV=1	30	119862	6.27		√	√
ATRN_HUMAN	Attractin OS=Homo sapiens GN=ATRN PE=1 SV=2	54	163450	7.24	√	√	√
KT33A_HUMAN	Keratin, type I cuticular Ha3-I OS=Homo sapiens GN=KRT33A PE=2 SV=2	1433	47166	4.78		√	√
HAUS5_HUMAN	HAUS augmin-like complex subunit 5 OS=Homo sapiens GN=HAUS5 PE=1 SV=2	33	72265	8.83	√	√	√
MRP6_HUMAN	Multidrug resistance-associated protein 6 OS=Homo sapiens GN=ABCC6 PE=1 SV=2	41	166398	8.82	√	√	√
APOM_HUMAN	Apolipoprotein M OS=Homo sapiens GN=APOM PE=1 SV=2	79	21582	5.66	√	√	√
K2C75_HUMAN	Keratin, type II cytoskeletal 75 OS=Homo sapiens GN=KRT75 PE=1 SV=2	1950	59809	7.6		√	√
TBCD8_HUMAN	TBC1 domain family member 8 OS=Homo sapiens GN=TBC1D8 PE=1 SV=3	15	132177	5.32	√		√
RECK_HUMAN	Reversion-inducing cysteine-rich protein with Kazal motifs OS=Homo sapiens GN=RECK PE=1 SV=1	34	111460	6.35	√		√
APCL_HUMAN	Adenomatous polyposis coli protein 2 OS=Homo sapiens GN=APC2 PE=1 SV=1	35	245966	9.08	√		√
CERU_HUMAN	Ceruloplasmin OS=Homo sapiens GN=CP PE=1 SV=1	924	122983	5.44	√	√	√
MOS_HUMAN	Proto-oncogene serine/threonine-protein kinase mos OS=Homo sapiens GN=MOS PE=1 SV=1	32	38366	9.15	√	√	√
THRB_HUMAN	Prothrombin OS=Homo sapiens GN=F2 PE=1 SV=2	482	71475	5.64	√	√	√
C1R_HUMAN	Complement C1r subcomponent OS=Homo sapiens GN=C1R PE=1 SV=2	610	81606	5.82	√	√	√
HPT_HUMAN	Haptoglobin OS=Homo sapiens GN=HP PE=1 SV=1	790	45861	6.13	√	√	√
HPTR_HUMAN	Haptoglobin-related protein OS=Homo sapiens GN=HPR PE=2 SV=2	1144	39518	6.63	√	√	√
CFAD_HUMAN	Complement factor D OS=Homo sapiens GN=CFD PE=1 SV=5	343	27529	7.64	√	√	√
PLMN_HUMAN	Plasminogen OS=Homo sapiens GN=PLG PE=1 SV=2	1347	93247	7.04	√	√	√
FA12_HUMAN	Coagulation factor XII OS=Homo sapiens GN=F12 PE=1 SV=3	294	70029	8.04	√	√	√
CFAB_HUMAN	Complement factor B OS=Homo sapiens GN=CFB PE=1 SV=2	552	86847	6.67	√	√	√
ANT3_HUMAN	Antithrombin-III OS=Homo sapiens GN=SERPINC1 PE=1 SV=1	581	53025	6.32	√	√	√
A1AT_HUMAN	Alpha-1-antitrypsin OS=Homo sapiens GN=SERPINA1 PE=1 SV=3	1891	46878	5.37	√	√	√
AACT_HUMAN	Alpha-1-antichymotrypsin OS=Homo sapiens GN=SERPINA3 PE=1 SV=2	518	47792	5.33	√	√	√
ANGT_HUMAN	Angiotensinogen OS=Homo sapiens GN=AGT PE=1 SV=1	388	53406	5.87	√	√	√
A2MG_HUMAN	Alpha-2-macroglobulin OS=Homo sapiens GN=A2M PE=1 SV=3	1849	164613	6.03	√	√	√
CO3_HUMAN	Complement C3 OS=Homo sapiens GN=C3 PE=1 SV=2	3561	188569	6.02	√	√	√
CO5_HUMAN	Complement C5 OS=Homo sapiens GN=C5 PE=1 SV=4	631	189897	6.11	√	√	√
CYTC_HUMAN	Cystatin-C OS=Homo sapiens GN=CST3 PE=1 SV=1	137	16017	9	√	√	√
KNG1_HUMAN	Kininogen-1 OS=Homo sapiens GN=KNG1 PE=1 SV=2	2221	72996	6.34	√	√	√
TGFB1_HUMAN	Transforming growth factor beta-1 OS=Homo sapiens GN=TGFB1 PE=1 SV=2	62	44997	8.83		√	√
IGF2_HUMAN	Insulin-like growth factor II OS=Homo sapiens GN=IGF2 PE=1 SV=1	47	20583	9.5	√	√
IGJ_HUMAN	Immunoglobulin J chain OS=Homo sapiens GN=JCHAIN PE=1 SV=4	539	18543	5.12	√	√	√
KVD33_HUMAN	Ig kappa chain V-I region Ni OS=Homo sapiens PE=1 SV=1	138	12352	5.25	√	√	√
KV139_HUMAN	Ig kappa chain V-I region OU OS=Homo sapiens PE=1 SV=1	314	11884	9.94		√	√
KV117_HUMAN	Ig kappa chain V-I region WEA OS=Homo sapiens PE=1 SV=1	373	11947	9.07		√	√
KV105_HUMAN	Ig kappa chain V-I region DEE OS=Homo sapiens PE=1 SV=1	357	11768	9.43	√	√	√
KVD12_HUMAN	Ig kappa chain V-I region Wes OS=Homo sapiens PE=1 SV=1	142	11715	6.92	√	√	√
KVD40_HUMAN	Ig kappa chain V-II region Cum OS=Homo sapiens PE=1 SV=1	189	12782	5.28	√	√	√
KVD28_HUMAN	Ig kappa chain V-II region TEW OS=Homo sapiens PE=1 SV=1	386	12422	5.69	√	√	√
KV320_HUMAN	Ig kappa chain V-III region B6 OS=Homo sapiens PE=1 SV=1	263	11742	9.34	√	√	√
LV144_HUMAN	Ig lambda chain V-I region VOR OS=Homo sapiens PE=1 SV=1	32	11622	5.03	√	√
LV147_HUMAN	Ig lambda chain V-I region WAH OS=Homo sapiens PE=1 SV=1	161	11832	6.29	√	√	√
LV151_HUMAN	Ig lambda chain V-I region NIG-64 OS=Homo sapiens PE=1 SV=1	76	11561	4.66	√	√	√
LV301_HUMAN	Ig lambda chain V-III region SH OS=Homo sapiens PE=1 SV=1	68	11500	6.02	√	√	√
HV169_HUMAN	Ig heavy chain V-I region EU OS=Homo sapiens PE=1 SV=1	56	12578	6.4	√	√
HV311_HUMAN	Ig heavy chain V-III region KOL OS=Homo sapiens PE=1 SV=1	81	13938	5.52	√	√
HV348_HUMAN	Ig heavy chain V-III region WEA OS=Homo sapiens PE=1 SV=1	137	12363	8.7	√	√	√
HV323_HUMAN	Ig heavy chain V-III region 23 OS=Homo sapiens GN=IGHV3-23 PE=1 SV=2	318	12745	8.49	√	√	√
HV313_HUMAN	Ig heavy chain V-III region BRO OS=Homo sapiens PE=1 SV=1	115	13332	6.45	√	√	√
HV353_HUMAN	Ig heavy chain V-III region BUT OS=Homo sapiens PE=1 SV=1	225	12485	9.34	√	√	√
HV330_HUMAN	Ig heavy chain V-III region GA OS=Homo sapiens PE=1 SV=1	64	13271	9.8	√	√	√
HV333_HUMAN	Ig heavy chain V-III region HIL OS=Homo sapiens PE=1 SV=1	73	13671	9.43	√	√	√
HV307_HUMAN	Ig heavy chain V-III region CAM OS=Homo sapiens PE=1 SV=1	314	13773	9.65	√	√	√
HV309_HUMAN	Ig heavy chain V-III region NIE OS=Homo sapiens PE=1 SV=1	72	13348	9.75	√	√
HV270_HUMAN	Ig heavy chain V-II region OU OS=Homo sapiens PE=1 SV=1	47	14381	9.85	√	√	√
HV439_HUMAN	Ig heavy chain V-II region WAH OS=Homo sapiens PE=1 SV=1	96	14222	8.62	√	√	√
PIGR_HUMAN	Polymeric immunoglobulin receptor OS=Homo sapiens GN=PIGR PE=1 SV=4	117	84429	5.58	√	√	√
IGHG1_HUMAN	Ig gamma-1 chain C region OS=Homo sapiens GN=IGHG1 PE=1 SV=1	3025	36596	8.46	√	√	√
IGHG2_HUMAN	Ig gamma-2 chain C region OS=Homo sapiens GN=IGHG2 PE=1 SV=2	2863	36505	7.66	√	√	√
IGHG3_HUMAN	Ig gamma-3 chain C region OS=Homo sapiens GN=IGHG3 PE=1 SV=2	2184	42287	8.23	√	√	√
IGHG4_HUMAN	Ig gamma-4 chain C region OS=Homo sapiens GN=IGHG4 PE=1 SV=1	1193	36431	7.18	√	√	√
IGHM_HUMAN	Ig mu chain C region OS=Homo sapiens GN=IGHM PE=1 SV=3	3611	49960	6.35	√	√	√
IGHA1_HUMAN	Ig alpha-1 chain C region OS=Homo sapiens GN=IGHA1 PE=1 SV=2	1224	38486	6.08	√	√	√
IGHA2_HUMAN	Ig alpha-2 chain C region OS=Homo sapiens GN=IGHA2 PE=1 SV=3	1043	37301	5.71	√	√	√
IGHD_HUMAN	Ig delta chain C region OS=Homo sapiens GN=IGHD PE=1 SV=2	36	42683	8.13		√	√
HBD_HUMAN	Hemoglobin subunit delta OS=Homo sapiens GN=HBD PE=1 SV=2	45	16159	7.85	√		√
HBE_HUMAN	Hemoglobin subunit epsilon OS=Homo sapiens GN=HBE1 PE=1 SV=2	45	16249	8.67	√		√
K1C14_HUMAN	Keratin, type I cytoskeletal 14 OS=Homo sapiens GN=KRT14 PE=1 SV=4	4986	51872	5.09	√	√	√
K2C6A_HUMAN	Keratin, type II cytoskeletal 6A OS=Homo sapiens GN=KRT6A PE=1 SV=3	3412	60293	8.09	√	√	√
APOA1_HUMAN	Apolipoprotein A-I OS=Homo sapiens GN=APOA1 PE=1 SV=1	1930	30759	5.56	√	√	√
APOE_HUMAN	Apolipoprotein E OS=Homo sapiens GN=APOE PE=1 SV=1	762	36246	5.65	√	√	√
APOA2_HUMAN	Apolipoprotein A-II OS=Homo sapiens GN=APOA2 PE=1 SV=1	65	11282	6.26	√	√	√
APOC1_HUMAN	Apolipoprotein C-I OS=Homo sapiens GN=APOC1 PE=1 SV=1	88	9326	8.01	√	√	√
APOC3_HUMAN	Apolipoprotein C-III OS=Homo sapiens GN=APOC3 PE=1 SV=1	294	10846	5.23	√	√	√
FIBA_HUMAN	Fibrinogen alpha chain OS=Homo sapiens GN=FGA PE=1 SV=2	3706	95656	5.7	√	√	√
FIBB_HUMAN	Fibrinogen beta chain OS=Homo sapiens GN=FGB PE=1 SV=2	10084	56577	8.54	√	√	√
FIBG_HUMAN	Fibrinogen gamma chain OS=Homo sapiens GN=FGG PE=1 SV=3	4356	52106	5.37	√	√	√
CRP_HUMAN	C-reactive protein OS=Homo sapiens GN=CRP PE=1 SV=1	123	25194	5.45	√	√	√
SAMP_HUMAN	Serum amyloid P-component OS=Homo sapiens GN=APCS PE=1 SV=2	296	25485	6.1	√	√	√
C1QA_HUMAN	Complement C1q subcomponent subunit A OS=Homo sapiens GN=C1QA PE=1 SV=2	1693	26285	9.26	√	√	√
C1QB_HUMAN	Complement C1q subcomponent subunit B OS=Homo sapiens GN=C1QB PE=1 SV=3	8351	26933	8.83	√	√	√
C1QC_HUMAN	Complement C1q subcomponent subunit C OS=Homo sapiens GN=C1QC PE=1 SV=3	3939	25985	8.61	√	√	√
CO9_HUMAN	Complement component C9 OS=Homo sapiens GN=C9 PE=1 SV=2	334	64615	5.43	√	√	√
APOH_HUMAN	Beta-2-glycoprotein 1 OS=Homo sapiens GN=APOH PE=1 SV=3	1077	39584	8.34	√	√	√
A2GL_HUMAN	Leucine-rich alpha-2-glycoprotein OS=Homo sapiens GN=LRG1 PE=1 SV=2	68	38382	6.45	√	√	√
FINC_HUMAN	Fibronectin OS=Homo sapiens GN=FN1 PE=1 SV=4	2923	266052	5.46	√	√	√
RET4_HUMAN	Retinol-binding protein 4 OS=Homo sapiens GN=RBP4 PE=1 SV=3	162	23337	5.76	√	√	√
AMBP_HUMAN	Protein AMBP OS=Homo sapiens GN=AMBP PE=1 SV=1	453	39886	5.95	√	√	√
A1AG1_HUMAN	Alpha-1-acid glycoprotein 1 OS=Homo sapiens GN=ORM1 PE=1 SV=1	209	23725	4.93	√	√	√
FETUA_HUMAN	Alpha-2-HS-glycoprotein OS=Homo sapiens GN=AHSG PE=1 SV=1	519	40098	5.43	√	√	√
TTHY_HUMAN	Transthyretin OS=Homo sapiens GN=TTR PE=1 SV=1	313	15991	5.52	√	√	√
ALBU_HUMAN	Serum albumin OS=Homo sapiens GN=ALB PE=1 SV=2	9399	71317	5.92	√	√	√
VTDB_HUMAN	Vitamin D-binding protein OS=Homo sapiens GN=GC PE=1 SV=1	646	54526	5.4	√	√	√
CXCL7_HUMAN	Platelet basic protein OS=Homo sapiens GN=PPBP PE=1 SV=3	146	14171	9.04	√	√	√
PLF4_HUMAN	Platelet factor 4 OS=Homo sapiens GN=PF4 PE=1 SV=2	190	11123	8.93	√	√	√
TRFE_HUMAN	Serotransferrin OS=Homo sapiens GN=TF PE=1 SV=3	3134	79294	6.81	√	√	√
TRFL_HUMAN	Lactotransferrin OS=Homo sapiens GN=LTF PE=1 SV=6	112	80014	8.5		√	√
HEMO_HUMAN	Hemopexin OS=Homo sapiens GN=HPX PE=1 SV=2	1040	52385	6.55	√	√	√
ANGI_HUMAN	Angiogenin OS=Homo sapiens GN=ANG PE=1 SV=1	204	16882	9.73	√	√	√
FA11_HUMAN	Coagulation factor XI OS=Homo sapiens GN=F11 PE=1 SV=1	637	72116	8.47	√	√	√
KLKB1_HUMAN	Plasma kallikrein OS=Homo sapiens GN=KLKB1 PE=1 SV=1	203	73433	8.6	√	√	√
C4BPA_HUMAN	C4b-binding protein alpha chain OS=Homo sapiens GN=C4BPA PE=1 SV=2	2106	69042	7.15	√	√	√
VTNC_HUMAN	Vitronectin OS=Homo sapiens GN=VTN PE=1 SV=1	793	55069	5.55	√	√	√
PROC_HUMAN	Vitamin K-dependent protein C OS=Homo sapiens GN=PROC PE=1 SV=1	38	53406	5.85	√	√
APOB_HUMAN	Apolipoprotein B-100 OS=Homo sapiens GN=APOB PE=1 SV=2	5012	516651	6.58	√	√	√
HRG_HUMAN	Histidine-rich glycoprotein OS=Homo sapiens GN=HRG PE=1 SV=1	631	60510	7.09	√	√	√
LV743_HUMAN	Ig lambda chain V region 4A OS=Homo sapiens PE=4 SV=1	50	12600	6.51	√	√	√
A1BG_HUMAN	Alpha-1B-glycoprotein OS=Homo sapiens GN=A1BG PE=1 SV=4	431	54790	5.56	√	√	√
K2C6B_HUMAN	Keratin, type II cytoskeletal 6B OS=Homo sapiens GN=KRT6B PE=1 SV=5	4347	60315	8.09	√	√	√
K2C1_HUMAN	Keratin, type II cytoskeletal 1 OS=Homo sapiens GN=KRT1 PE=1 SV=6	13724	66170	8.15	√	√	√
VWF_HUMAN	von Willebrand factor OS=Homo sapiens GN=VWF PE=1 SV=4	906	322401	5.29	√	√	√
G3P_HUMAN	Glyceraldehyde-3-phosphate dehydrogenase OS=Homo sapiens GN=GAPDH PE=1 SV=3	675	36201	8.57		√	√
KV116_HUMAN	Ig kappa chain V-I region Roy OS=Homo sapiens PE=1 SV=1	250	11889	5.12	√	√	√
KV311_HUMAN	Ig kappa chain V-III region VG (Fragment) OS=Homo sapiens PE=1 SV=1	136	12681	4.85	√	√	√
A4_HUMAN	Amyloid beta A4 protein OS=Homo sapiens GN=APP PE=1 SV=3	179	87914	4.73	√	√	√
APOD_HUMAN	Apolipoprotein D OS=Homo sapiens GN=APOD PE=1 SV=1	202	21547	5.06	√	√	√
S10A8_HUMAN	Protein S100-A8 OS=Homo sapiens GN=S100A8 PE=1 SV=1	133	10885	6.51		√	√
IPSP_HUMAN	Plasma serine protease inhibitor OS=Homo sapiens GN=SERPINA5 PE=1 SV=3	818	45760	9.3	√	√	√
IC1_HUMAN	Plasma protease C1 inhibitor OS=Homo sapiens GN=SERPING1 PE=1 SV=2	875	55347	6.09	√	√	√
CFAI_HUMAN	Complement factor I OS=Homo sapiens GN=CFI PE=1 SV=2	85	68102	7.72	√	√	√
F13B_HUMAN	Coagulation factor XIII B chain OS=Homo sapiens GN=F13B PE=1 SV=3	53	77742	6.01	√	√	√
PCCB_HUMAN	Propionyl-CoA carboxylase beta chain, mitochondrial OS=Homo sapiens GN=PCCB PE=1 SV=3	35	58806	7.56	√		√
RPC4_HUMAN	DNA-directed RNA polymerase III subunit RPC4 OS=Homo sapiens GN=POLR3D PE=1 SV=2	29	44539	6.51	√	√	√
TETN_HUMAN	Tetranectin OS=Homo sapiens GN=CLEC3B PE=1 SV=3	120	22921	5.52	√	√	√
HEP2_HUMAN	Heparin cofactor 2 OS=Homo sapiens GN=SERPIND1 PE=1 SV=3	222	57205	6.41	√	√	√
K1C18_HUMAN	Keratin, type I cytoskeletal 18 OS=Homo sapiens GN=KRT18 PE=1 SV=2	65	48029	5.34		√	√
MYL1_HUMAN	Myosin light chain 1/3, skeletal muscle isoform OS=Homo sapiens GN=MYL1 PE=2 SV=3	43	21189	4.97	√	√	√
KV230_HUMAN	Ig kappa chain V-II region RPMI 6410 OS=Homo sapiens PE=4 SV=1	190	14811	9.34	√	√	√
KV401_HUMAN	Ig kappa chain V-IV region Len OS=Homo sapiens PE=1 SV=2	193	12746	7.92	√	√	√
HV434_HUMAN	Ig heavy chain V-II region ARH-77 OS=Homo sapiens PE=4 SV=1	143	16389	8.45	√	√	√
GELS_HUMAN	Gelsolin OS=Homo sapiens GN=GSN PE=1 SV=1	755	86043	5.9	√	√	√
ATPB_HUMAN	ATP synthase subunit beta, mitochondrial OS=Homo sapiens GN=ATP5B PE=1 SV=3	51	56525	5.26	√	√	√
CO2_HUMAN	Complement C2 OS=Homo sapiens GN=C2 PE=1 SV=2	38	84583	7.23	√	√	√
APOA4_HUMAN	Apolipoprotein A-IV OS=Homo sapiens GN=APOA4 PE=1 SV=3	1140	45371	5.28	√	√	√
PROS_HUMAN	Vitamin K-dependent protein S OS=Homo sapiens GN=PROS1 PE=1 SV=1	158	77127	5.48	√	√	√
ANXA2_HUMAN	Annexin A2 OS=Homo sapiens GN=ANXA2 PE=1 SV=2	534	38808	7.57		√	√
CO8A_HUMAN	Complement component C8 alpha chain OS=Homo sapiens GN=C8A PE=1 SV=2	63	66832	6.07	√	√
CO8B_HUMAN	Complement component C8 beta chain OS=Homo sapiens GN=C8B PE=1 SV=3	95	68714	8.5	√	√	√
CO8G_HUMAN	Complement component C8 gamma chain OS=Homo sapiens GN=C8G PE=1 SV=3	125	22435	8.49	√	√	√
TSP1_HUMAN	Thrombospondin-1 OS=Homo sapiens GN=THBS1 PE=1 SV=2	6888	133291	4.71	√	√	√
CBG_HUMAN	Corticosteroid-binding globulin OS=Homo sapiens GN=SERPINA6 PE=1 SV=1	44	45283	5.64	√	√
ITA2B_HUMAN	Integrin alpha-IIb OS=Homo sapiens GN=ITGA2B PE=1 SV=3	99	114446	5.21		√	√
APOA_HUMAN	Apolipoprotein(a) OS=Homo sapiens GN=LPA PE=1 SV=1	80	514737	5.58	√	√	√
CD14_HUMAN	Monocyte differentiation antigen CD14 OS=Homo sapiens GN=CD14 PE=1 SV=2	103	40678	5.84	√	√
CFAH_HUMAN	Complement factor H OS=Homo sapiens GN=CFH PE=1 SV=4	4803	143680	6.21	√	√	√
A2AP_HUMAN	Alpha-2-antiplasmin OS=Homo sapiens GN=SERPINF2 PE=1 SV=3	403	54873	5.87	√	√	√
K1C19_HUMAN	Keratin, type I cytoskeletal 19 OS=Homo sapiens GN=KRT19 PE=1 SV=4	580	44079	5.04		√	√
K1C16_HUMAN	Keratin, type I cytoskeletal 16 OS=Homo sapiens GN=KRT16 PE=1 SV=4	4793	51578	4.99	√	√	√
DLDH_HUMAN	Dihydrolipoyl dehydrogenase, mitochondrial OS=Homo sapiens GN=DLD PE=1 SV=2	35	54713	7.95	√		√
C1S_HUMAN	Complement C1s subcomponent OS=Homo sapiens GN=C1S PE=1 SV=1	329	78174	4.86	√	√	√
CO4A_HUMAN	Complement C4-A OS=Homo sapiens GN=C4A PE=1 SV=2	1254	194261	6.65	√	√	√
CO4B_HUMAN	Complement C4-B OS=Homo sapiens GN=C4B PE=1 SV=2	1346	194170	6.89	√	√	√
IGLC1_HUMAN	Ig lambda-1 chain C regions OS=Homo sapiens GN=IGLC1 PE=1 SV=1	385	11512	7.89	√	√	√
IGLC2_HUMAN	Ig lambda-2 chain C regions OS=Homo sapiens GN=IGLC2 PE=1 SV=1	879	11458	6.92	√	√	√
IGLC3_HUMAN	Ig lambda-3 chain C regions OS=Homo sapiens GN=IGLC3 PE=1 SV=1	871	11402	6.92		√	√
KV113_HUMAN	Ig kappa chain V-I region Lay OS=Homo sapiens PE=1 SV=1	65	11941	7.96	√	√	√
SRGN_HUMAN	Serglycin OS=Homo sapiens GN=SRGN PE=1 SV=3	92	17812	4.81	√	√	√
CO7_HUMAN	Complement component C7 OS=Homo sapiens GN=C7 PE=1 SV=2	98	96650	6.09	√	√	√
TFPI1_HUMAN	Tissue factor pathway inhibitor OS=Homo sapiens GN=TFPI PE=1 SV=1	72	36075	8.61	√	√	√
PF4V_HUMAN	Platelet factor 4 variant OS=Homo sapiens GN=PF4V1 PE=1 SV=1	201	11773	9.3		√	√
IGKC_HUMAN	Ig kappa chain C region OS=Homo sapiens GN=IGKC PE=1 SV=1	5668	11773	5.58	√	√	√
CLUS_HUMAN	Clusterin OS=Homo sapiens GN=CLU PE=1 SV=1	1171	53031	5.89	√	√	√
LAMP1_HUMAN	Lysosome-associated membrane glycoprotein 1 OS=Homo sapiens GN=LAMP1 PE=1 SV=3	32	45367	9	√	√	√
CETP_HUMAN	Cholesteryl ester transfer protein OS=Homo sapiens GN=CETP PE=1 SV=2	132	55120	5.7	√	√	√
CO6A1_HUMAN	Collagen alpha-1(VI) chain OS=Homo sapiens GN=COL6A1 PE=1 SV=3	112	109602	5.26		√	√
CO6A2_HUMAN	Collagen alpha-2(VI) chain OS=Homo sapiens GN=COL6A2 PE=1 SV=4	39	109709	5.85		√	√
CO6A3_HUMAN	Collagen alpha-3(VI) chain OS=Homo sapiens GN=COL6A3 PE=1 SV=5	213	345167	6.26	√	√	√
FA5_HUMAN	Coagulation factor V OS=Homo sapiens GN=F5 PE=1 SV=4	3175	252686	5.68	√	√	√
CADH1_HUMAN	Cadherin-1 OS=Homo sapiens GN=CDH1 PE=1 SV=3	120	97852	4.58	√	√	√
CSPG2_HUMAN	Versican core protein OS=Homo sapiens GN=VCAN PE=1 SV=3	111	374585	4.43	√	√	√
K1C10_HUMAN	Keratin, type I cytoskeletal 10 OS=Homo sapiens GN=KRT10 PE=1 SV=6	4270	59020	5.13	√	√	√
K1C13_HUMAN	Keratin, type I cytoskeletal 13 OS=Homo sapiens GN=KRT13 PE=1 SV=4	665	49900	4.91	√	√	√
K2C5_HUMAN	Keratin, type II cytoskeletal 5 OS=Homo sapiens GN=KRT5 PE=1 SV=3	2007	62568	7.59	√	√	√
CO6_HUMAN	Complement component C6 OS=Homo sapiens GN=C6 PE=1 SV=3	209	108367	6.39	√	√	√
NID1_HUMAN	Nidogen-1 OS=Homo sapiens GN=NID1 PE=1 SV=3	68	139142	5.12	√	√	√
ENPL_HUMAN	Endoplasmin OS=Homo sapiens GN=HSP90B1 PE=1 SV=1	27	92696	4.76		√	√
PLAK_HUMAN	Junction plakoglobin OS=Homo sapiens GN=JUP PE=1 SV=3	1278	82434	5.75	√	√	√
CBPN_HUMAN	Carboxypeptidase N catalytic chain OS=Homo sapiens GN=CPN1 PE=1 SV=1	270	52538	6.86	√	√	√
DESP_HUMAN	Desmoplakin OS=Homo sapiens GN=DSP PE=1 SV=3	1503	334021	6.44	√	√	√
IBP2_HUMAN	Insulin-like growth factor-binding protein 2 OS=Homo sapiens GN=IGFBP2 PE=1 SV=2	177	35875	7.48	√	√	√
LBP_HUMAN	Lipopolysaccharide-binding protein OS=Homo sapiens GN=LBP PE=1 SV=3	324	53521	6.23	√	√	√
K1C15_HUMAN	Keratin, type I cytoskeletal 15 OS=Homo sapiens GN=KRT15 PE=1 SV=3	1337	49409	4.71		√	√
K2C4_HUMAN	Keratin, type II cytoskeletal 4 OS=Homo sapiens GN=KRT4 PE=1 SV=4	252	57649	6.25		√	√
A1AG2_HUMAN	Alpha-1-acid glycoprotein 2 OS=Homo sapiens GN=ORM2 PE=1 SV=2	188	23873	5.03	√	√	√
ITIH2_HUMAN	Inter-alpha-trypsin inhibitor heavy chain H2 OS=Homo sapiens GN=ITIH2 PE=1 SV=2	469	106853	6.4	√	√	√
ITIH1_HUMAN	Inter-alpha-trypsin inhibitor heavy chain H1 OS=Homo sapiens GN=ITIH1 PE=1 SV=3	904	101782	6.31	√	√	√
COX5A_HUMAN	Cytochrome c oxidase subunit 5A, mitochondrial OS=Homo sapiens GN=COX5A PE=1 SV=2	30	16923	6.3	√	√	√
C4BPB_HUMAN	C4b-binding protein beta chain OS=Homo sapiens GN=C4BPB PE=1 SV=1	191	29308	5.05	√	√	√
PGS1_HUMAN	Biglycan OS=Homo sapiens GN=BGN PE=1 SV=2	99	42027	7.16	√	√	√
TENX_HUMAN	Tenascin-X OS=Homo sapiens GN=TNXB PE=1 SV=4	1422	464946	5.05	√	√	√
GPX3_HUMAN	Glutathione peroxidase 3 OS=Homo sapiens GN=GPX3 PE=1 SV=2	96	25765	8.26	√	√	√
IBP4_HUMAN	Insulin-like growth factor-binding protein 4 OS=Homo sapiens GN=IGFBP4 PE=1 SV=2	80	29113	6.81	√	√	√
HV102_HUMAN	Ig heavy chain V-I region HG3 OS=Homo sapiens PE=3 SV=1	98	13108	9.1	√	√	√
KALM_HUMAN	Anosmin-1 OS=Homo sapiens GN=ANOS1 PE=1 SV=3	28	77489	9.33	√	√	√
RS3_HUMAN	40S ribosomal protein S3 OS=Homo sapiens GN=RPS3 PE=1 SV=2	31	26842	9.68		√	√
IBP5_HUMAN	Insulin-like growth factor-binding protein 5 OS=Homo sapiens GN=IGFBP5 PE=1 SV=1	70	31576	8.58	√	√	√
TENA_HUMAN	Tenascin OS=Homo sapiens GN=TNC PE=1 SV=3	606	246345	4.79	√	√	√
ZA2G_HUMAN	Zinc-alpha-2-glycoprotein OS=Homo sapiens GN=AZGP1 PE=1 SV=2	199	34465	5.71	√	√	√
ATPA_HUMAN	ATP synthase subunit alpha, mitochondrial OS=Homo sapiens GN=ATP5A1 PE=1 SV=1	53	59828	9.16	√	√	√
HGFL_HUMAN	Hepatocyte growth factor-like protein OS=Homo sapiens GN=MST1 PE=1 SV=2	138	82833	7.98	√	√	√
PON1_HUMAN	Serum paraoxonase/arylesterase 1 OS=Homo sapiens GN=PON1 PE=1 SV=3	567	39877	5.08	√	√	√
PROP_HUMAN	Properdin OS=Homo sapiens GN=CFP PE=1 SV=2	178	53751	8.32	√	√	√
KAIN_HUMAN	Kallistatin OS=Homo sapiens GN=SERPINA4 PE=1 SV=3	117	48682	7.33	√	√	√
GSTT1_HUMAN	Glutathione S-transferase theta-1 OS=Homo sapiens GN=GSTT1 PE=1 SV=4	40	27489	7.01	√	√	√
S10A7_HUMAN	Protein S100-A7 OS=Homo sapiens GN=S100A7 PE=1 SV=4	106	11578	6.28		√	√
MRP1_HUMAN	Multidrug resistance-associated protein 1 OS=Homo sapiens GN=ABCC1 PE=1 SV=3	48	172907	6.71	√	√	√
H2B1B_HUMAN	Histone H2B type 1-B OS=Homo sapiens GN=HIST1H2BB PE=1 SV=2	22	13942	10.31	√		√
RNAS4_HUMAN	Ribonuclease 4 OS=Homo sapiens GN=RNASE4 PE=1 SV=3	57	17286	9.3	√	√	√
TSP4_HUMAN	Thrombospondin-4 OS=Homo sapiens GN=THBS4 PE=1 SV=2	1419	108482	4.44	√	√	√
K1C9_HUMAN	Keratin, type I cytoskeletal 9 OS=Homo sapiens GN=KRT9 PE=1 SV=3	10177	62255	5.14	√	√	√
SAA4_HUMAN	Serum amyloid A-4 protein OS=Homo sapiens GN=SAA4 PE=1 SV=2	50	14851	9.17	√	√	√
ALS_HUMAN	Insulin-like growth factor-binding protein complex acid labile subunit OS=Homo sapiens GN=IGFALS PE=1 SV=1	227	66735	6.33		√	√
K22E_HUMAN	Keratin, type II cytoskeletal 2 epidermal OS=Homo sapiens GN=KRT2 PE=1 SV=2	6761	65678	8.07	√	√	√
PEDF_HUMAN	Pigment epithelium-derived factor OS=Homo sapiens GN=SERPINF1 PE=1 SV=4	382	46454	5.97	√	√	√
FHR2_HUMAN	Complement factor H-related protein 2 OS=Homo sapiens GN=CFHR2 PE=1 SV=1	358	31543	6	√	√	√
COIA1_HUMAN	Collagen alpha-1(XVIII) chain OS=Homo sapiens GN=COL18A1 PE=1 SV=5	234	179389	5.67	√	√	√
STAT1_HUMAN	Signal transducer and activator of transcription 1-alpha/beta OS=Homo sapiens GN=STAT1 PE=1 SV=2	29	87850	5.74	√	√	√
AFAM_HUMAN	Afamin OS=Homo sapiens GN=AFM PE=1 SV=1	337	70963	5.64	√	√	√
IQGA1_HUMAN	Ras GTPase-activating-like protein IQGAP1 OS=Homo sapiens GN=IQGAP1 PE=1 SV=1	31	189761	6.08	√	√	√
K2C6C_HUMAN	Keratin, type II cytoskeletal 6C OS=Homo sapiens GN=KRT6C PE=1 SV=3	4864	60273	8.09		√	√
TSP3_HUMAN	Thrombospondin-3 OS=Homo sapiens GN=THBS3 PE=1 SV=1	302	106872	4.43	√	√	√
COMP_HUMAN	Cartilage oligomeric matrix protein OS=Homo sapiens GN=COMP PE=1 SV=2	773	85431	4.36	√	√	√
NU153_HUMAN	Nuclear pore complex protein Nup153 OS=Homo sapiens GN=NUP153 PE=1 SV=2	32	155440	8.97	√		√
SEPP1_HUMAN	Selenoprotein P OS=Homo sapiens GN=SEPP1 PE=1 SV=3	209	44126	8.08	√	√	√
LUM_HUMAN	Lumican OS=Homo sapiens GN=LUM PE=1 SV=2	62	38747	6.16	√	√	√
XPO2_HUMAN	Exportin-2 OS=Homo sapiens GN=CSE1L PE=1 SV=3	46	111145	5.51	√	√	√
ACTB_HUMAN	Actin, cytoplasmic 1 OS=Homo sapiens GN=ACTB PE=1 SV=1	288	42052	5.29	√	√	√
LYSC_HUMAN	Lysozyme C OS=Homo sapiens GN=LYZ PE=1 SV=1	134	16982	9.38	√	√	√
H4_HUMAN	Histone H4 OS=Homo sapiens GN=HIST1H4A PE=1 SV=2	166	11360	11.36	√	√	√
RS15_HUMAN	40S ribosomal protein S15 OS=Homo sapiens GN=RPS15 PE=1 SV=2	25	17029	10.39	√	√
EF1A1_HUMAN	Elongation factor 1-alpha 1 OS=Homo sapiens GN=EEF1A1 PE=1 SV=1	42	50451	9.1	√	√	√
HBB_HUMAN	Hemoglobin subunit beta OS=Homo sapiens GN=HBB PE=1 SV=2	110	16102	6.75	√	√	√
HBA_HUMAN	Hemoglobin subunit alpha OS=Homo sapiens GN=HBA1 PE=1 SV=2	100	15305	8.72	√	√	√
KRT85_HUMAN	Keratin, type II cuticular Hb5 OS=Homo sapiens GN=KRT85 PE=1 SV=1	1689	57306	6.28		√	√
RELN_HUMAN	Reelin OS=Homo sapiens GN=RELN PE=1 SV=3	760	394980	5.54	√	√	√
LV321_HUMAN	Ig lambda chain V-III region LOI OS=Homo sapiens PE=1 SV=1	172	12042	4.95	√	√	√
DCD_HUMAN	Dermcidin OS=Homo sapiens GN=DCD PE=1 SV=2	98	11391	6.08	√	√	√
PGBM_HUMAN	Basement membrane-specific heparan sulfate proteoglycan core protein OS=Homo sapiens GN=HSPG2 PE=1 SV=4	253	479253	6.06		√	√
MPCP_HUMAN	Phosphate carrier protein, mitochondrial OS=Homo sapiens GN=SLC25A3 PE=1 SV=2	39	40525	9.45		√	√
CLH1_HUMAN	Clathrin heavy chain 1 OS=Homo sapiens GN=CLTC PE=1 SV=5	26	193260	5.48	√	√	√
FABP5_HUMAN	Fatty acid-binding protein, epidermal OS=Homo sapiens GN=FABP5 PE=1 SV=3	90	15497	6.6	√	√	√
DSG1_HUMAN	Desmoglein-1 OS=Homo sapiens GN=DSG1 PE=1 SV=2	906	114702	4.9		√	√
TOP2B_HUMAN	DNA topoisomerase 2-beta OS=Homo sapiens GN=TOP2B PE=1 SV=3	30	184122	8.14	√	√	√
FHR1_HUMAN	Complement factor H-related protein 1 OS=Homo sapiens GN=CFHR1 PE=1 SV=2	857	38766	7.38	√	√	√
K1C17_HUMAN	Keratin, type I cytoskeletal 17 OS=Homo sapiens GN=KRT17 PE=1 SV=2	1458	48361	4.97	√	√	√
ITIH3_HUMAN	Inter-alpha-trypsin inhibitor heavy chain H3 OS=Homo sapiens GN=ITIH3 PE=1 SV=2	54	100072	5.49	√	√	√
FOXM1_HUMAN	Forkhead box protein M1 OS=Homo sapiens GN=FOXM1 PE=1 SV=3	23	84686	8	√		√
LG3BP_HUMAN	Galectin-3-binding protein OS=Homo sapiens GN=LGALS3BP PE=1 SV=1	195	66202	5.13	√	√	√
DSC1_HUMAN	Desmocollin-1 OS=Homo sapiens GN=DSC1 PE=1 SV=2	353	101406	5.25		√	√
F27E3_HUMAN	Protein FAM27E3 OS=Homo sapiens GN=FAM27E3 PE=1 SV=1	33	13556	11.89		√	√
NCBP1_HUMAN	Nuclear cap-binding protein subunit 1 OS=Homo sapiens GN=NCBP1 PE=1 SV=1	27	92864	5.99	√	√
COASY_HUMAN	Bifunctional coenzyme A synthase OS=Homo sapiens GN=COASY PE=1 SV=4	30	62632	6.51	√	√
MMRN1_HUMAN	Multimerin-1 OS=Homo sapiens GN=MMRN1 PE=1 SV=3	1385	139221	8.15	√	√	√
SNTA1_HUMAN	Alpha-1-syntrophin OS=Homo sapiens GN=SNTA1 PE=1 SV=1	30	54204	6.35	√	√	√
FHL1_HUMAN	Four and a half LIM domains protein 1 OS=Homo sapiens GN=FHL1 PE=1 SV=4	53	38006	9.25	√	√	√
HABP2_HUMAN	Hyaluronan-binding protein 2 OS=Homo sapiens GN=HABP2 PE=1 SV=1	156	64740	6.09	√	√	√
KRT81_HUMAN	Keratin, type II cuticular Hb1 OS=Homo sapiens GN=KRT81 PE=1 SV=3	159	56832	5.4		√	√
DSC3_HUMAN	Desmocollin-3 OS=Homo sapiens GN=DSC3 PE=1 SV=3	218	101218	5.77		√	√
NBR1_HUMAN	Next to BRCA1 gene 1 protein OS=Homo sapiens GN=NBR1 PE=1 SV=3	36	108486	5.03	√	√
ITIH4_HUMAN	Inter-alpha-trypsin inhibitor heavy chain H4 OS=Homo sapiens GN=ITIH4 PE=1 SV=4	1650	103521	6.51	√	√	√
LTBP1_HUMAN	Latent-transforming growth factor beta-binding protein 1 OS=Homo sapiens GN=LTBP1 PE=1 SV=4	381	195112	5.63	√	√	√
PLEC_HUMAN	Plectin OS=Homo sapiens GN=PLEC PE=1 SV=3	175	533462	5.74	√	√	√
PON3_HUMAN	Serum paraoxonase/lactonase 3 OS=Homo sapiens GN=PON3 PE=1 SV=3	70	39810	5.24		√	√
K1H1_HUMAN	Keratin, type I cuticular Ha1 OS=Homo sapiens GN=KRT31 PE=1 SV=3	1418	48633	4.84		√	√
BGH3_HUMAN	Transforming growth factor-beta-induced protein ig-h3 OS=Homo sapiens GN=TGFBI PE=1 SV=1	159	75261	7.62	√	√	√
ADIPO_HUMAN	Adiponectin OS=Homo sapiens GN=ADIPOQ PE=1 SV=1	53	26511	5.42	√	√
HCDH_HUMAN	Hydroxyacyl-coenzyme A dehydrogenase, mitochondrial OS=Homo sapiens GN=HADH PE=1 SV=3	26	34329	8.88	√	√	√
MOONR_HUMAN	Protein moonraker OS=Homo sapiens GN=KIAA0753 PE=1 SV=3	45	110251	7.6	√	√	√
SPKAP_HUMAN	A-kinase anchor protein SPHKAP OS=Homo sapiens GN=SPHKAP PE=1 SV=1	46	189076	5.04	√	√	√
ATG2A_HUMAN	Autophagy-related protein 2 homolog A OS=Homo sapiens GN=ATG2A PE=1 SV=3	29	214893	5.57	√	√	√
AP5B1_HUMAN	AP-5 complex subunit beta-1 OS=Homo sapiens GN=AP5B1 PE=1 SV=4	22	95087	5.61	√	√	√
LONF3_HUMAN	LON peptidase N-terminal domain and RING finger protein 3 OS=Homo sapiens GN=LONRF3 PE=1 SV=1	29	86260	7	√	√	√
SRCRM_HUMAN	Scavenger receptor cysteine-rich domain-containing protein SCART1 OS=Homo sapiens PE=1 SV=2	36	112019	5.76	√	√
PLCH1_HUMAN	1-phosphatidylinositol 4,5-bisphosphate phosphodiesterase eta-1 OS=Homo sapiens GN=PLCH1 PE=1 SV=1	27	191214	7.87		√	√
ACSF4_HUMAN	Acyl-CoA synthetase family member 4 OS=Homo sapiens GN=AASDH PE=1 SV=3	29	124514	6.9	√	√	√
SVEP1_HUMAN	Sushi, von Willebrand factor type A, EGF and pentraxin domain-containing protein 1 OS=Homo sapiens GN=SVEP1 PE=1 SV=3	282	404681	5.32	√	√	√
RHG15_HUMAN	Rho GTPase-activating protein 15 OS=Homo sapiens GN=ARHGAP15 PE=1 SV=2	43	54738	9.42	√	√	√
FBLN7_HUMAN	Fibulin-7 OS=Homo sapiens GN=FBLN7 PE=2 SV=1	31	49055	7.88	√	√	√
ACTBL_HUMAN	Beta-actin-like protein 2 OS=Homo sapiens GN=ACTBL2 PE=1 SV=2	81	42318	5.39	√	√	√
FRPD3_HUMAN	FERM and PDZ domain-containing protein 3 OS=Homo sapiens GN=FRMPD3 PE=2 SV=2	42	200852	8.44	√	√	√
ACL10_HUMAN	Actin-like protein 10 OS=Homo sapiens GN=ACTL10 PE=2 SV=1	20	27247	9.5		√	√
CYTSB_HUMAN	Cytospin-B OS=Homo sapiens GN=SPECC1 PE=1 SV=1	33	119197	6.29	√	√	√
TM201_HUMAN	Transmembrane protein 201 OS=Homo sapiens GN=TMEM201 PE=1 SV=1	33	73444	9.42	√	√	√
KPRP_HUMAN	Keratinocyte proline-rich protein OS=Homo sapiens GN=KPRP PE=1 SV=1	329	67172	8.72	√	√	√
XP32_HUMAN	Skin-specific protein 32 OS=Homo sapiens GN=XP32 PE=1 SV=1	45	28557	8.41	√	√	√
LITD1_HUMAN	LINE-1 type transposase domain-containing protein 1 OS=Homo sapiens GN=L1TD1 PE=1 SV=1	27	99245	4.87	√	√	√
CF163_HUMAN	Uncharacterized protein C6orf163 OS=Homo sapiens GN=C6orf163 PE=4 SV=2	42	38757	6.49	√	√	√
VP13D_HUMAN	Vacuolar protein sorting-associated protein 13D OS=Homo sapiens GN=VPS13D PE=1 SV=2	29	495369	6.15	√	√	√
GARL3_HUMAN	GTPase-activating Rap/Ran-GAP domain-like protein 3 OS=Homo sapiens GN=GARNL3 PE=2 SV=2	21	113808	7.57	√	√	√
SPAT1_HUMAN	Spermatogenesis-associated protein 1 OS=Homo sapiens GN=SPATA1 PE=2 SV=3	30	50504	8.54	√	√	√
DMRTA_HUMAN	Doublesex- and mab-3-related transcription factor A1 OS=Homo sapiens GN=DMRTA1 PE=2 SV=1	23	53890	9.15		√	√
PCX4_HUMAN	Pecanex-like protein 4 OS=Homo sapiens GN=PCNX4 PE=1 SV=4	28	133756	5.88	√	√	√
LAR1B_HUMAN	La-related protein 1B OS=Homo sapiens GN=LARP1B PE=1 SV=2	36	105771	7.33	√	√	√
TM198_HUMAN	Transmembrane protein 198 OS=Homo sapiens GN=TMEM198 PE=1 SV=1	39	40076	9.97	√	√	√
ARID2_HUMAN	AT-rich interactive domain-containing protein 2 OS=Homo sapiens GN=ARID2 PE=1 SV=2	36	198921	7.08	√	√	√
LRC8B_HUMAN	Volume-regulated anion channel subunit LRRC8B OS=Homo sapiens GN=LRRC8B PE=1 SV=2	32	93528	6.4	√	√	√
TTC37_HUMAN	Tetratricopeptide repeat protein 37 OS=Homo sapiens GN=TTC37 PE=1 SV=1	28	177485	7.47		√	√
AP2E_HUMAN	Transcription factor AP-2-epsilon OS=Homo sapiens GN=TFAP2E PE=2 SV=1	17	46696	8.64		√	√
RASF6_HUMAN	Ras association domain-containing protein 6 OS=Homo sapiens GN=RASSF6 PE=1 SV=1	27	43413	8.79	√	√	√
NEK10_HUMAN	Serine/threonine-protein kinase Nek10 OS=Homo sapiens GN=NEK10 PE=2 SV=3	25	134145	6.35	√	√	√
K2C74_HUMAN	Keratin, type II cytoskeletal 74 OS=Homo sapiens GN=KRT74 PE=1 SV=2	154	58229	7.59		√	√
DYM_HUMAN	Dymeclin OS=Homo sapiens GN=DYM PE=1 SV=1	26	76571	5.56		√	√
SETX_HUMAN	Probable helicase senataxin OS=Homo sapiens GN=SETX PE=1 SV=4	29	307022	6.83	√	√	√
NUP54_HUMAN	Nucleoporin p54 OS=Homo sapiens GN=NUP54 PE=1 SV=2	39	55515	6.53	√	√
NPHP3_HUMAN	Nephrocystin-3 OS=Homo sapiens GN=NPHP3 PE=1 SV=1	31	151967	6.31	√		√
PPR42_HUMAN	Protein phosphatase 1 regulatory subunit 42 OS=Homo sapiens GN=PPP1R42 PE=2 SV=2	23	41276	6.81	√	√	√
CF201_HUMAN	Uncharacterized protein C6orf201 OS=Homo sapiens GN=C6orf201 PE=2 SV=3	32	16404	10.39	√	√	√
K2C1B_HUMAN	Keratin, type II cytoskeletal 1b OS=Homo sapiens GN=KRT77 PE=2 SV=3	2088	62149	5.73	√	√	√
TARSH_HUMAN	Target of Nesh-SH3 OS=Homo sapiens GN=ABI3BP PE=1 SV=1	69	119253	9.48		√	√
MTA70_HUMAN	N6-adenosine-methyltransferase 70 kDa subunit OS=Homo sapiens GN=METTL3 PE=1 SV=2	42	65175	5.98	√	√	√
CAPS2_HUMAN	Calcium-dependent secretion activator 2 OS=Homo sapiens GN=CADPS2 PE=1 SV=2	44	148895	5.83	√	√	√
NRAP_HUMAN	Nebulin-related-anchoring protein OS=Homo sapiens GN=NRAP PE=2 SV=2	36	197920	9.24	√	√
ZN410_HUMAN	Zinc finger protein 410 OS=Homo sapiens GN=ZNF410 PE=1 SV=2	38	52765	5.86	√	√	√
ZCH18_HUMAN	Zinc finger CCCH domain-containing protein 18 OS=Homo sapiens GN=ZC3H18 PE=1 SV=2	40	106544	8.39	√	√	√
HORM1_HUMAN	HORMA domain-containing protein 1 OS=Homo sapiens GN=HORMAD1 PE=2 SV=1	30	45685	5.66		√	√
K2C73_HUMAN	Keratin, type II cytoskeletal 73 OS=Homo sapiens GN=KRT73 PE=1 SV=1	174	59457	6.93		√	√
HORN_HUMAN	Hornerin OS=Homo sapiens GN=HRNR PE=1 SV=2	173	283140	10.05		√	√
TEX2_HUMAN	Testis-expressed sequence 2 protein OS=Homo sapiens GN=TEX2 PE=1 SV=2	35	125852	5.71	√	√	√
CC105_HUMAN	Coiled-coil domain-containing protein 105 OS=Homo sapiens GN=CCDC105 PE=2 SV=3	30	57386	9.89	√	√	√
CFA46_HUMAN	Cilia- and flagella-associated protein 46 OS=Homo sapiens GN=CFAP46 PE=2 SV=3	28	306786	7.07	√		√
AGRF4_HUMAN	Adhesion G protein-coupled receptor F4 OS=Homo sapiens GN=ADGRF4 PE=2 SV=3	48	78866	9.23	√	√
SELH_HUMAN	Selenoprotein H OS=Homo sapiens GN=SELH PE=1 SV=2	36	13503	9.76	√	√	√
K2C78_HUMAN	Keratin, type II cytoskeletal 78 OS=Homo sapiens GN=KRT78 PE=2 SV=2	289	57629	5.79		√	√
MINY1_HUMAN	Protein FAM63A OS=Homo sapiens GN=FAM63A PE=1 SV=2	33	52373	4.75			√
IGSF1_HUMAN	Immunoglobulin superfamily member 1 OS=Homo sapiens GN=IGSF1 PE=1 SV=3	37	150778	5.63		√	√
CCD89_HUMAN	Coiled-coil domain-containing protein 89 OS=Homo sapiens GN=CCDC89 PE=2 SV=1	37	44181	5.33		√	√
RGF1A_HUMAN	Ras-GEF domain-containing family member 1A OS=Homo sapiens GN=RASGEF1A PE=2 SV=2	37	55148	7.6		√	√
ARMC2_HUMAN	Armadillo repeat-containing protein 2 OS=Homo sapiens GN=ARMC2 PE=2 SV=4	41	98060	8.53	√	√	√
TTL11_HUMAN	Tubulin polyglutamylase TTLL11 OS=Homo sapiens GN=TTLL11 PE=1 SV=2	18	88526	9.08	√	√	√
ANGL6_HUMAN	Angiopoietin-related protein 6 OS=Homo sapiens GN=ANGPTL6 PE=1 SV=1	316	52061	8.78	√	√	√
TBC16_HUMAN	TBC1 domain family member 16 OS=Homo sapiens GN=TBC1D16 PE=2 SV=1	35	87400	5.54	√	√	√
DEDD2_HUMAN	DNA-binding death effector domain-containing protein 2 OS=Homo sapiens GN=DEDD2 PE=1 SV=1	22	36613	9.23		√	√
SYNE2_HUMAN	Nesprin-2 OS=Homo sapiens GN=SYNE2 PE=1 SV=3	33	801817	5.26		√	√
MUC16_HUMAN	Mucin-16 OS=Homo sapiens GN=MUC16 PE=1 SV=3	35	1520295	5.13	√	√
TITIN_HUMAN	Titin OS=Homo sapiens GN=TTN PE=1 SV=4	20	3842904	6.02	√	√	√
ROBO4_HUMAN	Roundabout homolog 4 OS=Homo sapiens GN=ROBO4 PE=1 SV=1	69	108417	6.18	√	√	√
SL9A6_HUMAN	Sodium/hydrogen exchanger 6 OS=Homo sapiens GN=SLC9A6 PE=1 SV=2	15	74627	6.03		√	√
AKAP1_HUMAN	A-kinase anchor protein 1, mitochondrial OS=Homo sapiens GN=AKAP1 PE=1 SV=1	33	98250	4.84	√	√	√
CASPA_HUMAN	Caspase-10 OS=Homo sapiens GN=CASP10 PE=1 SV=3	34	59597	6.95	√	√	√
ARHG1_HUMAN	Rho guanine nucleotide exchange factor 1 OS=Homo sapiens GN=ARHGEF1 PE=1 SV=2	29	103056	5.47	√	√	√
PRG4_HUMAN	Proteoglycan 4 OS=Homo sapiens GN=PRG4 PE=1 SV=2	897	152238	9.53	√	√	√
H2B1A_HUMAN	Histone H2B type 1-A OS=Homo sapiens GN=HIST1H2BA PE=1 SV=3	29	14159	10.31	√		√
ZN419_HUMAN	Zinc finger protein 419 OS=Homo sapiens GN=ZNF419 PE=1 SV=2	37	60008	9.22		√	√
HES6_HUMAN	Transcription cofactor HES-6 OS=Homo sapiens GN=HES6 PE=2 SV=1	48	24285	5.18	√	√	√
CBPB2_HUMAN	Carboxypeptidase B2 OS=Homo sapiens GN=CPB2 PE=1 SV=2	74	48964	7.61	√	√	√
SPTCS_HUMAN	Spatacsin OS=Homo sapiens GN=SPG11 PE=1 SV=3	33	282681	5.63	√	√	√
LRIQ1_HUMAN	Leucine-rich repeat and IQ domain-containing protein 1 OS=Homo sapiens GN=LRRIQ1 PE=2 SV=3	32	201286	5.85	√	√
RPGR1_HUMAN	X-linked retinitis pigmentosa GTPase regulator-interacting protein 1 OS=Homo sapiens GN=RPGRIP1 PE=1 SV=2	35	147331	5.47		√	√
CU129_HUMAN	Putative uncharacterized protein encoded by LINC00479 OS=Homo sapiens GN=LINC00479 PE=5 SV=2	23	15541	8.28	√	√	√
F227B_HUMAN	Protein FAM227B OS=Homo sapiens GN=FAM227B PE=2 SV=2	37	60317	9		√	√
ZNF48_HUMAN	Zinc finger protein 48 OS=Homo sapiens GN=ZNF48 PE=1 SV=2	37	69203	9.51	√	√	√
CFA54_HUMAN	Cilia- and flagella-associated protein 54 OS=Homo sapiens GN=CFAP54 PE=2 SV=3	35	356021	8.42	√	√	√
BROMI_HUMAN	Protein broad-minded OS=Homo sapiens GN=TBC1D32 PE=2 SV=4	31	146658	6.3	√	√	√
SPB12_HUMAN	Serpin B12 OS=Homo sapiens GN=SERPINB12 PE=1 SV=1	166	46646	5.36		√	√
PGRP2_HUMAN	N-acetylmuramoyl-L-alanine amidase OS=Homo sapiens GN=PGLYRP2 PE=1 SV=1	251	62748	7.25	√	√	√
H2A1A_HUMAN	Histone H2A type 1-A OS=Homo sapiens GN=HIST1H2AA PE=1 SV=3	48	14225	10.86	√		√
SIG11_HUMAN	Sialic acid-binding Ig-like lectin 11 OS=Homo sapiens GN=SIGLEC11 PE=1 SV=2	34	76773	7.28	√	√	√
PEO1_HUMAN	Twinkle protein, mitochondrial OS=Homo sapiens GN=PEO1 PE=1 SV=1	15	77619	9.13	√		√
K1C12_HUMAN	Keratin, type I cytoskeletal 12 OS=Homo sapiens GN=KRT12 PE=1 SV=1	77	53592	4.7	√	√	√
BARD1_HUMAN	BRCA1-associated RING domain protein 1 OS=Homo sapiens GN=BARD1 PE=1 SV=2	28	88075	8.99	√	√
EPAS1_HUMAN	Endothelial PAS domain-containing protein 1 OS=Homo sapiens GN=EPAS1 PE=1 SV=3	26	97652	5.87		√	√
RARR2_HUMAN	Retinoic acid receptor responder protein 2 OS=Homo sapiens GN=RARRES2 PE=1 SV=1	48	18948	9.3	√		√
AKAP9_HUMAN	A-kinase anchor protein 9 OS=Homo sapiens GN=AKAP9 PE=1 SV=3	47	455725	4.95	√	√	√
COL11_HUMAN	Collectin-11 OS=Homo sapiens GN=COLEC11 PE=1 SV=1	502	29046	5.26	√	√	√
STRA6_HUMAN	Stimulated by retinoic acid gene 6 protein homolog OS=Homo sapiens GN=STRA6 PE=1 SV=1	27	74254	9.18		√	√
ASPN_HUMAN	Asporin OS=Homo sapiens GN=ASPN PE=1 SV=2	58	43788	6.61	√	√
KRA33_HUMAN	Keratin-associated protein 3-3 OS=Homo sapiens GN=KRTAP3-3 PE=1 SV=1	93	11441	5.4		√	√
KRA31_HUMAN	Keratin-associated protein 3-1 OS=Homo sapiens GN=KRTAP3-1 PE=1 SV=1	45	11558	5.99		√	√
B2L14_HUMAN	Apoptosis facilitator Bcl-2-like protein 14 OS=Homo sapiens GN=BCL2L14 PE=1 SV=1	49	36918	6.17	√	√	√
CFA74_HUMAN	Cilia- and flagella-associated protein 74 OS=Homo sapiens GN=CFAP74 PE=2 SV=3	42	179846	6.01	√	√	√
UBE2O_HUMAN	(E3-independent) E2 ubiquitin-conjugating enzyme OS=Homo sapiens GN=UBE2O PE=1 SV=3	31	142631	5.01		√	√
NBPF3_HUMAN	Neuroblastoma breakpoint family member 3 OS=Homo sapiens GN=NBPF3 PE=2 SV=1	33	73704	4.4		√	√
KI13A_HUMAN	Kinesin-like protein KIF13A OS=Homo sapiens GN=KIF13A PE=1 SV=2	58	203836	5.43	√	√	√
KCNF1_HUMAN	Potassium voltage-gated channel subfamily F member 1 OS=Homo sapiens GN=KCNF1 PE=1 SV=1	23	56404	5.9	√	√	√
UN45A_HUMAN	Protein unc-45 homolog A OS=Homo sapiens GN=UNC45A PE=1 SV=1	28	104266	5.8		√	√
PCX3_HUMAN	Pecanex-like protein 3 OS=Homo sapiens GN=PCNX3 PE=1 SV=2	38	224293	6.19	√		√
FANCE_HUMAN	Fanconi anemia group E protein OS=Homo sapiens GN=FANCE PE=1 SV=1	30	59415	5.17	√	√	√
AGO4_HUMAN	Protein argonaute-4 OS=Homo sapiens GN=AGO4 PE=1 SV=2	33	98175	9.21	√	√	√
RETN_HUMAN	Resistin OS=Homo sapiens GN=RETN PE=1 SV=1	119	12096	6.51	√	√	√
ABCB9_HUMAN	ATP-binding cassette sub-family B member 9 OS=Homo sapiens GN=ABCB9 PE=1 SV=1	32	84877	8	√	√	√
PLPL8_HUMAN	Calcium-independent phospholipase A2-gamma OS=Homo sapiens GN=PNPLA8 PE=1 SV=1	35	89219	9.31	√	√
IL1AP_HUMAN	Interleukin-1 receptor accessory protein OS=Homo sapiens GN=IL1RAP PE=1 SV=2	30	66118	8.37	√		√
ARHG4_HUMAN	Rho guanine nucleotide exchange factor 4 OS=Homo sapiens GN=ARHGEF4 PE=1 SV=3	37	79986	6.55		√	√
KRT82_HUMAN	Keratin, type II cuticular Hb2 OS=Homo sapiens GN=KRT82 PE=3 SV=3	456	57985	6.4	√	√	√
STAU2_HUMAN	Double-stranded RNA-binding protein Staufen homolog 2 OS=Homo sapiens GN=STAU2 PE=1 SV=1	35	62829	9.62	√	√
BCLF1_HUMAN	Bcl-2-associated transcription factor 1 OS=Homo sapiens GN=BCLAF1 PE=1 SV=2	34	106173	9.99	√	√	√
C1RL_HUMAN	Complement C1r subcomponent-like protein OS=Homo sapiens GN=C1RL PE=1 SV=2	76	54206	6.75	√	√	√
RN181_HUMAN	E3 ubiquitin-protein ligase RNF181 OS=Homo sapiens GN=RNF181 PE=1 SV=1	52	18297	4.93	√	√	√
DAPLE_HUMAN	Protein Daple OS=Homo sapiens GN=CCDC88C PE=1 SV=3	32	229231	5.87	√		√
SYLC_HUMAN	Leucine--tRNA ligase, cytoplasmic OS=Homo sapiens GN=LARS PE=1 SV=2	32	135577	6.95	√	√
FETUB_HUMAN	Fetuin-B OS=Homo sapiens GN=FETUB PE=1 SV=2	111	42883	6.46	√	√	√
SEC63_HUMAN	Translocation protein SEC63 homolog OS=Homo sapiens GN=SEC63 PE=1 SV=2	17	88341	5.21	√		√
AMACR_HUMAN	Alpha-methylacyl-CoA racemase OS=Homo sapiens GN=AMACR PE=1 SV=2	39	42702	6.07	√	√	√
ZPI_HUMAN	Protein Z-dependent protease inhibitor OS=Homo sapiens GN=SERPINA10 PE=1 SV=1	133	50788	8.28		√	√
TNIK_HUMAN	TRAF2 and NCK-interacting protein kinase OS=Homo sapiens GN=TNIK PE=1 SV=1	33	155361	6.7		√	√
MKL2_HUMAN	MKL/myocardin-like protein 2 OS=Homo sapiens GN=MKL2 PE=1 SV=3	26	118282	5.89	√	√	√
KMT2B_HUMAN	Histone-lysine N-methyltransferase 2B OS=Homo sapiens GN=KMT2B PE=1 SV=1	28	297664	8.59		√	√
VPS4A_HUMAN	Vacuolar protein sorting-associated protein 4A OS=Homo sapiens GN=VPS4A PE=1 SV=1	33	49152	7.64	√	√
ABCG2_HUMAN	ATP-binding cassette sub-family G member 2 OS=Homo sapiens GN=ABCG2 PE=1 SV=3	33	72952	8.91	√		√
COR2B_HUMAN	Coronin-2B OS=Homo sapiens GN=CORO2B PE=1 SV=4	28	55488	8.53	√	√	√
SMC3_HUMAN	Structural maintenance of chromosomes protein 3 OS=Homo sapiens GN=SMC3 PE=1 SV=2	33	141853	6.77	√	√	√
COQ6_HUMAN	Ubiquinone biosynthesis monooxygenase COQ6, mitochondrial OS=Homo sapiens GN=COQ6 PE=1 SV=2	29	51123	6.81	√	√	√
CCDC9_HUMAN	Coiled-coil domain-containing protein 9 OS=Homo sapiens GN=CCDC9 PE=1 SV=1	34	59781	5.32	√		√
MTF2_HUMAN	Metal-response element-binding transcription factor 2 OS=Homo sapiens GN=MTF2 PE=1 SV=2	26	68374	8.98	√	√
TLN1_HUMAN	Talin-1 OS=Homo sapiens GN=TLN1 PE=1 SV=3	30	271766	5.77	√	√
PRC2C_HUMAN	Protein PRRC2C OS=Homo sapiens GN=PRRC2C PE=1 SV=4	35	317346	9.17	√	√
EMIL1_HUMAN	EMILIN-1 OS=Homo sapiens GN=EMILIN1 PE=1 SV=2	99	107913	5.07	√	√	√
MD1L1_HUMAN	Mitotic spindle assembly checkpoint protein MAD1 OS=Homo sapiens GN=MAD1L1 PE=1 SV=2	35	83301	5.72	√	√	√
COL10_HUMAN	Collectin-10 OS=Homo sapiens GN=COLEC10 PE=2 SV=2	128	31084	6.96	√	√	√

## Sheet: Formaldehyde-linked sites
Prot_acc	Prot_desc	Pep_seq	Pep_isunique	Pep_exp_mz	Pep_exp_mr	Pep_exp_z	Pep_calc_mr	Pep_delta	Pep_start	Pep_end	Pep_miss	Pep_score	Pep_homol	Pep_ident	Pep_expect	Pep_res_before	Pep_res_after	Pep_var_mod	Pep_var_mod_pos
AKAP9_HUMAN	A-kinase anchor protein 9 OS=Homo sapiens GN=AKAP9 PE=1 SV=3	LEQQLKVVPR	1	701.385	1400.75	2	1400.73	0.0213	2102	2111	1	36.24		31	0.019	K	F	Cys-FA(R) (R); 2 Deamidated (NQ)	0.0077000005.0
ALBU_HUMAN	Serum albumin OS=Homo sapiens GN=ALB PE=1 SV=2	QNCELFEQLGEYK	1	896.875	1791.74	2	1791.73	0.0027	414	426	0	39.97	16	35	0.018	K	F	Cys-FA(C) (C); 2 Deamidated (NQ)	0.7720000000000.0
ALBU_HUMAN	Serum albumin OS=Homo sapiens GN=ALB PE=1 SV=2	QEPERNECFLQHKDDNPNLPR	1	693.56	2770.21	4	2770.21	0.0042	118	138	2	45.96	16	40	0.015	K	L	Cys-FA(C) (C); 2 Deamidated (NQ)	0.700007020000000000000.0
ARHG4_HUMAN	Rho guanine nucleotide exchange factor 4 OS=Homo sapiens GN=ARHGEF4 PE=1 SV=3	SSELIYSGELTR	1	515.59	1543.75	3	1543.72	0.0297	497	508	0	37.28	32	35	0.031	R	V	Cys-FA(Y) (Y)	0.000006000000.0
BROMI_HUMAN	Protein broad-minded OS=Homo sapiens GN=TBC1D32 PE=2 SV=4	QGRKLFPIK	1	638.871	1275.73	2	1275.71	0.0163	444	452	2	31.4		28	0.026	K	L	Cys-FA(R) (R)	0.005000000.0
CO6A2_HUMAN	Collagen alpha-2(VI) chain OS=Homo sapiens GN=COL6A2 PE=1 SV=4	LQAERAR	1	517.273	1032.53	2	1032.51	0.0188	175	181	1	38.94		33	0.013	K	E	Cys-FA(R) (R)	0.0000500.0
COR2B_HUMAN	Coronin-2B OS=Homo sapiens GN=CORO2B PE=1 SV=4	LKEELAQK	1	575.3	1148.58	2	1148.57	0.0102	452	459	1	35.38		33	0.034	R	D	Cys-FA(K) (K); Deamidated (NQ)	0.00000073.0
CYTSB_HUMAN	Cytospin-B OS=Homo sapiens GN=SPECC1 PE=1 SV=1	VTLEGLK	1	475.263	948.511	2	948.495	0.0158	542	548	0	32.81		32	0.048	R	M	Cys-FA(K) (K)	0.0000003.0
DAPLE_HUMAN	Protein Daple OS=Homo sapiens GN=CCDC88C PE=1 SV=3	LNALRR	1	466.766	931.517	2	931.502	0.0149	1374	1379	1	33.97		30	0.022	K	H	Cys-FA(R) (R)	0.000050.0
E2F8_HUMAN	Transcription factor E2F8 OS=Homo sapiens GN=E2F8 PE=1 SV=1	VKVQLAR	1	502.286	1002.56	2	1002.56	-0.0076	459	465	1	31.19		30	0.046	K	S	Cys-FA(R) (R)	0.0000005.0
FRPD3_HUMAN	FERM and PDZ domain-containing protein 3 OS=Homo sapiens GN=FRMPD3 PE=2 SV=2	LELALK	1	438.751	875.487	2	875.479	0.0084	1662	1667	0	32.44		31	0.038	K	F	Cys-FA(K) (K)	0.000003.0
K2C75_HUMAN	Keratin, type II cytoskeletal 75 OS=Homo sapiens GN=KRT75 PE=1 SV=2	QCSSLQTAIADAEQR	1	905.913	1809.81	2	1809.8	0.0125	387	401	0	38.89	20	37	0.035	K	G	Cys-FA(C) (C)	0.020000000000000.0
LRIQ1_HUMAN	Leucine-rich repeat and IQ domain-containing protein 1 OS=Homo sapiens GN=LRRIQ1 PE=2 SV=3	KSLLKSEKEK	1	690.381	1378.75	2	1378.75	-0.0007	1531	1540	3	32.06	26	31	0.04	R	K	Cys-FA(K) (K)	0.0000000003.0
MD1L1_HUMAN	Mitotic spindle assembly checkpoint protein MAD1 OS=Homo sapiens GN=MAD1L1 PE=1 SV=2	RVLLLTKER	1	439.934	1316.78	3	1316.76	0.0213	400	408	2	29.23		25	0.023	K	D	Cys-FA(R) (R)	0.500000000.0
MRP1_HUMAN	Multidrug resistance-associated protein 1 OS=Homo sapiens GN=ABCC1 PE=1 SV=3	IKLMNEILNGIK	1	526.621	1576.84	3	1576.82	0.0217	502	513	1	36.93		32	0.02	R	V	Cys-FA(K) (K); 2 Deamidated (NQ)	0.030070007000.0
RECK_HUMAN	Reversion-inducing cysteine-rich protein with Kazal motifs OS=Homo sapiens GN=RECK PE=1 SV=1	KPITVLEILQK	1	736.915	1471.81	2	1471.83	-0.0173	851	861	0	33.43		30	0.027	K	I	Cys-FA(K) (K); Deamidated (NQ)	0.30000000070.0
RHG15_HUMAN	Rho GTPase-activating protein 15 OS=Homo sapiens GN=ARHGAP15 PE=1 SV=2	VTEPISRHRR	1	815.907	1629.8	2	1629.78	0.0175	52	61	2	35.9		35	0.048	K	N	2 Cys-FA(R) (R)	0.0000000055.0
RN181_HUMAN	E3 ubiquitin-protein ligase RNF181 OS=Homo sapiens GN=RNF181 PE=1 SV=1	TNMLLELAR	1	625.819	1249.62	2	1249.62	0.0068	21	29	0	34.79		34	0.047	R	S	Cys-FA(R) (R)	0.000000005.0
ZN419_HUMAN	Zinc finger protein 419 OS=Homo sapiens GN=ZNF419 PE=1 SV=2	ENSSLVKHQR	1	695.315	1388.62	2	1388.64	-0.0201	466	475	1	34.56		34	0.049	R	V	Cys-FA(K) (K); 2 Deamidated (NQ)	0.0700003070.0
ZNF48_HUMAN	Zinc finger protein 48 OS=Homo sapiens GN=ZNF48 PE=1 SV=2	QSSDLVKHQR	1	695.312	1388.61	2	1388.64	-0.0268	203	212	1	34.62		34	0.047	R	T	Cys-FA(K) (K); 2 Deamidated (NQ)	0.7000003070.0
