# Supplementary material for: Effective lock-in strategy for proteomic analysis of corona complexes bound to amino-free ligands of gold nanoparticles
Source: Royal Society of Chemistry journal article supplement (doi:10.1039/c8nr01077c), 2018-01-01
Supplement: c8nr01077c3.xlsx [file c8nr01077c3.xlsx]

## Sheet: Clusters
Supplementary Table S3. The 36 clusters of the Search Tool for the Retrieval of Interacting Genes/Proteins (STRING) interaction network of the cysteine-binding corona proteins generated using a Molecular Complex Detection (MCODE) analysis.
Clusters	Sub-networks	Rank	MCODE score	Nodes	Edges	Matching proteins (labels)
Cluster 1		1	67.05	40	2682	QSOX1, CLU, CLEC3B, KNG1, SRGN, A2M, SEPP1, ITIH3, APOH, FGB, SERPINF2, FGG, PROS1, ORM1, PF4, LGALS3BP, ITIH4, PLG, SERPING1, THBS1, FGA, AHSG, CFD, PPBP, MMRN1, SERPINA3, SERPINA1, SERPINA4, RARRES2, F5, VWF, ALB, HRG, F2, A1BG, IGF2, ORM2, FN1, TGFB1, APP
Cluster 2		2	12.25	12	147	SERPIND1, APOA2, CRP, TF, GC, CPB2, SERPINC1, APOC3, PROC, CP, TTR, F11
Cluster 3		3	11.6111	18	208	C4BPB, CFI, C1R, HSPG2, C4A, C6, C1QC, C4BPA, C7, APCS, C1QA, C2, C8G, C1S, C1QB, C8B, CFB, C8A
Cluster 4		4	8.875	8	71	KRT17, NID1, KRT16, DSP, KRT6A, KRT14, KRT6B, KRT5
Cluster 5		5	6.75	4	27	HIST1H2BA, HIST1H4H, HIST1H2BB, HIST1H2AA
Cluster 6		6	6.4	5	32	HPX, AMBP, APOB, APOA1, HP
Cluster 7		7	5.833	6	35	RPS3, HBB, RPS15, TOP2B, HBE1, ATP5A1
Cluster 8		8	5.2	5	26	COL6A2, COL6A1, COL18A1, COL6A3, ANG
Cluster 9		9	4	6	24	ITIH2, F13B, C3, AGT, APOE, LPA
Cluster 10		10	3.75	4	15	TFPI, KLKB1, SERPINA5, F12
Cluster 11		11	3.333	3	10	FCN3, MASP2, COLEC11
Cluster 12		12	3.333	6	20	ACTBL2, DSG1, PLEC, ACTL10, DSC1, KRT74
Cluster 13		13	3.25	4	13	TNC, TLN1, CDH1, IQGAP1
Cluster 14		14	3.2	5	16	CETP, PON1, APOA4, APOC1, APOD
Cluster 15		15	3	4	12	ACTB, GSN, EEF1A1, HSP90B1
Cluster 16		16	3	3	9	HBA2, LARS, HBD
Cluster 17		17	2.6	5	13	KRT13, KRT15, KRT1, KRT10, SERPINA10
Cluster 18		18	2.5	2	5	LBP, CD14
Cluster 19		19	2.5	2	5	FANCE, FANCA
Cluster 20		20	2.333	3	7	CFHR1, CFH, C9
Cluster 21		21	2.25	4	9	COX5A, LYZ, C4B, GAPDH
Cluster 22		22	2	2	4	ATP5B, DLD
Cluster 23		23	2	2	4	C5, CPN1
Cluster 24		24	2	2	4	KRT77, KRT2
Cluster 25		25	2	2	4	SYNE2, SMC3
Cluster 26		26	2	2	4	JUP, DSC3
Cluster 27		27	2	3	4	KRT75, CORO2B, KRT6C
Cluster 28		28	2	5	10	TTC37, COMP, FOXM1, DMRTA1, S100A8
Cluster 29		29	1.5	2	3	VTN, ITGA2B
Cluster 30		30	1.5	2	3	FETUB, ITIH1
Cluster 31		31	1.5	2	3	SAA4, APOM
Cluster 32		32	1.5	2	3	CILP, ASPN
Cluster 33		33	1.5	2	3	SPG11, SETX
Cluster 34		34	1	2	2	LTF, KRT18
Cluster 35		35	1	2	2	HADH, LUM
Cluster 36		36	1	2	2	AKAP9, AKAP1
